# Supplementary material for: A reference data set of 5.4 million phased human variants validated by genetic inheritance from sequencing a three-generation 17-member pedigree
Source: HighWire-hosted journal article supplement (doi:10.1101/gr.210500.116), 2016-11-30
Supplement: Supplemental_Table_S12.xlsx [file Supplemental_Table_S12.xlsx]

## Sheet: Sheet
Gene Name	Platinum Bases Gene	Total Bases Gene	% Platinum Gene	Platinum Bases Exons	Total Bases Exons	% Platinum Exons
5S_rRNA	15440	15569	99.1714	15440	15569	99.1714
7SK	35975	36304	99.0938	35975	36304	99.0938
A1BG	15882	16043	98.9964	4013	4027	99.6523
A1BG-AS1	7389	7433	99.408	2789	2793	99.8568
A1CF	86088	86267	99.7925	9552	9567	99.8432
A2M	48083	48255	99.6436	4653	4653	100
A2M-AS1	2864	2879	99.479	2174	2187	99.4056
A2ML1	62783	64448	97.4165	6304	6309	99.9207
A2MP1	5601	5675	98.696	1199	1201	99.8335
A3GALT2	13578	14333	94.7324	1014	1023	99.1202
A4GALT	27853	29160	95.5178	2497	2549	97.96
A4GNT	8629	8670	99.5271	1769	1771	99.8871
AAAS	13996	14173	98.7511	1837	1837	100
AACS	77140	77947	98.9647	4333	4372	99.108
AACSP1	52920	53573	98.7811	2816	2823	99.752
AADAC	14245	14416	98.8138	1605	1606	99.9377
AADACL2	23795	23853	99.7568	1499	1500	99.9333
AADACL3	12548	12609	99.5162	4038	4049	99.7283
AADACL4	22361	22532	99.2411	1574	1575	99.9365
AADAT	29931	30000	99.77	2414	2416	99.9172
AAED1	13996	14067	99.4953	1216	1225	99.2653
AAGAB	54236	54524	99.4718	3391	3406	99.5596
AAK1	184891	185851	99.4835	21515	21636	99.4407
AAMDC	94769	97268	97.4308	1144	1159	98.7058
AAMP	6006	6042	99.4042	1792	1796	99.7773
AANAT	16636	16767	99.2187	2148	2149	99.9535
AAR2	20425	20525	99.5128	2760	2765	99.8192
AARD	5752	5776	99.5845	1775	1786	99.3841
AARS	36684	37116	98.8361	3414	3416	99.9415
AARS2	14557	14601	99.6987	4768	4782	99.7072
AARSD1	13779	13973	98.6116	1595	1595	100
AASDH	45672	49182	92.8632	5897	5900	99.9492
AASDHPPT	21070	21128	99.7255	2859	2868	99.6862
AASS	70557	70747	99.7314	6055	6056	99.9835
AATF	107257	107997	99.3148	2141	2141	100
AATK	47677	48777	97.7448	5296	5358	98.8429
AATK-AS1	17102	17658	96.8513	1786	1803	99.0571
ABAT	107825	109989	98.0325	5928	5930	99.9663
ABCA1	146330	147244	99.3793	11248	11296	99.5751
ABCA10	96309	96809	99.4835	7066	7070	99.9434
ABCA11P	48115	48775	98.6468	2349	2356	99.7029
ABCA12	205816	206886	99.4828	9362	9370	99.9146
ABCA13	472774	476035	99.315	21627	21647	99.9076
ABCA17P	85891	87410	98.2622	5414	5442	99.4855
ABCA2	20304	21689	93.6143	10464	10620	98.5311
ABCA3	63768	64869	98.3027	7170	7189	99.7357
ABCA4	127752	128312	99.5636	8588	8593	99.9418
ABCA5	80767	82748	97.606	9694	9703	99.9072
ABCA6	61999	63169	98.1478	6161	6164	99.9513
ABCA7	23912	25469	93.8867	7166	7202	99.5001
ABCA8	87530	88103	99.3496	6851	6857	99.9125
ABCA9	80902	86364	93.6756	6868	6874	99.9127
ABCB1	207774	209461	99.1946	4714	4716	99.9576
ABCB10	41854	42114	99.3826	3840	3857	99.5592
ABCB11	107270	108385	98.9713	4920	4927	99.8579
ABCB4	73129	73659	99.2805	4524	4536	99.7354
ABCB5	138573	141393	98.0056	8873	8878	99.9437
ABCB6	10661	10687	99.7567	4477	4480	99.933
ABCB7	100066	103169	96.9923	2525	2528	99.8813
ABCB8	19109	19360	98.7035	5391	5393	99.9629
ABCB9	53904	54255	99.3531	6016	6034	99.7017
ABCC1	190939	193497	98.678	6791	6859	99.0086
ABCC10	22736	22872	99.4054	6838	6847	99.8686
ABCC11	79908	80658	99.0701	5030	5038	99.8412
ABCC12	72937	73046	99.8508	6121	6125	99.9347
ABCC13	63719	64218	99.223	5373	5397	99.5553
ABCC2	61543	69200	88.935	5044	5051	99.8614
ABCC3	56363	56846	99.1503	6146	6170	99.611
ABCC4	278677	281605	98.9602	6498	6518	99.6932
ABCC5	96378	98004	98.3409	10560	10564	99.9621
ABCC5-AS1	5035	5082	99.0752	465	469	99.1471
ABCC6	71497	73907	96.7391	5456	5579	97.7953
ABCC6P1	26176	27038	96.8119	2669	2840	93.9789
ABCC6P2	2136	2271	94.0555	652	706	92.3513
ABCC8	83414	84018	99.2811	5109	5144	99.3196
ABCC9	142307	144013	98.8154	10984	11432	96.0812
ABCD1	17165	19894	86.2823	2440	3664	66.5939
ABCD2	68101	68822	98.9524	5337	5341	99.9251
ABCD3	95684	100287	95.4102	5536	5546	99.8197
ABCD4	17665	17788	99.3085	3319	3328	99.7296
ABCE1	31470	31521	99.8382	4395	4404	99.7956
ABCF1	20018	20140	99.3942	3464	3467	99.9135
ABCF2	19292	19395	99.4689	3967	3970	99.9244
ABCF3	7915	7933	99.7731	2578	2579	99.9612
ABCG1	96012	97556	98.4173	4398	4417	99.5698
ABCG2	138928	141059	98.4893	4857	4863	99.8766
ABCG4	13562	13625	99.5376	3907	3943	99.087
ABCG5	26205	26394	99.2839	3713	3718	99.8655
ABCG8	37995	39503	96.1826	2659	2665	99.7749
ABHD1	6908	7024	98.3485	1463	1470	99.5238
ABHD10	14434	14493	99.5929	2793	2806	99.5367
ABHD11	2748	2766	99.3492	1742	1754	99.3158
ABHD12	91494	96240	95.0686	2292	2411	95.0643
ABHD12B	32144	32811	97.9671	1700	1708	99.5316
ABHD13	15819	15841	99.8611	5297	5302	99.9057
ABHD14A	6148	6175	99.5628	1735	1741	99.6554
ABHD14A-ACY1	14115	14177	99.5627	1876	1879	99.8403
ABHD14B	14822	14900	99.4765	2981	2983	99.933
ABHD15	6305	6354	99.2288	3322	3355	99.0164
ABHD16A	26941	27117	99.351	3284	3286	99.9391
ABHD16B	1769	1776	99.6059	1769	1776	99.6059
ABHD17A	7807	8544	91.3741	1716	1798	95.4394
ABHD17B	48581	48781	99.59	3250	3260	99.6933
ABHD17C	60025	60311	99.5258	2337	2360	99.0254
ABHD2	113670	114211	99.5263	9124	9133	99.9015
ABHD3	53507	53909	99.2543	3570	3595	99.3046
ABHD4	14079	14119	99.7167	2927	2928	99.9658
ABHD5	31712	31843	99.5886	5333	5353	99.6264
ABHD6	55166	57203	96.439	2439	2458	99.227
ABHD8	11121	11343	98.0428	2079	2090	99.4737
ABI1	113610	114492	99.2296	3774	3776	99.947
ABI2	102152	103890	98.3271	6877	6915	99.4505
ABI3	12900	12999	99.2384	2105	2109	99.8103
ABI3BP	242950	244156	99.5061	9636	9641	99.9481
ABL1	171505	173795	98.6824	5953	5963	99.8323
ABL2	128741	130358	98.7596	13020	13133	99.1396
ABLIM1	334948	337151	99.3466	9445	9494	99.4839
ABLIM2	188932	193523	97.6277	5752	5776	99.5845
ABLIM3	118578	118948	99.6889	4767	4770	99.9371
ABO	19574	20068	97.5384	1382	1579	87.5237
ABR	170494	183859	92.7308	7425	7553	98.3053
ABRA	10731	10762	99.7119	2753	2754	99.9637
ABRACL	14471	14621	98.9741	845	845	100
ABT1	3103	3107	99.8713	2260	2263	99.8674
ABTB1	7938	7989	99.3616	2252	2257	99.7785
ABTB2	205314	207022	99.175	4868	4903	99.2862
ACAA1	14518	14533	99.8968	1814	1819	99.7251
ACAA2	29974	30378	98.6701	1933	1934	99.9483
ACACA	318589	324976	98.0346	11739	11753	99.8809
ACACB	149314	151631	98.4719	9512	9535	99.7588
ACAD10	69489	71055	97.7961	5360	5371	99.7952
ACAD11	99140	101994	97.2018	3556	3556	100
ACAD8	12292	12313	99.8294	4354	4355	99.977
ACAD9	33423	33625	99.3993	3553	3567	99.6075
ACADL	37392	37500	99.712	2979	2980	99.9664
ACADM	38768	39313	98.6137	3248	3259	99.6625
ACADS	13607	14241	95.5481	2053	2057	99.8055
ACADSB	49132	49378	99.5018	5932	5941	99.8485
ACADVL	7781	8143	95.5545	3235	3245	99.6918
ACAN	70419	71912	97.9239	9434	10633	88.7238
ACAP1	14886	14946	99.5986	2504	2508	99.8405
ACAP2	167143	168353	99.2813	8145	8186	99.4991
ACAP3	16660	17226	96.7143	6817	6852	99.4892
ACAT1	26428	26634	99.2266	4389	4391	99.9545
ACAT2	17019	17099	99.5321	2683	2688	99.814
ACBD3	41578	42044	98.8916	3564	3565	99.9719
ACBD4	11474	11577	99.1103	3085	3094	99.7091
ACBD5	46480	46926	99.0496	4376	4380	99.9087
ACBD6	209899	214671	97.7771	1614	1616	99.8762
ACBD7	72717	73705	98.6595	4151	4189	99.0929
ACCS	18015	18095	99.5579	4318	4319	99.9768
ACCSL	11973	11997	99.7999	1867	1867	100
ACD	3304	3304	100	2912	2912	100
ACE	44200	44782	98.7004	9073	9109	99.6048
ACE2	40497	41037	98.6841	3558	3572	99.6081
ACER1	26596	27131	98.0281	1088	1088	100
ACER2	53569	54694	97.9431	3504	3507	99.9145
ACER3	155334	162934	95.3355	4986	4996	99.7998
ACHE	6754	6925	97.5307	3450	3495	98.7124
ACIN1	36897	37050	99.587	6730	6741	99.8368
ACLY	51001	52094	97.9019	4351	4357	99.8623
ACMSD	62930	63417	99.2321	1357	1357	100
ACN9	64592	65171	99.1116	2054	2057	99.8542
ACO1	66076	66232	99.7645	3946	3946	100
ACO2	59501	59865	99.392	2739	2741	99.927
ACOT1	36775	38435	95.681	2028	2354	86.1512
ACOT11	89615	92488	96.8937	5140	5152	99.7671
ACOT12	63659	64042	99.402	2018	2039	98.9701
ACOT13	37626	38033	98.9299	4392	4393	99.9772
ACOT2	7776	8039	96.7284	2195	2289	95.8934
ACOT4	4021	4061	99.015	1617	1632	99.0809
ACOT6	3043	3045	99.9343	1004	1004	100
ACOT7	127324	129495	98.3235	2351	2462	95.4915
ACOT8	15658	15689	99.8024	3215	3216	99.9689
ACOT9	38335	39631	96.7298	1973	2003	98.5022
ACOX1	37189	37927	98.0542	7881	7919	99.5201
ACOX2	31879	32067	99.4137	2306	2309	99.8701
ACOX3	73520	74444	98.7588	2997	3005	99.7338
ACOXL	383677	385650	99.4884	3286	3321	98.9461
ACP1	13405	13414	99.9329	2548	2550	99.9216
ACP2	9586	9605	99.8022	2799	2799	100
ACP5	4271	4327	98.7058	2138	2139	99.9532
ACP6	23286	23467	99.2287	4111	4116	99.8785
ACPL2	62195	62805	99.0287	3386	3389	99.9115
ACPP	50680	50936	99.4974	3803	3818	99.6071
ACPT	4782	4810	99.4179	1337	1347	99.2576
ACR	6471	7076	91.45	1371	1752	78.2534
ACRBP	9300	9339	99.5824	2061	2063	99.9031
ACRC	34417	35560	96.7857	2963	3178	93.2347
ACRV1	8468	8565	98.8675	1175	1175	100
ACSBG1	60663	63863	94.9893	2979	2980	99.9664
ACSBG2	55835	57462	97.1686	2769	2775	99.7838
ACSF2	48462	48682	99.5481	2376	2418	98.263
ACSF3	60612	61955	97.8323	4192	4213	99.5015
ACSL1	70074	70467	99.4423	4528	4540	99.7357
ACSL3	79076	82388	95.98	4347	4361	99.679
ACSL4	83922	92058	91.1621	5185	5335	97.1884
ACSL5	53341	54223	98.3734	3826	3826	100
ACSL6	201877	205187	98.3868	8956	8980	99.7327
ACSM1	72390	74508	97.1574	2219	2221	99.91
ACSM2A	34230	36133	94.7333	4291	4480	95.7812
ACSM2B	36176	39613	91.3236	2624	2667	98.3877
ACSM3	32675	33168	98.5136	2402	2402	100
ACSM4	23996	24042	99.8087	1743	1743	100
ACSM5	30658	31426	97.5562	2777	2779	99.928
ACSS1	51773	51953	99.6535	5416	5430	99.7422
ACSS2	52320	53004	98.7095	3171	3193	99.311
ACSS3	174213	177774	97.9969	3225	3226	99.969
ACTA1	2800	2851	98.2112	1487	1492	99.6649
ACTA2	55219	56317	98.0503	3023	3034	99.6374
ACTB	3368	3454	97.5101	2233	2253	99.1123
ACTBL2	2794	2794	100	2794	2794	100
ACTC1	7576	7631	99.2793	3690	3693	99.9188
ACTG1	2800	2896	96.6851	2036	2105	96.7221
ACTG1P4	1977	1983	99.6974	1977	1983	99.6974
ACTG2	26254	26688	98.3738	2529	2529	100
ACTL10	2006	2028	98.9152	2006	2028	98.9152
ACTL6A	25382	25486	99.5919	1904	1906	99.8951
ACTL6B	13205	13359	98.8472	1545	1548	99.8062
ACTL7A	1432	1433	99.9302	1432	1433	99.9302
ACTL7B	1402	1407	99.6446	1402	1407	99.6446
ACTL8	71430	71751	99.5526	1861	1861	100
ACTL9	1418	1422	99.7187	1418	1422	99.7187
ACTN1	104595	105244	99.3833	7257	7305	99.3429
ACTN1-AS1	7706	7782	99.0234	597	599	99.6661
ACTN2	74435	77789	95.6883	4705	4725	99.5767
ACTN3	16712	16934	98.689	3324	3330	99.8198
ACTN4	81926	82905	98.8191	4103	4144	99.0106
ACTR10	35217	35521	99.1442	3076	3112	98.8432
ACTR1A	23294	23527	99.0096	2871	2873	99.9304
ACTR1B	8128	8160	99.6078	2248	2258	99.5571
ACTR2	43318	43562	99.4399	4319	4329	99.769
ACTR3	71170	71619	99.3731	5862	5881	99.6769
ACTR3B	91899	95631	96.0975	2201	2217	99.2783
ACTR3BP2	1183	1338	88.4155	1183	1338	88.4155
ACTR3BP5	1253	1645	76.1702	1253	1645	76.1702
ACTR3C	75480	76458	98.7209	1412	1420	99.4366
ACTR5	23887	23993	99.5582	2456	2479	99.0722
ACTR6	41394	41765	99.1117	3519	3536	99.5192
ACTR8	15107	15136	99.8084	3805	3806	99.9737
ACTRT1	1442	1442	100	1442	1442	100
ACTRT2	1420	1422	99.8594	1420	1422	99.8594
ACTRT3	2827	2973	95.0891	1975	2003	98.6021
ACVR1	138218	139417	99.14	3256	3269	99.6023
ACVR1B	45193	45413	99.5156	5495	5559	98.8487
ACVR1C	94455	102121	92.4932	9061	9077	99.8237
ACVR2A	85904	86308	99.5319	5368	5434	98.7854
ACVR2B	38658	38844	99.5212	11324	11455	98.8564
ACVR2B-AS1	3511	3794	92.5409	2505	2517	99.5232
ACVRL1	16396	16454	99.6475	4483	4490	99.8441
ACY1	5898	5919	99.6452	2282	2284	99.9124
ACY3	8084	8105	99.7409	1297	1300	99.7692
ACYP1	10670	10809	98.714	686	686	100
ACYP2	188823	190026	99.3669	1221	1222	99.9182
ADA	32138	32214	99.7641	1529	1532	99.8042
ADAD1	50515	50827	99.3862	2252	2255	99.867
ADAD2	6021	6050	99.5207	2291	2304	99.4358
ADAL	23104	23225	99.479	3957	3967	99.7479
ADAM10	152625	153668	99.3213	5053	5066	99.7434
ADAM11	22430	22647	99.0418	4404	4412	99.8187
ADAM12	369983	374226	98.8662	6972	6987	99.7853
ADAM15	11769	11831	99.476	5077	5115	99.2571
ADAM17	65707	66507	98.7971	4686	4710	99.4904
ADAM18	143778	145497	98.8185	3268	3268	100
ADAM19	177183	180290	98.2767	7035	7100	99.0845
ADAM1A	2840	2840	100	2840	2840	100
ADAM2	94036	94554	99.4522	2670	2671	99.9626
ADAM20	12634	12655	99.8341	2792	2792	100
ADAM20P1	10925	14878	73.4306	3015	3036	99.3083
ADAM21	7727	7749	99.7161	2658	2664	99.7748
ADAM21P1	2017	2049	98.4383	2017	2049	98.4383
ADAM22	260802	268639	97.0827	11134	11143	99.9192
ADAM23	174434	177487	98.2799	6241	6272	99.5057
ADAM28	60913	61147	99.6173	3809	3816	99.8166
ADAM29	59584	59823	99.6005	3431	3440	99.7384
ADAM30	2992	2992	100	2992	2992	100
ADAM32	175543	177387	98.9605	3396	3402	99.8236
ADAM33	14022	14121	99.2989	6029	6071	99.3082
ADAM3A	2604	71945	3.61943	409	3053	13.3967
ADAM5	59739	102716	58.1594	1561	2664	58.5961
ADAM6	535	2540	21.063	393	1842	21.3355
ADAM7	82986	85975	96.5234	4341	4341	100
ADAM8	13952	14488	96.3004	3821	3828	99.8171
ADAM9	106489	108275	98.3505	6069	6073	99.9341
ADAMDEC1	21645	21729	99.6134	2435	2438	99.8769
ADAMTS1	9090	9123	99.6383	4628	4651	99.5055
ADAMTS10	30134	30463	98.92	4469	4482	99.71
ADAMTS12	360005	364838	98.6753	5157	5160	99.9419
ADAMTS13	44115	45050	97.9245	7325	7362	99.4974
ADAMTS14	84144	89637	93.872	6754	6776	99.6753
ADAMTS15	27448	27671	99.1941	5662	5676	99.7533
ADAMTS16	177964	179970	98.8854	5834	5858	99.5903
ADAMTS17	364083	370541	98.2571	6522	6628	98.4007
ADAMTS18	150928	152987	98.6541	5977	6067	98.5166
ADAMTS19	274019	278274	98.4709	5141	5190	99.0559
ADAMTS2	229896	234580	98.0032	7005	7070	99.0806
ADAMTS20	190384	197713	96.2931	6849	6851	99.9708
ADAMTS3	278599	287831	96.7926	6017	6018	99.9834
ADAMTS4	9288	9308	99.7851	4762	4777	99.686
ADAMTS5	49029	49209	99.6342	9606	9663	99.4101
ADAMTS6	321700	333142	96.5654	7816	7819	99.9616
ADAMTS7	50267	52229	96.2435	6035	6307	95.6873
ADAMTS8	23474	23722	98.9546	4047	4176	96.9109
ADAMTS9	170595	172035	99.163	8669	8689	99.7698
ADAMTS9-AS2	320448	326598	98.117	2226	2228	99.9102
ADAMTSL1	421373	436869	96.4529	10910	10929	99.8262
ADAMTSL2	41434	43356	95.5669	5769	5791	99.6201
ADAMTSL3	376509	385756	97.6029	8590	8645	99.3638
ADAMTSL4	11468	11515	99.5918	4578	4584	99.8691
ADAMTSL5	8058	8172	98.605	2983	3008	99.1689
ADAP1	70532	77699	90.7759	2938	2977	98.69
ADAP2	37170	37458	99.2311	2762	2767	99.8193
ADAR	45656	45923	99.4186	7083	7094	99.8449
ADARB1	150159	151986	98.7979	8982	9254	97.0607
ADARB2	526648	556418	94.6497	8726	8835	98.7663
ADARB2-AS1	27227	30355	89.6953	643	644	99.8447
ADAT1	24745	24975	99.0791	3590	3603	99.6392
ADAT2	27710	27873	99.4152	7418	7493	98.9991
ADAT3	7979	8076	98.7989	1608	1626	98.893
ADC	39209	39418	99.4698	6442	6459	99.7368
ADCK1	132660	133872	99.0947	3589	3596	99.8053
ADCK2	22695	22793	99.57	2513	2538	99.015
ADCK3	86826	90658	95.7731	6649	6685	99.4615
ADCK4	25151	25357	99.1876	4571	4576	99.8907
ADCK5	17875	20723	86.2568	1980	2007	98.6547
ADCY1	145983	148976	97.991	12856	12931	99.42
ADCY10	103875	104829	99.0899	5867	5869	99.9659
ADCY10P1	37140	39801	93.3142	7214	7301	98.8084
ADCY2	428903	433852	98.8593	6773	6894	98.2449
ADCY3	98959	100017	98.9422	4462	4465	99.9328
ADCY4	16614	16723	99.3482	4115	4128	99.6851
ADCY5	165127	166250	99.3245	6957	7026	99.0179
ADCY6	22675	22846	99.2515	7686	7729	99.4437
ADCY7	51263	51582	99.3816	6244	6251	99.888
ADCY8	258532	260289	99.325	4088	4101	99.683
ADCY9	151781	153537	98.8563	7597	7727	98.3176
ADCYAP1	7135	7230	98.686	3320	3377	98.3121
ADCYAP1R1	58830	59018	99.6815	6636	6659	99.6546
ADD1	85669	86219	99.3621	10326	10340	99.8646
ADD2	159506	160626	99.3027	6847	6880	99.5203
ADD3	138209	139216	99.2767	5690	5726	99.3713
ADGB	215040	216462	99.3431	7039	7044	99.929
ADH1A	14614	14663	99.6658	1543	1543	100
ADH1B	15016	15046	99.8006	4705	4710	99.8938
ADH1C	15380	16269	94.5356	1470	1470	100
ADH4	20551	20617	99.6799	2125	2127	99.906
ADH5	17673	17802	99.2754	3691	3710	99.4879
ADH6	16562	16609	99.717	2999	3006	99.7671
ADH7	21747	23250	93.5355	2393	2397	99.8331
ADHFE1	36132	36327	99.4632	2243	2244	99.9554
ADI1	21377	21661	98.6889	4586	4616	99.3501
ADIG	7212	7267	99.2432	766	770	99.4805
ADIPOQ	15716	15790	99.5313	4626	4629	99.9352
ADIPOQ-AS1	4233	4237	99.9056	3438	3442	99.8838
ADIPOR1	17596	17741	99.1827	2331	2349	99.2337
ADIPOR2	95357	97599	97.7028	3964	3987	99.4231
ADIRF	2476	2479	99.879	672	672	100
ADK	549863	558119	98.5207	2436	2439	99.877
ADM	2280	2282	99.9124	1449	1449	100
ADM2	4824	4882	98.812	4215	4273	98.6426
ADM5	2304	2306	99.9133	2110	2112	99.9053
ADNP	40317	40645	99.193	4684	4713	99.3847
ADNP2	31026	31314	99.0803	5374	5387	99.7587
ADO	3702	3724	99.4092	3702	3724	99.4092
ADORA1	39509	39698	99.5239	3254	3271	99.4803
ADORA2A	24447	24617	99.3094	3367	3372	99.8517
ADORA2A-AS1	65267	65606	99.4833	3738	3761	99.3885
ADORA2B	30677	30980	99.0219	1861	1885	98.7268
ADORA3	79068	80628	98.0652	3406	3408	99.9413
ADPGK	32839	32960	99.6329	4668	4682	99.701
ADPGK-AS1	15198	15365	98.9131	2722	2730	99.707
ADPRH	10253	10270	99.8345	3507	3508	99.9715
ADPRHL1	29104	31580	92.1596	2173	2173	100
ADPRHL2	5048	5081	99.3505	1685	1691	99.6452
ADPRM	13898	13949	99.6344	1628	1628	100
ADRA1A	116874	117327	99.6139	5508	5518	99.8188
ADRA1B	55704	56278	98.9801	2181	2254	96.7613
ADRA1D	28091	28382	98.9747	2639	2666	98.9872
ADRA2A	3864	3873	99.7676	3864	3873	99.7676
ADRA2B	3259	3266	99.7857	3259	3266	99.7857
ADRA2C	1863	1958	95.1481	1863	1958	95.1481
ADRB1	2738	2862	95.6674	2738	2862	95.6674
ADRB2	2016	2042	98.7267	2016	2042	98.7267
ADRB3	3646	3671	99.319	2629	2646	99.3575
ADRBK1	19879	20125	98.7776	3283	3444	95.3252
ADRBK2	163486	164398	99.4452	9291	9378	99.0723
ADRM1	5778	5892	98.0652	2531	2552	99.1771
ADSL	19943	20072	99.3573	1773	1779	99.6627
ADSS	43449	43643	99.5555	3085	3107	99.2919
ADSSL1	22607	23114	97.8065	2064	2078	99.3263
ADTRP	64962	65393	99.3409	2889	2906	99.415
AEBP1	10047	10205	98.4517	4350	4427	98.2607
AEBP2	81710	82566	98.9633	5671	5807	97.658
AEN	10938	10986	99.5631	3707	3708	99.973
AES	9205	10057	91.5283	3703	3903	94.8757
AFAP1	178657	181214	98.589	7733	7770	99.5238
AFAP1-AS1	24694	24838	99.4202	6786	6794	99.8822
AFAP1L1	69666	69967	99.5698	4531	4564	99.277
AFAP1L2	108622	109933	98.8075	5666	5696	99.4733
AFF1	202764	206053	98.4038	10184	10236	99.492
AFF2	483777	500055	96.7448	13293	14006	94.9093
AFF3	589208	595322	98.973	8919	8967	99.4647
AFF4	87499	88284	99.1108	10325	10340	99.8549
AFG3L1P	27566	28208	97.724	6723	6767	99.3498
AFG3L2	47463	48333	98.2	3200	3209	99.7195
AFM	22190	22257	99.699	1997	1997	100
AFMID	20073	20385	98.4695	3385	3434	98.5731
AFP	24545	24638	99.6225	2326	2326	100
AFTPH	68330	68700	99.4614	4110	4123	99.6847
AGA	11692	11729	99.6845	2101	2102	99.9524
AGAP1	631163	637712	98.973	11159	11367	98.1701
AGAP11	49720	53990	92.0911	5236	5670	92.3457
AGAP2	17690	17869	98.9983	6004	6088	98.6202
AGAP2-AS1	2102	2117	99.2915	1528	1531	99.804
AGAP3	57423	58570	98.0417	7152	7445	96.0645
AGAP4	5007	28276	17.7076	559	2888	19.356
AGAP5	44762	56240	79.591	2380	3948	60.2837
AGAP6	10893	22182	49.1074	1205	2772	43.4704
AGAP7	4950	22177	22.3204	800	2431	32.9083
AGAP8	64852	152379	42.5597	1128	5021	22.4656
AGAP9	33797	103410	32.6825	3202	10914	29.3385
AGBL1	870521	887042	98.1375	4447	4453	99.8653
AGBL1-AS1	19873	20135	98.6988	903	904	99.8894
AGBL2	54963	55786	98.5247	3877	3880	99.9227
AGBL3	147632	149272	98.9013	3533	3533	100
AGBL4	1456449	1491100	97.6761	6275	6282	99.8886
AGBL5	18840	19000	99.1579	3409	3415	99.8243
AGER	3340	3355	99.5529	2444	2453	99.6331
AGFG1	88401	89051	99.2701	8731	8738	99.9199
AGFG2	28696	29010	98.9176	5417	5443	99.5223
AGGF1	32435	34849	93.073	4815	4818	99.9377
AGK	102684	103132	99.5656	3808	3811	99.9213
AGL	72839	73940	98.511	8214	8217	99.9635
AGMAT	13272	13412	98.9562	3106	3154	98.4781
AGMO	351414	361698	97.1567	2474	2475	99.9596
AGO1	54266	54491	99.5871	7679	7698	99.7532
AGO2	101687	104383	97.4172	3429	3500	97.9714
AGO3	124753	125745	99.2111	4497	4515	99.6013
AGO4	49152	49663	98.9711	7019	7060	99.4193
AGPAT1	9898	9906	99.9192	3197	3201	99.875
AGPAT2	14026	14317	97.9675	1526	1548	98.5788
AGPAT3	120817	122360	98.739	7524	7635	98.5462
AGPAT4	142733	144051	99.085	8651	8665	99.8384
AGPAT5	52690	53144	99.1457	5502	5519	99.692
AGPAT6	46439	46814	99.199	6284	6310	99.588
AGPAT9	68988	69961	98.6092	2905	2922	99.4182
AGPS	149753	151094	99.1125	7695	7740	99.4186
AGR2	12443	12475	99.7435	1665	1671	99.6409
AGR3	22202	22584	98.3085	750	750	100
AGRN	33060	35997	91.841	7173	7326	97.9115
AGRP	1243	1243	100	764	764	100
AGT	12045	12065	99.8342	2579	2581	99.9225
AGTPBP1	194334	195491	99.4082	4930	4939	99.8178
AGTR1	45059	45133	99.836	2564	2571	99.7277
AGTR2	4192	4268	98.2193	2892	2899	99.7585
AGTRAP	14631	14687	99.6187	1279	1280	99.9219
AGXT	10206	10375	98.3711	2743	2761	99.3481
AGXT2	46980	50035	93.8943	3395	3395	100
AHCTF1	91182	92325	98.762	8839	8844	99.9435
AHCTF1P1	8797	8836	99.5586	8797	8836	99.5586
AHCY	31331	31538	99.3436	3325	3326	99.9699
AHCYL1	38885	38978	99.7614	4939	4968	99.4163
AHCYL2	204043	205198	99.4371	5735	5778	99.2558
AHDC1	68805	69606	98.8492	6482	6619	97.9302
AHI1	211176	213794	98.7755	6438	6447	99.8604
AHNAK	112274	113319	99.0778	19261	19265	99.9792
AHNAK2	39109	41105	95.1441	16430	18346	89.5563
AHR	47316	47500	99.6126	6200	6247	99.2476
AHRR	125793	134114	93.7956	6791	6875	98.7782
AHSA1	11321	11443	98.9338	1523	1537	99.0891
AHSA2	10079	10134	99.4573	3000	3033	98.912
AHSG	8254	8258	99.9516	1922	1924	99.896
AHSP	920	922	99.7831	504	506	99.6047
AICDA	10575	10681	99.0076	2775	2794	99.32
AIDA	44804	45172	99.1853	4387	4491	97.6843
AIF1	1803	1805	99.8892	1551	1552	99.9356
AIF1L	26511	26677	99.3777	3706	3723	99.5434
AIFM1	35332	36524	96.7364	3246	3253	99.7848
AIFM2	34545	34712	99.5189	4640	4647	99.8494
AIFM3	15987	16232	98.4906	2476	2528	97.943
AIG1	276408	280942	98.3861	4637	4639	99.9569
AIM1	58189	59030	98.5753	8127	8139	99.8526
AIM1L	31924	32272	98.9217	5272	5385	97.9016
AIM2	14340	14373	99.7704	1482	1484	99.8652
AIMP1	33438	33615	99.4734	3252	3260	99.7546
AIMP2	14295	14584	98.0184	1218	1219	99.918
AIP	8026	8075	99.3932	1232	1233	99.9189
AIPL1	11309	11461	98.6738	3797	3813	99.5804
AIRE	11964	12382	96.6241	3077	3129	98.3381
AIRN	4215	4374	96.3649	4215	4374	96.3649
AJAP1	127314	128747	98.887	3203	3317	96.5632
AJUBA	11395	11439	99.6154	4738	4743	99.8946
AK1	11148	11264	98.9702	2242	2266	98.9409
AK2	28778	28972	99.3304	5681	5771	98.4405
AK3	31310	32487	96.377	4529	4621	98.0091
AK4	83771	84597	99.0236	7055	7320	96.3798
AK5	273457	277993	98.3683	5577	5601	99.5715
AK7	96283	97317	98.9375	4315	4328	99.6996
AK8	151559	153234	98.9069	2587	2591	99.8456
AK9	192525	198357	97.0598	8802	8834	99.6378
AKAP1	35868	36158	99.198	4694	4780	98.2008
AKAP10	72626	73405	98.9388	3934	3948	99.6454
AKAP11	51018	51115	99.8102	9876	9920	99.5565
AKAP12	117675	118561	99.2527	8869	8900	99.6517
AKAP13	357733	368743	97.0142	17001	17035	99.8004
AKAP14	23770	24744	96.0637	912	912	100
AKAP17A	10320	10926	94.4536	4063	4079	99.6077
AKAP2	121855	123914	98.3384	7285	7318	99.5491
AKAP3	33341	33538	99.4126	3314	3316	99.9397
AKAP4	9977	10254	97.2986	2990	3005	99.5008
AKAP5	8979	9005	99.7113	6462	6487	99.6146
AKAP6	497503	503790	98.7521	12391	12400	99.9274
AKAP7	144789	147850	97.9297	3453	3461	99.7689
AKAP8	25004	26281	95.141	3948	3957	99.7726
AKAP8L	38661	38975	99.1944	2992	2997	99.8332
AKAP9	168552	169799	99.2656	16242	16254	99.9262
AKIP1	8802	8926	98.6108	2269	2280	99.5175
AKIRIN1	14665	14822	98.9408	2706	2726	99.2663
AKIRIN2	27176	27408	99.1535	1913	1932	99.0166
AKNA	63493	64320	98.7142	8443	8781	96.1508
AKNAD1	146498	147602	99.252	3917	3918	99.9745
AKR1A1	19099	19269	99.1178	1992	2013	98.9568
AKR1B1	16752	16782	99.8212	1398	1398	100
AKR1B10	13765	13823	99.5804	1591	1596	99.6867
AKR1B15	30573	30744	99.4438	3328	3329	99.97
AKR1C1	83519	85363	97.8398	2825	2837	99.577
AKR1C2	29211	30258	96.5398	4026	4155	96.8953
AKR1C3	140774	144425	97.472	2606	2612	99.7703
AKR1C4	21994	22113	99.4619	1191	1192	99.9161
AKR1C6P	43465	44607	97.4399	1437	1437	100
AKR1CL1	27470	30496	90.0774	2102	2127	98.8246
AKR1D1	114636	115981	98.8403	3329	3336	99.7902
AKR1E2	21793	21883	99.5887	2096	2131	98.3576
AKR7A2	9422	9439	99.8199	3025	3038	99.5721
AKR7A2P1	1324	1324	100	1324	1324	100
AKR7A3	6102	6224	98.0398	1175	1241	94.6817
AKR7L	7957	8093	98.3195	2305	2314	99.6111
AKT1	25962	26394	98.3633	4509	4709	95.7528
AKT1S1	9285	9324	99.5817	2994	3010	99.4684
AKT2	54517	55079	98.9796	7046	7141	98.6697
AKT3	349652	355352	98.396	7334	7341	99.9046
AKTIP	11891	11979	99.2654	2459	2518	97.6569
ALAD	14980	15027	99.6872	3535	3536	99.9717
ALAS1	16222	16245	99.8584	2450	2452	99.9184
ALAS2	21801	22010	99.0504	2130	2134	99.8126
ALB	17134	17158	99.8601	2267	2268	99.9559
ALCAM	209317	210201	99.5795	7184	7196	99.8332
ALDH16A1	16464	17833	92.3232	3091	3106	99.5171
ALDH18A1	50569	50882	99.3849	3461	3463	99.9422
ALDH1A1	178769	179781	99.4371	2445	2445	100
ALDH1A2	318997	325841	97.8996	3883	3889	99.8457
ALDH1A3	36051	36822	97.9061	3465	3495	99.1416
ALDH1B1	5985	6002	99.7168	3062	3070	99.7394
ALDH1L1	77405	77626	99.7153	11358	11402	99.6141
ALDH1L1-AS1	4389	4430	99.0745	437	437	100
ALDH1L1-AS2	30064	30104	99.8671	2322	2323	99.957
ALDH1L2	63374	64780	97.8296	8172	8188	99.8046
ALDH2	42902	43099	99.5429	2056	2060	99.8058
ALDH3A1	10348	10449	99.0334	4052	4056	99.9014
ALDH3A2	28343	28845	98.2597	4153	4155	99.9519
ALDH3B1	20624	20696	99.6521	5988	5997	99.8499
ALDH3B2	18453	19053	96.8509	2854	2856	99.93
ALDH4A1	31233	31370	99.5633	3570	3581	99.6928
ALDH5A1	41653	42239	98.6127	5154	5170	99.6905
ALDH6A1	24145	24325	99.26	2343	2343	100
ALDH7A1	52944	53550	98.8683	5239	5295	98.9424
ALDH8A1	32695	32733	99.8839	2599	2599	100
ALDH9A1	35252	36452	96.708	2776	2783	99.7485
ALDOA	17236	17331	99.4518	3465	3469	99.8847
ALDOB	15204	15221	99.8883	2426	2426	100
ALDOC	3818	3819	99.9738	1651	1651	100
ALG1	53079	53678	98.8841	5232	5323	98.2904
ALG10	6003	6021	99.701	3117	3127	99.6802
ALG10B	12879	12972	99.2831	9983	10074	99.0967
ALG11	5322	5327	99.9061	2002	2007	99.7509
ALG12	15029	15253	98.5314	2360	2373	99.4522
ALG13	76871	79530	96.6566	6784	7005	96.8451
ALG14	89427	90229	99.1112	1053	1057	99.6216
ALG1L	7662	7770	98.61	901	921	97.8284
ALG1L2	12562	16560	75.8575	947	991	95.56
ALG1L9P	18161	19497	93.1477	3653	3870	94.3928
ALG2	5531	5540	99.8375	2987	2989	99.9331
ALG3	7169	7197	99.6109	2252	2253	99.9556
ALG5	49355	49597	99.5121	1346	1349	99.7776
ALG6	69808	70973	98.3585	3368	3371	99.911
ALG8	38260	38712	98.8324	1835	1838	99.8368
ALG9	96789	97263	99.5127	7762	7812	99.36
ALK	720588	728838	98.8681	6321	6385	98.9977
ALKBH1	35351	35608	99.2783	2582	2585	99.8839
ALKBH2	5295	5301	99.8868	1197	1197	100
ALKBH3	39026	39469	98.8776	1727	1729	99.8843
ALKBH4	8575	8655	99.0757	2117	2121	99.8114
ALKBH5	26191	26401	99.2046	3379	3433	98.427
ALKBH6	5108	5120	99.7656	1568	1571	99.809
ALKBH7	2565	2818	91.022	1329	1331	99.8497
ALKBH8	62807	63009	99.6794	4067	4067	100
ALLC	43524	44475	97.8617	2540	2540	100
ALMS1	216981	224161	96.7969	13534	13630	99.2957
ALMS1P	40223	40649	98.952	1578	1592	99.1206
ALOX12	14099	14672	96.0946	2604	2616	99.5413
ALOX12B	14898	15068	98.8718	2499	2502	99.8801
ALOX12P2	45837	46774	97.9968	3079	3084	99.8379
ALOX15	10940	11376	96.1674	3018	3026	99.7356
ALOX15B	9994	10094	99.0093	2990	3004	99.534
ALOX5	70853	71944	98.4835	2554	2561	99.7267
ALOX5AP	50576	50951	99.264	1270	1270	100
ALOXE3	22615	23017	98.2535	3635	3636	99.9725
ALPI	3891	3910	99.5141	2623	2632	99.6581
ALPK1	144059	145266	99.1691	8617	8630	99.8494
ALPK2	145255	147708	98.3393	7616	7639	99.6989
ALPK3	56637	56803	99.7078	10968	11005	99.6638
ALPL	68392	69048	99.0499	2696	2746	98.1792
ALPP	4150	4252	97.6011	2838	2867	98.9885
ALPPL2	3483	3873	89.9303	2294	2494	91.9808
ALS2	80439	80910	99.4179	10022	10027	99.9501
ALS2CL	24653	24710	99.7693	5593	5612	99.6614
ALS2CR11	126103	131762	95.7051	7401	7407	99.919
ALS2CR12	67423	68975	97.7499	2192	2192	100
ALX1	21511	21526	99.9303	1293	1293	100
ALX3	10213	10326	98.9057	1432	1478	96.8877
ALX4	49040	49439	99.1929	5450	5466	99.7073
ALYREF	3711	3752	98.9072	1079	1097	98.3592
AMACR	21087	21130	99.7965	3854	3864	99.7412
AMBN	14973	15030	99.6208	1989	2002	99.3506
AMBP	18211	18345	99.2696	2036	2040	99.8039
AMBRA1	194711	197658	98.509	5811	5816	99.914
AMD1	80334	81090	99.0677	3612	3616	99.8894
AMDHD1	22527	25300	89.0395	2125	2136	99.485
AMDHD2	10397	10593	98.1497	2212	2283	96.8901
AMELX	7283	7349	99.1019	823	835	98.5629
AMER1	19942	20628	96.6744	8097	8443	95.9019
AMER2	3537	3634	97.3308	3345	3441	97.2101
AMER3	12502	12631	98.9787	6450	6474	99.6293
AMFR	61806	64087	96.4408	3515	3600	97.6389
AMH	2934	2960	99.1216	1996	2018	98.9098
AMHR2	7663	7680	99.7786	3212	3215	99.9067
AMICA1	31281	31368	99.7226	4155	4159	99.9038
AMIGO1	2874	2891	99.412	2455	2471	99.3525
AMIGO2	4211	4245	99.1991	3922	3956	99.1405
AMIGO3	2967	2972	99.8318	2967	2972	99.8318
AMMECR1	237220	246048	96.4121	5720	5907	96.8343
AMMECR1L	23995	24308	98.7124	4742	4776	99.2881
AMN	8085	8187	98.7541	2325	2346	99.1049
AMN1	57713	58038	99.44	2399	2406	99.7091
AMOT	64900	65939	98.4243	7368	7687	95.8501
AMOTL1	108073	108411	99.6882	8969	8999	99.6666
AMOTL2	19996	20070	99.6313	5612	5628	99.7157
AMPD1	22332	22520	99.1652	2405	2406	99.9584
AMPD2	12411	12552	98.8767	4916	4925	99.8173
AMPD3	56815	57259	99.2246	5675	5710	99.387
AMPH	245469	247871	99.0309	5256	5283	99.4889
AMT	5854	5901	99.2035	2358	2359	99.9576
AMTN	14053	14162	99.2303	995	996	99.8996
AMY1A	21216	27100	78.2878	5313	6069	87.5433
AMY2A	11618	13520	85.932	2290	2562	89.3833
AMY2B	71018	74345	95.5249	6825	6842	99.7515
AMZ1	35573	35907	99.0698	4736	4756	99.5795
AMZ2	9142	9161	99.7926	2955	2968	99.562
AMZ2P1	9019	9036	99.8119	3748	3756	99.787
ANAPC1	120199	133298	90.1731	8362	8901	93.9445
ANAPC10	102692	103967	98.7736	1949	1953	99.7952
ANAPC11	8578	8765	97.8665	1357	1393	97.4156
ANAPC13	8313	8320	99.9159	1840	1842	99.8914
ANAPC15	6379	6399	99.6875	2112	2126	99.3415
ANAPC16	368246	374472	98.3374	4363	4394	99.2945
ANAPC1P1	31898	33218	96.0263	1755	1771	99.0966
ANAPC2	13713	13822	99.2114	3443	3508	98.1471
ANAPC4	41190	41273	99.7989	3969	3983	99.6485
ANAPC5	45676	45965	99.3713	4191	4200	99.7857
ANAPC7	30294	30831	98.2582	3644	3644	100
ANG	9907	10010	98.971	1321	1324	99.7734
ANGEL1	25480	25698	99.1517	4108	4111	99.927
ANGEL2	23493	23645	99.3572	5809	5820	99.811
ANGPT1	245920	248545	98.9439	5143	5147	99.9223
ANGPT2	62305	63610	97.9484	6579	6609	99.5461
ANGPT4	43485	43664	99.5901	1914	1921	99.6356
ANGPTL1	21356	21546	99.1182	3631	3633	99.9449
ANGPTL2	35391	35417	99.9266	3569	3572	99.916
ANGPTL3	8813	8819	99.932	2949	2951	99.9322
ANGPTL4	10186	10247	99.4047	1896	1903	99.6322
ANGPTL5	25721	25849	99.5048	2368	2368	100
ANGPTL6	10221	10413	98.1562	1864	1873	99.5195
ANGPTL7	6681	6693	99.8207	2290	2290	100
ANHX	17195	17525	98.117	1752	1765	99.2635
ANK1	242276	243537	99.4822	9238	9281	99.5367
ANK2	561179	565658	99.2082	15242	15252	99.9344
ANK3	696303	707229	98.4551	19566	19620	99.7248
ANKAR	70827	72158	98.1554	5539	5545	99.8918
ANKDD1A	46130	46941	98.2723	4571	4576	99.8907
ANKDD1B	54583	60371	90.4126	2541	2552	99.569
ANKEF1	21640	21711	99.673	3840	3869	99.2505
ANKFN1	321445	329172	97.6526	2426	2426	100
ANKFY1	98874	100610	98.2745	9154	9180	99.7168
ANKH	164853	166979	98.7268	8186	8207	99.7441
ANKHD1	131695	138043	95.4014	8506	8511	99.9413
ANKHD1-EIF4EBP3	141372	147765	95.6735	8395	8400	99.9405
ANKIB1	154469	155151	99.5604	6072	6081	99.852
ANKK1	12589	12628	99.6912	2539	2543	99.8427
ANKLE1	5886	6001	98.0837	3244	3319	97.7403
ANKLE2	34858	36198	96.2981	4608	4715	97.7306
ANKMY1	76115	81437	93.4649	5555	5569	99.7486
ANKMY2	45726	46042	99.3137	2660	2667	99.7375
ANKRA2	13432	13487	99.5922	2192	2198	99.727
ANKRD1	9042	9176	98.5397	1945	1974	98.5309
ANKRD10	36035	36530	98.6449	3199	3219	99.3787
ANKRD11	215009	222941	96.4421	13286	14090	94.2938
ANKRD12	144888	149233	97.0884	11811	11865	99.5449
ANKRD13A	40119	40245	99.6869	5974	5998	99.5999
ANKRD13B	24701	24979	98.8871	3320	3361	98.7801
ANKRD13C	94818	95733	99.0442	6837	6843	99.9123
ANKRD13D	13039	13194	98.8252	3944	4000	98.6
ANKRD16	27729	28172	98.4275	2612	2638	99.0144
ANKRD17	182771	184001	99.3315	9681	9700	99.8041
ANKRD18A	73904	77125	95.8237	5030	5050	99.604
ANKRD18B	47510	48591	97.7753	3749	3753	99.8934
ANKRD18DP	23050	23139	99.6154	2893	2895	99.9309
ANKRD19P	76815	79083	97.1321	2624	2634	99.6203
ANKRD2	11335	11386	99.5521	1449	1451	99.8622
ANKRD20A11P	31693	36670	86.4276	2364	2900	81.5172
ANKRD20A12P	6877	16185	42.49	619	1744	35.4931
ANKRD20A19P	41749	42032	99.3267	5061	5096	99.3132
ANKRD20A3	10196	130667	7.80304	387	11892	3.25429
ANKRD20A4	7013	43129	16.2605	389	3827	10.1646
ANKRD20A5P	44699	47954	93.2122	6240	6861	90.9488
ANKRD20A8P	85279	96148	88.6956	6426	7990	80.4255
ANKRD20A9P	33339	37567	88.7454	33339	37567	88.7454
ANKRD22	31967	32074	99.6664	3948	3983	99.1213
ANKRD23	6074	6108	99.4434	2574	2582	99.6902
ANKRD24	40758	41461	98.3044	4051	4122	98.2775
ANKRD26	95869	96383	99.4667	6922	6926	99.9422
ANKRD26P1	94766	99761	94.993	6244	6249	99.92
ANKRD26P3	75620	82174	92.0242	3640	3726	97.6919
ANKRD27	77064	78196	98.5524	6487	6509	99.662
ANKRD28	190407	192310	99.0105	9874	9937	99.366
ANKRD29	62126	62872	98.8135	2268	2273	99.78
ANKRD30A	98491	106711	92.297	4522	4671	96.8101
ANKRD30B	95725	104499	91.6037	5438	5766	94.3115
ANKRD30BL	80248	110379	72.7022	1400	2168	64.5756
ANKRD30BP2	54781	80085	68.4036	4914	5628	87.3134
ANKRD30BP3	38287	38648	99.0659	4551	4587	99.2152
ANKRD31	165389	168582	98.106	6016	6036	99.6687
ANKRD32	76813	77183	99.5206	4216	4222	99.8579
ANKRD33	3706	3713	99.8115	3706	3713	99.8115
ANKRD33B	91265	93494	97.6159	9231	9333	98.9071
ANKRD34A	5070	5140	98.6381	3543	3612	98.0897
ANKRD34B	13562	13731	98.7692	3948	3950	99.9494
ANKRD34C	15314	15436	99.2096	5419	5424	99.9078
ANKRD35	19194	19318	99.3581	3359	3363	99.8811
ANKRD36	117719	151025	77.9467	6862	9632	71.2417
ANKRD36B	60231	97299	61.903	3777	6719	56.2137
ANKRD36BP1	1836	1850	99.2432	1836	1850	99.2432
ANKRD36BP2	34249	40691	84.1685	1570	1730	90.7514
ANKRD36C	35846	51492	69.6147	1954	2811	69.5126
ANKRD37	3932	3943	99.721	1566	1569	99.8088
ANKRD39	9968	10033	99.3521	895	898	99.6659
ANKRD40	14510	14720	98.5734	4122	4169	98.8726
ANKRD42	61446	61752	99.5045	5457	5477	99.6348
ANKRD44	340450	343781	99.0311	11272	11326	99.5232
ANKRD45	61036	61527	99.202	3988	4121	96.7726
ANKRD46	49807	50035	99.5443	5362	5372	99.8138
ANKRD49	5590	5592	99.9642	3023	3024	99.9669
ANKRD50	48524	48684	99.6713	8783	8797	99.8409
ANKRD52	20413	20553	99.3188	8695	8718	99.7362
ANKRD53	6997	7055	99.1779	2098	2120	98.9623
ANKRD54	13373	13492	99.118	2087	2099	99.4283
ANKRD55	131539	133680	98.3984	2664	2669	99.8127
ANKRD6	199671	200657	99.5086	6632	6644	99.8194
ANKRD61	5177	5177	100	1423	1423	100
ANKRD62	35149	35901	97.9054	4716	4733	99.6408
ANKRD62P1-PARP4P3	20558	21832	94.1645	1538	1538	100
ANKRD63	1133	1143	99.1251	1133	1143	99.1251
ANKRD65	3003	3025	99.2727	2178	2192	99.3613
ANKRD66	12274	12301	99.7805	1057	1057	100
ANKRD7	17993	18073	99.5574	1357	1357	100
ANKRD9	2751	2931	93.8588	1582	1717	92.1374
ANKS1A	226402	228283	99.176	7191	7207	99.778
ANKS1B	1236227	1249864	98.9089	7606	7752	98.1166
ANKS3	37613	37868	99.3266	5622	5647	99.5573
ANKS4B	18667	18735	99.637	2891	2906	99.4838
ANKS6	64952	65184	99.6441	8116	8141	99.6929
ANKUB1	31529	31721	99.3947	4352	4358	99.8623
ANKZF1	6905	6913	99.8843	4473	4477	99.9107
ANLN	62835	63969	98.2273	4767	4770	99.9371
ANO1	109468	111245	98.4026	5448	5509	98.8927
ANO10	247500	255743	96.7768	2828	2854	99.089
ANO2	377273	383582	98.3552	5080	5092	99.7643
ANO3	465569	474008	98.2197	6191	6199	99.8709
ANO4	409006	411116	99.4868	4692	4695	99.9361
ANO5	89817	90192	99.5842	6641	6661	99.6997
ANO6	219162	224418	97.6579	7310	7314	99.9453
ANO7	35036	36868	95.0309	4407	4448	99.0782
ANO8	11287	11607	97.243	4554	4710	96.6879
ANO9	21691	24082	90.0714	3090	3099	99.7096
ANP32A	42102	42387	99.3276	2450	2466	99.3512
ANP32AP1	738	738	100	738	738	100
ANP32B	31979	32736	97.6876	1550	1616	95.9158
ANP32C	705	705	100	705	705	100
ANP32D	396	396	100	396	396	100
ANP32E	17400	17788	97.8188	3537	3553	99.5497
ANPEP	29708	29947	99.2019	3642	3650	99.7808
ANTXR1	235266	236184	99.6113	7555	7626	99.069
ANTXR2	158546	171707	92.3352	8250	8274	99.7099
ANXA1	18486	18527	99.7787	2764	2773	99.6754
ANXA10	93563	95206	98.2743	1510	1510	100
ANXA11	50235	50554	99.369	4016	4034	99.5538
ANXA13	56326	56614	99.4913	1592	1593	99.9372
ANXA2	47947	50836	94.317	2299	2303	99.8263
ANXA2P1	1343	1343	100	1343	1343	100
ANXA2P2	1307	1310	99.771	1307	1310	99.771
ANXA2P3	1343	1350	99.4815	1343	1350	99.4815
ANXA2R	1264	1266	99.842	1264	1266	99.842
ANXA3	58710	58864	99.7384	1616	1618	99.8764
ANXA4	83807	84470	99.2151	3048	3048	100
ANXA5	28747	28996	99.1413	1627	1634	99.5716
ANXA6	56960	57177	99.6205	3113	3115	99.9358
ANXA7	38157	38653	98.7168	2582	2586	99.8453
ANXA8	170678	186160	91.6835	6904	9257	74.5814
ANXA8L2	17510	23728	73.7947	3186	4401	72.3926
ANXA9	13509	13616	99.2142	1820	1824	99.7807
AOAH	204211	211606	96.5053	2556	2557	99.9609
AOAH-IT1	2285	2287	99.9125	571	573	99.651
AOC2	6084	6116	99.4768	2653	2665	99.5497
AOC3	6932	6947	99.7841	4149	4154	99.8796
AOX1	84964	85487	99.3882	5030	5034	99.9205
AOX2P	98083	98496	99.5807	4612	4616	99.9133
AP1AR	38272	38317	99.8826	3151	3160	99.7152
AP1B1	60561	60904	99.4368	6046	6056	99.8349
AP1B1P1	11366	11493	98.895	814	827	98.4281
AP1G1	79194	80072	98.9035	8060	8075	99.8142
AP1G2	8489	8503	99.8354	4789	4800	99.7708
AP1M1	37110	37492	98.9811	2387	2391	99.8327
AP1M2	14397	14645	98.3066	1753	1757	99.7723
AP1S1	6667	6872	97.0169	1283	1297	98.9206
AP1S2	27930	29209	95.6212	3862	4252	90.8278
AP1S3	81554	82273	99.1261	4026	4077	98.7491
AP2A1	39757	40190	98.9226	5591	5702	98.0533
AP2A2	84231	86437	97.4479	6073	6138	98.941
AP2B1	138464	139155	99.5034	6063	6067	99.9341
AP2M1	9200	9246	99.5025	3155	3160	99.8418
AP2S1	12662	12781	99.0689	889	890	99.8876
AP3B1	287796	292430	98.4153	4043	4049	99.8518
AP3B2	49823	50603	98.4586	4601	4647	99.0101
AP3D1	49225	50570	97.3403	5207	5230	99.5602
AP3M1	30597	30812	99.3022	5670	5673	99.9471
AP3M2	18131	18238	99.4133	3921	3950	99.2658
AP3S1	71942	72160	99.6979	1301	1325	98.1887
AP3S2	59258	63787	92.8998	6040	6053	99.7852
AP4B1	10354	10371	99.8361	4552	4555	99.9341
AP4B1-AS1	44370	44603	99.4776	1728	1734	99.654
AP4E1	94917	97229	97.6221	6869	6870	99.9854
AP4M1	8688	8813	98.5816	2488	2507	99.2421
AP4S1	70453	71345	98.7497	6292	6323	99.5097
AP5B1	6661	6694	99.507	6568	6595	99.5906
AP5M1	21153	21192	99.816	3701	3704	99.919
AP5S1	4761	4784	99.5192	1944	1960	99.1837
AP5Z1	18056	18765	96.2217	6560	6593	99.4995
APAF1	89069	90134	98.8184	7183	7191	99.8887
APBA1	229113	244827	93.5816	6561	6584	99.6507
APBA2	227445	279349	81.4197	5623	5739	97.9787
APBA3	10798	10903	99.037	2607	2615	99.6941
APBB1	24175	24290	99.5266	4821	4826	99.8964
APBB1IP	128219	129467	99.036	3929	3967	99.0421
APBB2	401578	404592	99.2551	9192	9238	99.5021
APBB3	6334	6337	99.9527	3292	3294	99.9393
APC	138233	138735	99.6382	11402	11402	100
APC2	22745	23096	98.4803	12340	12567	98.1937
APCDD1	33655	34074	98.7703	2533	2562	98.8681
APCDD1L	55342	55524	99.6722	3280	3283	99.9086
APCDD1L-AS1	103613	104514	99.1379	4317	4322	99.8843
APCS	1044	1046	99.8088	929	931	99.7852
APEH	9480	9500	99.7895	2757	2773	99.423
APEX1	2638	2642	99.8486	1550	1553	99.8068
APEX2	7490	7551	99.1922	2039	2095	97.327
APH1A	3794	3811	99.5539	2249	2266	99.2498
APH1B	31382	31577	99.3825	4203	4257	98.7315
API5	32462	32576	99.65	4059	4061	99.9508
APIP	40915	41226	99.2456	1462	1470	99.4558
APITD1	12548	12714	98.6944	1242	1243	99.9195
APITD1-CORT	21584	21902	98.5481	2148	2151	99.8605
APLF	155616	163166	95.3728	5111	5128	99.6685
APLN	9269	9698	95.5764	2944	3224	91.3151
APLNR	3866	3876	99.742	3866	3876	99.742
APLP1	11491	11562	99.3859	2628	2640	99.5455
APLP2	72482	74991	96.6543	4051	4078	99.3379
APMAP	29812	29846	99.8861	2243	2245	99.9109
APOA1	1865	1870	99.7326	895	897	99.777
APOA1BP	5033	5044	99.7819	1547	1556	99.4216
APOA2	1317	1336	98.5778	473	473	100
APOA4	2587	2594	99.7301	1455	1460	99.6575
APOA5	3048	3051	99.9017	2447	2450	99.8776
APOB	42567	42645	99.8171	14082	14121	99.7238
APOBEC1	15978	16507	96.7953	890	892	99.7758
APOBEC2	11592	11691	99.1532	1629	1634	99.694
APOBEC3A	5405	5662	95.461	1376	1444	95.2909
APOBEC3B	10081	10381	97.1101	1513	1538	98.3745
APOBEC3C	4500	4561	98.6626	1104	1109	99.5491
APOBEC3D	11815	12139	97.3309	2645	2710	97.6015
APOBEC3F	14807	15303	96.7588	6057	6133	98.7608
APOBEC3G	46299	47076	98.3495	3384	3415	99.0922
APOBEC3H	6545	6844	95.6312	1108	1143	96.9379
APOBEC4	7025	7038	99.8153	2777	2778	99.964
APOBR	4286	4322	99.1671	3756	3792	99.0506
APOC1	4939	5030	98.1909	643	644	99.8447
APOC1P1	4542	4584	99.0838	935	939	99.574
APOC2	1073	1111	96.5797	906	944	95.9746
APOC3	3093	3164	97.756	533	533	100
APOC4-APOC2	7223	7328	98.5671	1826	1829	99.836
APOD	15364	15504	99.097	1770	1816	97.467
APOE	3598	3612	99.6124	1169	1180	99.0678
APOF	2226	2229	99.8654	1687	1689	99.8816
APOH	17074	17410	98.0701	1197	1201	99.6669
APOL1	14384	14461	99.4675	3230	3244	99.5684
APOL2	13660	13746	99.3744	2867	2893	99.1013
APOL3	25746	25855	99.5784	4093	4099	99.8536
APOL4	15532	15704	98.9047	3938	3949	99.7214
APOL5	11529	11611	99.2938	1434	1437	99.7912
APOL6	19142	20033	95.5523	10119	10139	99.8027
APOLD1	64955	65549	99.0938	4807	4825	99.6269
APOM	5785	5801	99.7242	910	910	100
APOO	71075	74593	95.2837	1116	1129	98.8485
APOOL	80331	89426	89.8296	6063	6467	93.7529
APOPT1	27650	27938	98.9691	1231	1235	99.6761
APP	282614	290586	97.2566	4469	4480	99.7545
APPBP2	82707	83061	99.5738	6455	6468	99.799
APPL1	45412	45734	99.2959	6328	6343	99.7635
APPL2	62400	62934	99.1515	3649	3679	99.1846
APRT	2450	2466	99.3512	807	807	100
APTX	28870	29036	99.4283	2570	2573	99.8834
AQP1	71784	72122	99.5313	3778	3786	99.7887
AQP10	4137	4210	98.266	1744	1791	97.3758
AQP11	20647	20966	98.4785	2311	2397	96.4122
AQP12A	5600	6639	84.3501	2941	3267	90.0214
AQP12B	5561	6489	85.6989	3018	3303	91.3715
AQP2	8135	8141	99.9263	4176	4179	99.9282
AQP3	6443	6480	99.429	2925	2950	99.1525
AQP4	13672	13709	99.7301	5217	5217	100
AQP4-AS1	320346	325387	98.4508	4417	4425	99.8192
AQP5	4093	4187	97.755	1736	1825	95.1233
AQP6	9885	9946	99.3867	5112	5129	99.6686
AQP7	16494	17570	93.8759	2173	2343	92.7443
AQP7P1	15141	35226	42.9825	1767	3664	48.226
AQP7P3	11425	34986	32.6559	279	529	52.741
AQP8	11938	11969	99.741	1306	1308	99.8471
AQP9	47633	47716	99.8261	3028	3034	99.8022
AQPEP	64907	65149	99.6285	5172	5197	99.519
AQR	112172	113444	98.8787	5077	5080	99.9409
AR	167741	186588	89.8991	11599	12460	93.0899
ARAF	9985	10822	92.2658	3152	3793	83.1004
ARAP1	107914	108637	99.3345	7059	7084	99.6471
ARAP2	295015	296137	99.6211	9713	9715	99.9794
ARAP3	28495	28833	98.8277	5969	5982	99.7827
ARC	3401	3429	99.1834	2920	2948	99.0502
ARCN1	30490	30646	99.491	4169	4179	99.7607
AREG	135946	179633	75.6799	1262	2476	50.9693
AREL1	51423	51853	99.1707	5531	5538	99.8736
ARF1	16492	16553	99.6315	2194	2198	99.818
ARF3	21118	21261	99.3274	3530	3537	99.8021
ARF4	25962	26126	99.3723	1738	1740	99.8851
ARF5	3313	3354	98.7776	1535	1567	97.9579
ARF6	4000	4037	99.0835	3904	3939	99.1114
ARFGAP1	16874	16978	99.3874	3762	3771	99.7613
ARFGAP2	12759	12828	99.4621	3418	3434	99.5341
ARFGAP3	60260	60877	98.9865	2827	2833	99.7882
ARFGEF1	168413	170166	98.9698	11077	11126	99.5596
ARFGEF2	113416	114956	98.6604	9024	9032	99.9114
ARFIP1	130120	131952	98.6116	3090	3090	100
ARFIP2	6777	6797	99.7058	4440	4460	99.5516
ARFRP1	9321	9371	99.4664	3224	3235	99.66
ARG1	11098	11129	99.7214	1496	1496	100
ARG2	31600	31858	99.1902	1975	1980	99.7475
ARGFX	22236	22692	97.9905	5023	5065	99.1708
ARGFXP2	1204	1204	100	1204	1204	100
ARGLU1	24744	24853	99.5614	4217	4264	98.8977
ARHGAP1	23458	23591	99.4362	5364	5374	99.8139
ARHGAP10	335331	340475	98.4892	4277	4284	99.8366
ARHGAP11A	23703	24524	96.6523	5950	5992	99.2991
ARHGAP11B	60239	61114	98.5682	1875	1876	99.9467
ARHGAP12	121925	123479	98.7415	5307	5326	99.6433
ARHGAP15	629613	639023	98.5274	2077	2081	99.8078
ARHGAP17	95466	95964	99.4811	7816	7845	99.6303
ARHGAP18	280624	284453	98.6539	3774	3776	99.947
ARHGAP19	66669	70501	94.5646	5656	5660	99.9293
ARHGAP19-SLIT1	135243	139632	96.8567	1914	1916	99.8956
ARHGAP20	131798	136154	96.8007	7112	7132	99.7196
ARHGAP21	136112	140060	97.1812	8496	8579	99.0325
ARHGAP22	208725	210243	99.278	4451	4472	99.5304
ARHGAP23	82467	83909	98.2815	5717	5929	96.4244
ARHGAP24	516216	527540	97.8534	6356	6367	99.8272
ARHGAP25	146686	147212	99.6427	4442	4447	99.8876
ARHGAP26	456171	458281	99.5396	9021	9041	99.7788
ARHGAP26-AS1	9281	9306	99.7314	977	977	100
ARHGAP27	35661	36140	98.6746	6370	6447	98.8056
ARHGAP28	125890	127220	98.9546	9272	9284	99.8707
ARHGAP29	124588	125222	99.4937	16883	16970	99.4873
ARHGAP30	22484	23029	97.6334	4958	4961	99.9395
ARHGAP31	124573	125104	99.5756	8072	8079	99.9134
ARHGAP32	221681	227139	97.5971	12533	12554	99.8327
ARHGAP33	13109	13308	98.5047	4547	4647	97.8481
ARHGAP35	85805	86401	99.3102	8873	8888	99.8312
ARHGAP36	30749	31642	97.1778	3091	3149	98.1581
ARHGAP39	151507	156632	96.728	5206	5267	98.8418
ARHGAP4	17963	18885	95.1178	2979	3422	87.0544
ARHGAP40	48300	48719	99.14	2836	2838	99.9295
ARHGAP42	300957	303250	99.2439	5063	5064	99.9803
ARHGAP44	200381	202132	99.1337	4431	4454	99.4836
ARHGAP5	81531	82746	98.5317	9613	9675	99.3592
ARHGAP5-AS1	1280	1281	99.9219	1280	1281	99.9219
ARHGAP6	504999	528159	95.615	5992	6554	91.4251
ARHGAP8	107699	110227	97.7066	3583	3630	98.7052
ARHGAP9	16410	16560	99.0942	3834	3842	99.7918
ARHGDIA	3499	3686	94.9267	2167	2185	99.1762
ARHGDIB	19537	19613	99.6125	1216	1216	100
ARHGDIG	2643	2763	95.6569	1270	1307	97.1691
ARHGEF1	44761	47030	95.1754	5845	6113	95.6159
ARHGEF10	129154	134659	95.9119	9748	9921	98.2562
ARHGEF10L	176291	177544	99.2943	10159	10210	99.5005
ARHGEF11	109648	110531	99.2011	7308	7331	99.6863
ARHGEF12	152342	153028	99.5517	10116	10129	99.8717
ARHGEF15	12242	12279	99.6987	5237	5249	99.7714
ARHGEF16	25645	26531	96.6605	4351	4364	99.7021
ARHGEF17	60661	61097	99.2864	8115	8147	99.6072
ARHGEF18	87545	89652	97.6498	6280	6300	99.6825
ARHGEF19	14291	14506	98.5179	3017	3029	99.6038
ARHGEF2	42738	43235	98.8505	5292	5300	99.8491
ARHGEF25	6940	7066	98.2168	3013	3125	96.416
ARHGEF26	134674	136825	98.4279	5453	5485	99.4166
ARHGEF26-AS1	96253	96810	99.4246	2568	2598	98.8453
ARHGEF28	309900	315836	98.1205	13216	13246	99.7735
ARHGEF3	345125	351891	98.0772	5418	5430	99.779
ARHGEF3-AS1	18100	20813	86.9649	487	487	100
ARHGEF33	55558	56087	99.0568	4287	4304	99.605
ARHGEF34P	29222	35168	83.0926	5151	5755	89.5048
ARHGEF35	7274	9616	75.6448	1786	2474	72.1908
ARHGEF37	52918	53393	99.1104	4860	4865	99.8972
ARHGEF38	127758	128294	99.5822	6083	6091	99.8687
ARHGEF38-IT1	8564	8645	99.063	453	453	100
ARHGEF39	16909	16992	99.5115	6461	6490	99.5532
ARHGEF4	130683	132051	98.964	7448	7464	99.7856
ARHGEF40	19396	19510	99.4157	7075	7093	99.7462
ARHGEF5	22307	25237	88.3901	5445	6018	90.4786
ARHGEF6	113088	115792	97.6648	5626	5707	98.5807
ARHGEF7	187310	190458	98.3471	10567	10641	99.3046
ARHGEF9	145566	150579	96.6709	6374	6454	98.7605
ARID1A	85474	86080	99.296	8803	8996	97.8546
ARID1B	429654	432850	99.2616	13109	13292	98.6232
ARID2	177343	178200	99.5191	11530	11539	99.922
ARID3A	45725	46767	97.7719	2706	2810	96.2989
ARID3B	56569	56925	99.3746	6005	6058	99.1251
ARID3C	6532	6557	99.6187	1231	1239	99.3543
ARID4A	74627	75230	99.1985	6131	6134	99.9511
ARID4B	193811	197035	98.3637	10923	10963	99.6351
ARID5A	15774	15908	99.1577	2971	3031	98.0205
ARID5B	193923	195695	99.0945	8432	8452	99.7634
ARIH1	111469	112230	99.3219	5217	5251	99.3525
ARIH2	65243	66691	97.8288	4999	5005	99.8801
ARIH2OS	1587	1598	99.3116	1587	1598	99.3116
ARL1	14618	14670	99.6455	3209	3210	99.9688
ARL10	7842	8002	98.0005	3363	3383	99.4088
ARL11	5573	5574	99.9821	3759	3760	99.9734
ARL13A	18909	21124	89.5143	1513	1537	98.4385
ARL13B	74835	75540	99.0667	4107	4109	99.9513
ARL14	1281	1288	99.4565	1281	1288	99.4565
ARL14EP	14420	14517	99.3318	1770	1770	100
ARL14EPL	7185	7665	93.7378	642	642	100
ARL15	419476	425790	98.5171	2539	2545	99.7642
ARL16	2707	2731	99.1212	1845	1862	99.087
ARL17A	127839	181396	70.4751	10115	13527	74.7764
ARL2	8017	8073	99.3063	1816	1832	99.1266
ARL2BP	8451	8508	99.33	2125	2125	100
ARL3	40234	40707	98.838	3852	3874	99.4321
ARL4A	4080	4107	99.3426	3403	3428	99.2707
ARL4C	3930	4008	98.0539	3930	4008	98.0539
ARL4D	2143	2152	99.5818	1584	1585	99.9369
ARL5A	39266	39418	99.6144	3590	3621	99.1439
ARL5B	18561	18628	99.6403	3580	3589	99.7492
ARL5C	10038	10172	98.6827	1906	1911	99.7384
ARL6	36223	36359	99.626	1858	1860	99.8925
ARL6IP1	9838	9867	99.7061	2434	2436	99.9179
ARL6IP4	2575	2581	99.7675	1592	1598	99.6245
ARL6IP5	20955	21150	99.078	2126	2128	99.906
ARL6IP6	43109	43361	99.4188	3309	3324	99.5487
ARL8A	11246	11340	99.1711	1770	1795	98.6072
ARL8B	58141	58672	99.095	2980	2985	99.8325
ARL9	18551	18684	99.2882	836	836	100
ARMC1	31183	31762	98.1771	3037	3042	99.8356
ARMC10	24598	24883	98.8546	2432	2634	92.3311
ARMC12	11729	11830	99.1462	1172	1172	100
ARMC2	125032	125734	99.4417	3409	3413	99.8828
ARMC3	108825	109561	99.3282	4866	4869	99.9384
ARMC4	182715	186881	97.7708	4322	4353	99.2878
ARMC5	8859	8895	99.5953	5032	5044	99.7621
ARMC6	25698	25924	99.1282	2741	2746	99.8179
ARMC7	20117	20279	99.2011	2461	2473	99.5148
ARMC8	110424	111114	99.379	7293	7296	99.9589
ARMC9	174243	175313	99.3897	5033	5081	99.0553
ARMCX1	4129	4162	99.2071	2119	2133	99.3436
ARMCX2	4502	4596	97.9547	3167	3240	97.7469
ARMCX3	4655	4712	98.7903	3419	3465	98.6724
ARMCX4	13438	13791	97.4404	8355	8524	98.0174
ARMCX5	4932	4990	98.8377	3042	3048	99.8031
ARMCX6	2854	2884	98.9598	1921	1936	99.2252
ARMS2	2657	2690	98.7732	794	808	98.2673
ARNT	66032	67064	98.4612	4928	4992	98.7179
ARNT2	192906	193586	99.6487	7039	7098	99.1688
ARNTL	108895	109488	99.4584	3381	3387	99.8229
ARNTL2	90796	92960	97.6721	7385	7444	99.2074
ARPC1A	61688	62389	98.8764	2195	2196	99.9545
ARPC1B	19779	20107	98.3687	1504	1531	98.2364
ARPC2	37003	37255	99.3236	2908	2964	98.1107
ARPC3	15294	15453	98.9711	884	884	100
ARPC4	14433	14611	98.7817	2043	2081	98.174
ARPC4-TTLL3	61751	62591	98.658	4656	4678	99.5297
ARPC5	9691	9749	99.4051	2085	2086	99.9521
ARPC5L	13320	13430	99.1809	1905	1922	99.1155
ARPP19	21820	21933	99.4848	5203	5214	99.789
ARPP21	154776	155323	99.6478	6853	6873	99.709
ARR3	13302	13506	98.4896	1417	1433	98.8835
ARRB1	91080	91710	99.3131	7478	7522	99.415
ARRB2	10729	11007	97.4743	2012	2018	99.7027
ARRDC1	10462	10562	99.0532	3372	3425	98.4526
ARRDC2	11819	12968	91.1397	2924	2942	99.3882
ARRDC3	14559	14609	99.6577	4135	4161	99.3752
ARRDC4	54123	54285	99.7016	4099	4113	99.6596
ARRDC5	11827	12431	95.1412	1636	1638	99.8779
ARSA	5381	5420	99.2804	4470	4501	99.3113
ARSB	197458	209321	94.3326	6650	6675	99.6255
ARSD	22994	25406	90.5062	5148	5404	95.2628
ARSE	32143	33614	95.6238	2574	2603	98.8859
ARSF	63956	72496	88.22	2317	2349	98.6377
ARSG	154977	161678	95.8553	3218	3255	98.8633
ARSH	24273	26773	90.6622	1650	1689	97.6909
ARSI	6599	6617	99.728	3152	3167	99.5264
ARSJ	78618	79439	98.9665	4749	4759	99.7899
ARSK	49852	49982	99.7399	4301	4301	100
ART1	17057	19286	88.4424	1456	1464	99.4536
ART3	100946	101623	99.3338	2490	2490	100
ART4	14027	14169	98.9978	1454	1456	99.8626
ART5	3774	3811	99.0291	1673	1691	98.9355
ARTN	3841	3921	97.9597	2204	2262	97.4359
ARV1	21475	21657	99.1596	1552	1579	98.2901
ARVCF	46318	46908	98.7422	4153	4167	99.664
ARX	10960	12253	89.4475	1881	2874	65.4489
AS3MT	31841	32446	98.1354	2491	2511	99.2035
ASAH1	28388	28583	99.3178	2958	2962	99.865
ASAH2	44572	61371	72.6271	2142	2418	88.5856
ASAH2B	12061	14882	81.0442	600	726	82.6446
ASAP1	388351	391556	99.1815	6335	6355	99.6853
ASAP2	196789	198919	98.9292	5602	5717	97.9885
ASAP3	55432	56002	98.9822	4255	4331	98.2452
ASB1	25132	25266	99.4696	6786	6833	99.3122
ASB10	12093	12135	99.6539	2310	2315	99.784
ASB11	32630	33916	96.2083	2744	3096	88.6305
ASB12	6428	6440	99.8137	1296	1303	99.4628
ASB13	27056	27739	97.5378	2775	2812	98.6842
ASB14	24198	24332	99.4493	3207	3207	100
ASB15	35767	36012	99.3197	3117	3121	99.8718
ASB16	8297	8378	99.0332	2127	2139	99.439
ASB16-AS1	9068	10744	84.4006	2244	2258	99.38
ASB17	13231	13559	97.5809	1107	1107	100
ASB18	68816	69474	99.0529	1587	1614	98.3271
ASB2	42415	42578	99.6172	4591	4627	99.222
ASB3	188551	190054	99.2092	2959	3031	97.6245
ASB4	54077	54331	99.5325	4322	4322	100
ASB5	53440	55548	96.2051	3244	3244	100
ASB6	7537	7566	99.6167	5405	5426	99.613
ASB7	49005	49150	99.705	5128	5130	99.961
ASB8	9690	9806	98.8171	2592	2613	99.1963
ASB9	25013	26481	94.4564	1939	2058	94.2177
ASB9P1	1621	1625	99.7538	1621	1625	99.7538
ASCC1	119692	121103	98.8349	3564	3567	99.9159
ASCC2	49231	49697	99.0623	3002	3009	99.7674
ASCC3	367785	372617	98.7032	10953	10967	99.8723
ASCL1	2839	2843	99.8593	2480	2484	99.839
ASCL2	2363	2455	96.2525	1828	1849	98.8643
ASCL3	5425	5462	99.3226	648	650	99.6923
ASCL4	2229	2260	98.6283	2229	2260	98.6283
ASCL5	1406	1420	99.0141	1406	1420	99.0141
ASF1A	15023	15095	99.523	2505	2508	99.8804
ASF1B	16890	17120	98.6565	1726	1731	99.7111
ASGR1	6048	6133	98.6141	1624	1630	99.6319
ASGR2	13348	13652	97.7732	1635	1652	98.9709
ASH1L	225669	227534	99.1803	11756	11805	99.5849
ASH1L-AS1	1846	1964	93.9919	1846	1964	93.9919
ASH2L	34295	34588	99.1529	3301	3301	100
ASIC1	25832	25986	99.4074	4738	4754	99.6634
ASIC2	1131505	1143720	98.932	4177	4271	97.7991
ASIC3	4433	4465	99.2833	2305	2314	99.6111
ASIC4	24349	24603	98.9676	5207	5224	99.6746
ASIC5	36302	36545	99.3351	1691	1692	99.9409
ASIP	8927	8978	99.4319	581	584	99.4863
ASL	17409	17554	99.174	3179	3221	98.6961
ASMT	40819	47698	85.578	1485	1490	99.6644
ASMTL	45795	50624	90.461	2237	2278	98.2002
ASMTL-AS1	12143	14891	81.5459	2879	3017	95.4259
ASNA1	10669	10832	98.4952	1278	1280	99.8438
ASNS	19923	20426	97.5375	2523	2526	99.8812
ASNSD1	9287	9433	98.4522	2468	2471	99.8786
ASPA	25216	25297	99.6798	1483	1483	100
ASPDH	3071	3091	99.353	1256	1257	99.9204
ASPG	26500	27024	98.061	2696	2721	99.0812
ASPH	213271	214085	99.6198	12002	12033	99.7424
ASPHD1	18675	18807	99.2981	1628	1629	99.9386
ASPHD2	15373	15699	97.9234	3275	3313	98.853
ASPM	62392	62568	99.7187	11008	11026	99.8367
ASPN	26300	26356	99.7875	2513	2524	99.5642
ASPRV1	2172	2174	99.908	2172	2174	99.908
ASPSCR1	39494	39857	99.0892	2331	2354	99.0229
ASRGL1	54960	56114	97.9435	3852	3870	99.5349
ASS1	56219	56568	99.383	2253	2290	98.3843
ASTE1	12893	12926	99.7447	2796	2797	99.9642
ASTL	14558	14587	99.8012	1293	1296	99.7685
ASTN1	305661	307584	99.3748	9100	9108	99.9122
ASTN2	973319	989814	98.3335	7979	8076	98.7989
ASUN	33061	33143	99.7526	2974	2976	99.9328
ASXL1	79742	80976	98.4761	7450	7522	99.0428
ASXL2	137947	139060	99.1996	7219	7235	99.7789
ASXL3	168353	168859	99.7003	7669	7724	99.2879
ASZ1	64033	64302	99.5817	1862	1865	99.8391
ATAD1	64692	65043	99.4604	3391	3391	100
ATAD2	95738	96500	99.2104	6462	6469	99.8918
ATAD2B	174297	178403	97.6985	9041	9054	99.8564
ATAD3A	21797	22545	96.6822	2673	2807	95.2262
ATAD3B	36884	37526	98.2892	3878	4009	96.7324
ATAD3C	20046	20470	97.9287	3724	3859	96.5017
ATAD5	62254	63273	98.3895	6296	6307	99.8256
ATAT1	19799	19986	99.0643	3405	3436	99.0978
ATCAY	46377	47463	97.7119	5161	5171	99.8066
ATE1	184249	185593	99.2758	2685	2694	99.6659
ATF1	56499	57155	98.8522	2576	2657	96.9514
ATF2	95251	95957	99.2643	4851	4852	99.9794
ATF3	55185	55444	99.5329	3354	3356	99.9404
ATF4	2120	2123	99.8587	2120	2123	99.8587
ATF5	5084	5235	97.1156	2238	2375	94.2316
ATF6	196601	197827	99.3803	10147	10189	99.5878
ATF6B	30221	30445	99.2642	3782	3800	99.5263
ATF7	117482	118560	99.0908	7347	7351	99.9456
ATF7IP	132149	133087	99.2952	6363	6379	99.7492
ATF7IP2	95284	97584	97.6431	3699	3708	99.7573
ATG10	277027	283373	97.7605	3815	3871	98.5533
ATG12	13562	13655	99.3189	4544	4562	99.6054
ATG13	58314	58743	99.2697	6053	6074	99.6543
ATG14	45180	45468	99.3666	5045	5053	99.8417
ATG16L1	43935	44104	99.6168	3403	3405	99.9413
ATG16L2	29132	29267	99.5387	6124	6173	99.2062
ATG2A	22600	22719	99.4762	6544	6552	99.8779
ATG2B	81599	82084	99.4091	11090	11099	99.9189
ATG3	28814	29129	98.9186	2990	2997	99.7664
ATG4A	61014	63003	96.843	2605	2616	99.5795
ATG4B	35902	36245	99.0537	3845	3861	99.5856
ATG4C	80619	81165	99.3273	2723	2724	99.9633
ATG4D	9370	9502	98.6108	2044	2062	99.1271
ATG5	140670	141344	99.5231	3382	3385	99.9114
ATG7	278998	285130	97.8494	5031	5051	99.604
ATG9A	11472	11515	99.6266	5019	5028	99.821
ATG9B	12233	12290	99.5362	4975	4987	99.7594
ATHL1	6393	6551	97.5882	3629	3635	99.8349
ATIC	37647	37818	99.5478	2415	2420	99.7934
ATL1	99530	99985	99.5449	2939	2940	99.966
ATL2	81070	82404	98.3811	3777	3796	99.4995
ATL3	42669	43008	99.2118	2586	2600	99.4615
ATM	137467	146268	93.983	15915	15943	99.8244
ATMIN	11400	11494	99.1822	5907	5991	98.5979
ATN1	19636	20190	97.2561	6661	6750	98.6815
ATOH1	1065	1065	100	1065	1065	100
ATOH7	1513	1519	99.605	1513	1519	99.605
ATOH8	37421	37598	99.5292	8417	8459	99.5035
ATOX1	15692	15828	99.1408	487	489	99.591
ATP10A	184468	186458	98.9327	5847	5865	99.6931
ATP10B	276573	289093	95.6692	9589	9593	99.9583
ATP10D	107372	108094	99.3321	7247	7252	99.9311
ATP11A	189229	196840	96.1334	9194	9239	99.5129
ATP11B	127137	128131	99.2242	8264	8344	99.0412
ATP11C	104036	105943	98.2	6216	6275	99.0598
ATP12A	30895	31375	98.4701	3722	3734	99.6786
ATP13A1	18405	18494	99.5188	5719	5730	99.808
ATP13A2	25754	25971	99.1645	4783	4798	99.6874
ATP13A3	65116	65566	99.3137	9167	9183	99.8258
ATP13A4	151871	152831	99.3719	5295	5297	99.9622
ATP13A5	103170	103684	99.5043	3655	3657	99.9453
ATP1A1	32212	32393	99.4412	5863	5912	99.1712
ATP1A1OS	25723	25758	99.8641	2634	2635	99.962
ATP1A2	27668	27855	99.3287	5965	5972	99.8828
ATP1A3	27285	27695	98.5196	4007	4054	98.8407
ATP1A4	35188	35416	99.3562	5526	5550	99.5676
ATP1B1	25813	26014	99.2273	2183	2200	99.2273
ATP1B2	6736	6836	98.5372	3255	3332	97.6891
ATP1B3	49499	49913	99.1706	1960	1965	99.7455
ATP1B4	20424	21165	96.4989	4700	4773	98.4706
ATP2A1	25733	26022	98.8894	3687	3695	99.7835
ATP2A2	69320	69866	99.2185	8826	8878	99.4143
ATP2A3	40104	40596	98.7881	4860	4885	99.4882
ATP2B1	67743	68019	99.5942	6928	6933	99.9279
ATP2B2	380616	384010	99.1162	9781	9842	99.3802
ATP2B3	45336	46808	96.8552	6575	6762	97.2345
ATP2B4	116434	117295	99.266	9129	9149	99.7814
ATP2C1	161209	166187	97.0046	7297	7314	99.7676
ATP2C2	92718	95661	96.9235	5268	5283	99.7161
ATP4A	13425	13466	99.6955	3665	3668	99.9182
ATP4B	9312	9392	99.1482	1928	1932	99.793
ATP5A1	19783	20090	98.4719	2874	2912	98.6951
ATP5B	7848	7894	99.4173	1843	1843	100
ATP5C1	19582	19670	99.5526	1615	1615	100
ATP5D	3047	3076	99.0572	995	996	99.8996
ATP5E	3685	3690	99.8645	436	439	99.3166
ATP5EP2	363	368	98.6413	363	368	98.6413
ATP5F1	13020	13064	99.6632	2206	2211	99.7739
ATP5G1	3081	3085	99.8703	644	646	99.6904
ATP5G2	11448	11569	98.9541	1402	1404	99.8575
ATP5G3	5503	5505	99.9637	3480	3482	99.9426
ATP5H	8039	8120	99.0025	622	622	100
ATP5I	1760	1903	92.4855	680	680	100
ATP5J	11062	11175	98.9888	1290	1296	99.537
ATP5J2	8004	8041	99.5399	511	511	100
ATP5J2-PTCD1	48368	49463	97.7862	5527	5538	99.8014
ATP5L	8432	8459	99.6808	1390	1391	99.9281
ATP5L2	778	799	97.3717	778	799	97.3717
ATP5O	12326	12402	99.3872	1395	1395	100
ATP5S	22992	23230	98.9755	2552	2570	99.2996
ATP5SL	8530	8621	98.9444	2580	2633	97.9871
ATP6AP1	7685	7885	97.4635	4593	4776	96.1683
ATP6AP1L	38695	38867	99.5575	2027	2028	99.9507
ATP6AP2	25103	25673	97.7798	2099	2119	99.0562
ATP6V0A1	63328	63736	99.3599	5414	5421	99.8709
ATP6V0A2	49065	49437	99.2475	6736	6772	99.4684
ATP6V0A4	89692	91903	97.5942	3356	3357	99.9702
ATP6V0B	3358	3371	99.6144	2466	2478	99.5157
ATP6V0C	6308	6498	97.076	1141	1231	92.6889
ATP6V0CP3	594	619	95.9612	594	619	95.9612
ATP6V0D1	43007	43173	99.6155	2006	2009	99.8507
ATP6V0D2	54716	55316	98.9153	2368	2370	99.9156
ATP6V0E1	50632	51138	99.0105	882	882	100
ATP6V0E2	7635	7731	98.7582	2940	2959	99.3579
ATP6V0E2-AS1	6132	6169	99.4002	3052	3069	99.4461
ATP6V1A	64581	65040	99.2943	4627	4645	99.6125
ATP6V1B1	29300	29564	99.107	3928	3946	99.5438
ATP6V1B2	24422	24504	99.6654	3041	3044	99.9014
ATP6V1C1	51762	52038	99.4696	5699	5704	99.9123
ATP6V1C2	62852	63462	99.0388	3210	3240	99.0741
ATP6V1D	21929	22140	99.047	1804	1806	99.8893
ATP6V1E1	35944	36686	97.9774	1404	1405	99.9288
ATP6V1E2	8014	8111	98.8041	1979	1979	100
ATP6V1F	3032	3047	99.5077	815	817	99.7552
ATP6V1G1	11058	11159	99.0949	1606	1611	99.6896
ATP6V1G2	2396	2398	99.9166	1602	1603	99.9376
ATP6V1G2-DDX39B	16560	16630	99.5791	2301	2305	99.8265
ATP6V1G3	17636	17724	99.5035	678	678	100
ATP6V1H	124646	127769	97.5557	2683	2686	99.8883
ATP7A	134493	139699	96.2734	13585	13780	98.5849
ATP7B	78512	78825	99.6029	8262	8279	99.7947
ATP8A1	247457	248731	99.4878	8333	8342	99.8921
ATP8A2	641071	649212	98.746	5792	5835	99.2631
ATP8B1	149051	156669	95.1375	5930	5937	99.8821
ATP8B2	25527	25745	99.1532	6518	6580	99.0578
ATP8B3	28622	30202	94.7686	6800	6924	98.2091
ATP8B4	258055	260985	98.8773	8782	8788	99.9317
ATP8B5P	76024	76275	99.6709	6013	6015	99.9667
ATP9A	169153	171595	98.5769	7566	7601	99.5395
ATP9B	294886	308886	95.4676	9499	10319	92.0535
ATPAF1	34805	35689	97.523	4739	4782	99.1008
ATPAF2	23835	24108	98.8676	3636	3639	99.9176
ATPIF1	2010	2015	99.7519	1920	1925	99.7403
ATR	128477	129592	99.1396	11763	11776	99.8896
ATRAID	5144	5148	99.9223	1396	1398	99.8569
ATRIP	20818	20931	99.4601	5101	5116	99.7068
ATRN	173588	180105	96.3816	8674	8731	99.3472
ATRNL1	832953	855373	97.3789	9070	9104	99.6265
ATRX	264429	281364	93.9811	11165	11307	98.7441
ATXN1	459113	462379	99.2937	12470	12522	99.5847
ATXN10	172901	173510	99.649	3312	3337	99.2508
ATXN1L	11309	11343	99.7003	7879	7886	99.9112
ATXN2	142024	147463	96.3116	9099	9279	98.0601
ATXN2L	13982	14190	98.5342	4287	4433	96.7065
ATXN3	47394	48070	98.5937	7157	7285	98.243
ATXN3L	1747	1751	99.7716	1747	1751	99.7716
ATXN7	138293	138904	99.5601	8172	8254	99.0065
ATXN7L1	269316	271811	99.0821	7971	8005	99.5753
ATXN7L2	8787	8860	99.1761	3180	3211	99.0346
ATXN7L3	6326	6357	99.5123	3631	3632	99.9725
ATXN7L3B	3674	3682	99.7827	3674	3682	99.7827
ATXN8OS	32406	32541	99.5851	1439	1472	97.7582
AUH	143273	148110	96.7342	1999	2003	99.8003
AUNIP	25177	25352	99.3097	2054	2061	99.6604
AUP1	3200	3200	100	2404	2404	100
AURKA	22827	22907	99.6508	2544	2547	99.8822
AURKAIP1	1704	1709	99.7074	1219	1223	99.6729
AURKAPS1	1536	1537	99.9349	1536	1537	99.9349
AURKB	5776	5896	97.9647	1356	1356	100
AURKC	4507	4540	99.2731	1290	1301	99.1545
AUTS2	1179896	1193981	98.8203	6544	6693	97.7738
AVEN	170419	172876	98.5788	1499	1531	97.9099
AVIL	18653	18693	99.786	3560	3561	99.9719
AVL9	521514	543861	95.891	3030	3050	99.3443
AVP	2014	2169	92.8538	593	619	95.7997
AVPI1	9637	9835	97.9868	1392	1392	100
AVPR1A	9996	10052	99.4429	7818	7831	99.834
AVPR1B	7195	7200	99.9306	1769	1773	99.7744
AVPR2	4538	4636	97.8861	2144	2194	97.7211
AWAT1	5935	6007	98.8014	1399	1399	100
AWAT2	9237	9397	98.2973	2104	2124	99.0584
AXDND1	185415	189016	98.0949	5833	5851	99.6924
AXIN1	64145	65237	98.3261	3429	3660	93.6885
AXIN2	111189	112501	98.8338	4908	4937	99.4126
AXL	42239	42564	99.2364	4869	4894	99.4892
AZGP1	9334	9386	99.446	1265	1265	100
AZGP1P1	13127	13204	99.4168	2725	2751	99.0549
AZI1	32181	33359	96.4687	3687	3714	99.273
AZI2	26718	26775	99.7871	4068	4079	99.7303
AZIN1	37552	37862	99.1812	4329	4348	99.563
AZU1	3775	4187	90.16	904	912	99.1228
B2M	6662	6673	99.8352	1614	1614	100
B3GALNT1	21458	21490	99.8511	3641	3641	100
B3GALNT2	56839	57277	99.2353	5575	5611	99.3584
B3GALT1	47882	52185	91.7543	2161	2168	99.6771
B3GALT2	7879	7884	99.9366	3547	3548	99.9718
B3GALT4	1675	1686	99.3476	1675	1686	99.3476
B3GALT5	105221	106447	98.8483	3709	3726	99.5437
B3GALT6	2727	2792	97.6719	2727	2792	97.6719
B3GALTL	125992	132300	95.232	4546	4601	98.8046
B3GAT1	32749	33415	98.0069	3826	3829	99.9217
B3GAT2	88176	95720	92.1187	1991	2005	99.3017
B3GAT3	6802	6880	98.8663	2049	2054	99.7566
B3GNT1	2290	2319	98.7495	2041	2070	98.599
B3GNT2	28555	28605	99.8252	2739	2749	99.6362
B3GNT3	18192	18467	98.5109	2729	2739	99.6349
B3GNT4	3802	3857	98.574	1494	1504	99.3351
B3GNT5	20046	20148	99.4937	4748	4761	99.7269
B3GNT6	7245	7571	95.6941	2461	2498	98.5188
B3GNT7	5392	5541	97.311	3525	3625	97.2414
B3GNT8	3294	3372	97.6868	1812	1874	96.6916
B3GNT9	2888	2898	99.6549	2695	2705	99.6303
B3GNTL1	98897	109656	90.1884	5750	5762	99.7917
B4GALNT1	7321	7345	99.6732	4447	4465	99.5969
B4GALNT2	36468	37530	97.1703	2102	2110	99.6209
B4GALNT3	99077	101516	97.5974	4305	4313	99.8145
B4GALNT4	11199	12323	90.8788	3428	3454	99.2472
B4GALT1	56382	56718	99.4076	4152	4199	98.8807
B4GALT2	11741	11970	98.0869	2343	2425	96.6186
B4GALT3	6632	6659	99.5945	2543	2546	99.8822
B4GALT4	28829	29166	98.8445	6173	6182	99.8544
B4GALT5	80180	80939	99.0623	4653	4727	98.4345
B4GALT6	62165	62478	99.499	4779	4828	98.9851
B4GALT7	10172	10228	99.4525	2026	2046	99.0225
B9D1	40378	40629	99.3822	2025	2026	99.9506
B9D2	9545	9757	97.8272	1031	1031	100
BAALC	89299	89613	99.6496	3093	3113	99.3575
BAAT	24501	24589	99.6421	3525	3528	99.915
BABAM1	15401	15580	98.8511	2638	2656	99.3223
BACE1	30479	30571	99.6991	6007	6020	99.7841
BACE2	108130	108797	99.3869	2915	2993	97.3939
BACH1	62747	62998	99.6016	6715	6731	99.7623
BACH2	364757	370381	98.4816	9497	9609	98.8344
BAD	14306	14877	96.1619	1642	1646	99.757
BAG1	12206	12290	99.3165	3824	3872	98.7603
BAG2	12875	12909	99.7366	2251	2271	99.1193
BAG3	26057	26448	98.5216	2560	2569	99.6497
BAG4	36297	36714	98.8642	4449	4464	99.664
BAG5	6255	6271	99.7449	5247	5254	99.8668
BAG6	13560	13673	99.1736	3915	3963	98.7888
BAHD1	28193	28522	98.8465	4765	4771	99.8742
BAI1	78710	80992	97.1824	5390	5528	97.5036
BAI2	36730	36931	99.4557	6296	6314	99.7149
BAI3	744372	753772	98.7529	5855	5861	99.8976
BAIAP2	81241	82286	98.73	6039	6094	99.0975
BAIAP2-AS1	5479	5587	98.0669	4318	4421	97.6702
BAIAP2L1	107149	109466	97.8834	3656	3670	99.6185
BAIAP2L2	25358	25781	98.3593	2125	2145	99.0676
BAIAP3	15083	15837	95.239	5189	5218	99.4442
BAK1	7696	7748	99.3289	2327	2331	99.8284
BAMBI	5390	5445	98.9899	1689	1724	97.9698
BANF1	1981	2068	95.793	1113	1152	96.6146
BANF2	41929	42198	99.3625	640	640	100
BANK1	645333	654852	98.5464	3997	4001	99.9
BANP	122331	126687	96.5616	2982	2992	99.6658
BAP1	9045	9102	99.3738	3751	3770	99.496
BARD1	79977	81154	98.5497	2578	2594	99.3832
BARHL1	7585	7648	99.1763	1878	1907	98.4793
BARHL2	5172	5216	99.1564	1486	1496	99.3316
BARX1	3618	3700	97.7838	1652	1726	95.7126
BARX2	75949	76294	99.5478	1762	1767	99.717
BASP1	59151	60023	98.5472	1840	1963	93.7341
BASP1P1	1143	1152	99.2188	1143	1152	99.2188
BATF	24360	24551	99.222	939	940	99.8936
BATF2	9074	9101	99.7033	2840	2842	99.9296
BATF3	13371	13569	98.5408	897	981	91.4373
BAX	6724	6939	96.9016	1237	1256	98.4873
BAZ1A	121379	122917	98.7487	6271	6286	99.7614
BAZ1B	81385	81888	99.3857	6097	6115	99.7056
BAZ2A	40472	40784	99.235	9178	9252	99.2002
BAZ2B	389462	393457	98.9846	11527	11563	99.6887
BBC3	11589	11945	97.0197	2030	2095	96.8974
BBIP1	20557	20637	99.6123	2449	2460	99.5528
BBOX1	86104	86846	99.1456	1992	1995	99.8496
BBS1	24378	24535	99.3601	4080	4080	100
BBS10	3956	3957	99.9747	3582	3583	99.9721
BBS12	12172	12242	99.4282	3427	3432	99.8543
BBS2	35616	35750	99.6252	6313	6331	99.7157
BBS4	51507	52298	98.4875	3327	3337	99.7003
BBS5	26817	27160	98.7371	2950	3157	93.4431
BBS7	45999	46169	99.6318	4820	4825	99.8964
BBS9	464829	476529	97.5447	5629	5629	100
BBX	281670	288394	97.6685	9375	9406	99.6704
BCAM	12161	12363	98.3661	3287	3431	95.803
BCAN	17518	17585	99.619	4046	4050	99.9012
BCAP29	42717	43341	98.5603	6093	6098	99.918
BCAP31	22622	24255	93.2674	1737	2396	72.4958
BCAR1	38673	39024	99.1006	5872	5909	99.3738
BCAR3	275852	285364	96.6667	4539	4555	99.6487
BCAR4	8904	8998	98.9553	1307	1309	99.8472
BCAS1	126577	127226	99.4899	4261	4277	99.6259
BCAS2	13916	14085	98.8001	1299	1301	99.8463
BCAS3	697482	715028	97.5461	5105	5261	97.0348
BCAS4	81625	82248	99.2425	1715	1732	99.0185
BCAT1	138192	139436	99.1078	10173	10227	99.472
BCAT2	15503	16002	96.8816	4295	4302	99.8373
BCCIP	30016	30161	99.5192	4074	4077	99.9264
BCDIN3D	7042	7087	99.365	3211	3249	98.8304
BCDIN3D-AS1	12511	12612	99.1992	3086	3088	99.9352
BCHE	64073	64562	99.2426	2445	2447	99.9183
BCKDHA	48014	48473	99.0531	2514	2516	99.9205
BCKDHB	236555	239644	98.711	3704	3712	99.7845
BCKDK	4492	4498	99.8666	2220	2221	99.955
BCL10	11104	11128	99.7843	3094	3104	99.6778
BCL11A	100841	102332	98.543	7710	7761	99.3429
BCL11B	101096	102198	98.9217	7693	7815	98.4389
BCL2	194905	196079	99.4013	6870	6885	99.7821
BCL2A1	10369	10412	99.587	943	943	100
BCL2L1	59171	59469	99.4989	2777	2779	99.928
BCL2L10	3109	3151	98.6671	875	887	98.6471
BCL2L11	47154	47532	99.2047	6176	6212	99.4205
BCL2L12	8757	8775	99.7949	1900	1904	99.7899
BCL2L13	100203	101940	98.2961	6111	6121	99.8366
BCL2L14	138677	140070	99.0055	2721	2722	99.9633
BCL2L15	10688	10734	99.5715	5593	5605	99.7859
BCL2L2	4995	4998	99.94	3710	3712	99.9461
BCL2L2-PABPN1	19270	19424	99.2072	2115	2130	99.2958
BCL3	10928	11324	96.503	1838	1864	98.6052
BCL6	24038	24349	98.7227	3899	3975	98.0881
BCL6B	6561	6593	99.5146	3547	3570	99.3557
BCL7A	39136	40090	97.6204	3618	3714	97.4152
BCL7B	21171	21383	99.0086	2628	2684	97.9136
BCL7C	58413	59130	98.7874	1033	1058	97.6371
BCL9	84330	84834	99.4059	6256	6276	99.6813
BCL9L	14623	14763	99.0517	7647	7738	98.824
BCLAF1	32865	32989	99.6241	7922	7985	99.211
BCMO1	51961	52452	99.0639	2679	2680	99.9627
BCO2	48743	49215	99.0409	4742	4743	99.9789
BCOR	115735	126084	91.792	6888	7220	95.4017
BCORL1	52055	52895	98.4119	7195	7349	97.9045
BCR	135025	140673	95.985	8241	12438	66.2566
BCRP2	12659	19271	65.6894	690	2334	29.563
BCRP3	15796	20446	77.2572	1022	1425	71.7193
BCS1L	3787	3788	99.9736	2131	2132	99.9531
BCYRN1	489735	518928	94.3744	154	180	85.5556
BDH1	61332	63541	96.5235	3547	3689	96.1507
BDH2	22012	22243	98.9615	2920	2920	100
BDKRB1	8498	8554	99.3453	1301	1301	100
BDKRB2	39165	39532	99.0716	6798	6889	98.6791
BDNF	66078	67164	98.3831	7628	7729	98.6932
BDNF-AS	187658	191320	98.0859	3337	3339	99.9401
BDP1	110269	112208	98.272	11650	11654	99.9657
BEAN1	65706	66233	99.2043	3513	3520	99.8011
BECN1	14083	14161	99.4492	2813	2813	100
BEGAIN	32237	32648	98.7411	2885	2924	98.6662
BEND2	55561	57974	95.8378	4596	4696	97.8705
BEND3	48791	49252	99.064	6644	6660	99.7598
BEND3P3	5561	5920	93.9358	5561	5920	93.9358
BEND4	41847	42026	99.5741	8905	8946	99.5417
BEND5	48902	49008	99.7837	1382	1410	98.0142
BEND6	71777	72370	99.1806	5684	5743	98.9727
BEND7	64147	64493	99.4635	9179	9185	99.9347
BEST1	14465	14580	99.2112	4477	4512	99.2243
BEST2	5852	5865	99.7783	1903	1910	99.6335
BEST3	55529	55863	99.4021	5341	5343	99.9626
BEST4	4154	4170	99.6163	2085	2096	99.4752
BET1	41539	41609	99.8318	6261	6265	99.9362
BET1L	4484	4499	99.6666	2948	2956	99.7294
BEX1	1162	1588	73.1738	762	862	88.3991
BEX2	1385	1701	81.4227	975	1176	82.9082
BEX4	1988	2109	94.2627	1262	1282	98.4399
BEX5	2220	2308	96.1872	974	1017	95.7719
BFAR	36205	36426	99.3933	3040	3043	99.9014
BFSP1	74716	75316	99.2034	2994	3008	99.5346
BFSP2	72945	75267	96.915	1626	1626	100
BGLAP	1173	1173	100	545	545	100
BGN	13632	14658	93.0004	2252	2444	92.144
BHLHA15	1458	1494	97.5904	731	737	99.1859
BHLHA9	680	708	96.0452	680	708	96.0452
BHLHB9	31366	31728	98.8591	4247	4281	99.2058
BHLHE22	3355	3397	98.7636	3355	3397	98.7636
BHLHE23	1026	1057	97.0672	1026	1057	97.0672
BHLHE40	5707	5769	98.9253	3267	3303	98.9101
BHLHE40-AS1	76995	83154	92.5933	2717	2718	99.9632
BHLHE41	4953	5045	98.1764	3698	3780	97.8307
BHMT	20445	20510	99.6831	2497	2500	99.88
BHMT2	20242	20351	99.4644	2643	2651	99.6982
BICC1	308366	315942	97.6021	3447	3447	100
BICD1	264888	270957	97.7602	3930	3933	99.9237
BICD2	53113	53439	99.39	6402	6416	99.7818
BID	39939	40526	98.5515	2749	2755	99.7822
BIK	18866	18965	99.478	950	953	99.6852
BIN1	58897	59305	99.312	2930	2948	99.3894
BIN2	43011	43631	98.579	2935	2937	99.9319
BIN3	48482	48715	99.5217	1838	1847	99.5127
BIRC2	26230	31489	83.2989	4260	4265	99.8828
BIRC3	21888	21955	99.6948	6892	6912	99.7106
BIRC5	11313	11440	98.8899	3077	3093	99.4827
BIRC6	258032	261870	98.5344	15688	15702	99.9108
BIRC7	4558	4579	99.5414	1444	1446	99.8617
BIRC8	2018	2022	99.8022	2018	2022	99.8022
BIVM	42318	42490	99.5952	5182	5200	99.6538
BIVM-ERCC5	68675	68856	99.7371	5140	5143	99.9417
BLCAP	10345	10515	98.3833	2538	2540	99.9213
BLID	862	862	100	862	862	100
BLK	70221	70588	99.4801	4293	4299	99.8604
BLM	97488	98108	99.368	4801	4804	99.9376
BLMH	43839	43972	99.6975	2525	2537	99.527
BLNK	79461	79879	99.4767	1826	1828	99.8906
BLOC1S1	4047	4054	99.8273	1659	1659	100
BLOC1S2	11466	13435	85.3443	2913	2920	99.7603
BLOC1S3	3012	3056	98.5602	2557	2600	98.3462
BLOC1S4	1533	1546	99.1591	1533	1546	99.1591
BLOC1S5	50406	50848	99.1307	2977	2980	99.8993
BLOC1S5-TXNDC5	179325	183165	97.9035	3337	3352	99.5525
BLOC1S6	20484	22493	91.0683	4313	4321	99.8149
BLVRA	45449	48670	93.382	1173	1175	99.8298
BLVRB	17541	18035	97.2609	854	856	99.7664
BLZF1	28379	28587	99.2724	3811	3812	99.9738
BMF	20884	20995	99.4713	4773	4778	99.8954
BMI1	10037	10276	97.6742	3421	3430	99.7376
BMP1	46817	47188	99.2138	5309	5337	99.4754
BMP10	6036	6037	99.9834	1584	1584	100
BMP15	5889	5907	99.6953	1261	1262	99.9208
BMP2	12134	12166	99.737	3133	3150	99.4603
BMP2K	135362	135810	99.6701	4635	4685	98.9328
BMP3	26480	26567	99.6725	5690	5734	99.2326
BMP4	6996	7100	98.5352	2110	2128	99.1541
BMP5	119684	120138	99.6221	2166	2170	99.8157
BMP6	154166	154951	99.4934	3052	3105	98.2931
BMP7	96523	97899	98.5945	4216	4235	99.5514
BMP8A	36758	38224	96.1647	5454	5626	96.9428
BMP8B	28735	30631	93.8102	3789	4094	92.5501
BMPER	244092	250962	97.2625	4981	5031	99.0062
BMPR1A	166871	168550	99.0039	3540	3616	97.8982
BMPR1B	390637	400474	97.5437	5942	5997	99.0829
BMPR2	188670	191425	98.5608	12132	12162	99.7533
BMS1	51989	52432	99.1551	7985	8048	99.2172
BMS1P1	15728	50536	31.1224	2053	8467	24.2471
BMS1P4	30154	31364	96.1421	2369	2421	97.8521
BMS1P6	26289	60440	43.496	5394	9768	55.2211
BMX	89650	92284	97.1458	2862	2864	99.9302
BNC1	28704	28814	99.6182	4766	4792	99.4574
BNC2	456704	461286	99.0067	15475	15575	99.3579
BNIP1	19788	19946	99.2079	1389	1394	99.6413
BNIP2	26441	26581	99.4733	2711	2712	99.9631
BNIP3	14190	14232	99.7049	2481	2485	99.839
BNIP3L	24793	30122	82.3086	3717	3729	99.6782
BNIPL	10948	11048	99.0949	2563	2566	99.8831
BOC	75585	75894	99.5929	8833	8861	99.684
BOD1	9503	9519	99.8319	1921	1934	99.3278
BOD1L1	58730	58963	99.6048	13427	13483	99.5847
BOD1L2	3320	3347	99.1933	3320	3347	99.1933
BOK	14156	15408	91.8744	2317	2647	87.5331
BOK-AS1	14582	14758	98.8074	768	826	92.9782
BOLA1	1192	1194	99.8325	855	857	99.7666
BOLA2	633636	661305	95.816	3242	3851	84.1859
BOLA3	12419	12512	99.2567	554	554	100
BOLA3-AS1	4366	4409	99.0247	4148	4190	98.9976
BOLL	53833	59336	90.7257	3474	3518	98.7493
BOP1	23582	43240	54.5375	1846	4366	42.2813
BORA	28184	28287	99.6359	3025	3026	99.967
BPESC1	18823	20979	89.7231	3476	3514	98.9186
BPGM	32618	33037	98.7317	2105	2105	100
BPHL	32768	34507	94.9604	1912	1915	99.8433
BPI	66285	67072	98.8266	4698	4702	99.9149
BPIFA1	7269	7314	99.3847	1078	1078	100
BPIFA2	13249	13264	99.8869	1051	1052	99.9049
BPIFA3	10391	10425	99.6739	1108	1109	99.9098
BPIFA4P	16793	16858	99.6144	1219	1220	99.918
BPIFB1	26499	26744	99.0839	3125	3131	99.8084
BPIFB2	16108	16132	99.8512	1913	1920	99.6354
BPIFB3	18057	18205	99.187	1453	1454	99.9312
BPIFB4	29950	30240	99.041	2171	2174	99.862
BPIFB6	12386	12400	99.8871	1676	1676	100
BPIFC	49785	50600	98.3893	2275	2276	99.9561
BPNT1	31693	32368	97.9146	2459	2461	99.9187
BPTF	156835	158715	98.8155	11776	11912	98.8583
BRAF	186928	190752	97.9953	2940	2946	99.7963
BRAP	43572	43841	99.3864	4142	4149	99.8313
BRAT1	17635	17949	98.2506	5571	5615	99.2164
BRCA1	125018	126109	99.1349	8208	8220	99.854
BRCA2	83789	84193	99.5202	11384	11386	99.9824
BRCC3	51206	51655	99.1308	2866	2932	97.749
BRD1	53496	54260	98.592	5320	5368	99.1058
BRD2	12667	12846	98.6066	5584	5664	98.5876
BRD3	37642	38210	98.5135	6001	6109	98.2321
BRD4	93899	95042	98.7974	8160	8555	95.3828
BRD7	48923	49917	98.0087	2268	2312	98.0969
BRD7P3	2453	2461	99.6749	2453	2461	99.6749
BRD8	38507	38900	98.9897	5087	5096	99.8234
BRD9	28463	29090	97.8446	4487	4496	99.7998
BRDT	64067	65058	98.4767	4048	4051	99.9259
BRE	444314	448286	99.114	2105	2112	99.6686
BRF1	92421	106292	86.9501	6659	6684	99.626
BRF2	6007	6034	99.5525	2000	2000	100
BRI3	11081	11297	98.088	960	1116	86.0215
BRI3BP	31339	32156	97.4593	1243	1272	97.7201
BRICD5	1804	1816	99.3392	1118	1127	99.2014
BRIP1	182426	184374	98.9435	9206	9230	99.74
BRIX1	9907	9968	99.388	3730	3735	99.8661
BRK1	11394	11542	98.7177	1176	1176	100
BRMS1	7764	7779	99.8072	1976	1980	99.798
BRMS1L	45144	45573	99.0587	2696	2697	99.9629
BROX	20172	20201	99.8564	2034	2038	99.8037
BRPF1	16183	16266	99.4897	4708	4728	99.577
BRPF3	35838	36018	99.5002	6010	6038	99.5363
BRS3	4414	4474	98.6589	1410	1413	99.7877
BRSK1	29804	30464	97.8335	3401	3609	94.2366
BRSK2	64643	72791	88.8063	6236	6496	95.9975
BRWD1	126944	128309	98.9362	19808	19881	99.6328
BRWD1-AS1	7489	7512	99.6938	691	691	100
BRWD1-IT2	1015	1028	98.7354	1015	1028	98.7354
BRWD3	129335	140247	92.2194	12892	13327	96.7359
BSCL2	19114	19358	98.7395	2593	2598	99.8075
BSDC1	29227	29358	99.5538	4804	4810	99.8753
BSG	11716	12217	95.8992	3002	3041	98.7175
BSN	115057	117061	98.2881	15877	15959	99.4862
BSN-AS2	5053	5061	99.8419	2595	2603	99.6927
BSND	9700	9849	98.4872	1369	1370	99.927
BSPH1	23556	24125	97.6415	652	654	99.6942
BSPRY	21520	21702	99.1614	2331	2348	99.276
BST1	29002	29224	99.2404	1474	1480	99.5946
BST2	2478	2630	94.2205	933	939	99.361
BSX	3964	4023	98.5334	700	702	99.7151
BTAF1	105329	106345	99.0446	7262	7267	99.9312
BTBD1	50309	50926	98.7884	3276	3290	99.5745
BTBD10	72430	75283	96.2103	3225	3233	99.7526
BTBD11	339314	341223	99.4405	7610	7659	99.3602
BTBD16	66606	66856	99.6261	1848	1851	99.8379
BTBD17	5348	5404	98.9637	1660	1678	98.9273
BTBD18	8214	8268	99.3469	3184	3186	99.9372
BTBD19	5584	5648	98.8669	1635	1637	99.8778
BTBD2	29686	30256	98.1161	3933	4218	93.2432
BTBD3	35555	35767	99.4073	5340	5345	99.9065
BTBD6	2446	2552	95.8464	1941	1987	97.685
BTBD7	94810	95490	99.2879	11152	11203	99.5448
BTBD8	67151	67540	99.424	1788	1789	99.9441
BTBD9	466285	471698	98.8524	9369	9451	99.1324
BTC	48039	48435	99.1824	1321	1323	99.8488
BTD	44030	44186	99.6469	2707	2710	99.8893
BTF3	7133	7199	99.0832	1697	1698	99.9411
BTF3L4	34037	34532	98.5665	4623	4643	99.5692
BTF3P11	639	640	99.8438	639	640	99.8438
BTG1	5604	5620	99.7153	4666	4680	99.7009
BTG2	4013	4066	98.6965	2707	2711	99.8525
BTG3	19212	19301	99.5389	1584	1594	99.3726
BTG4	44722	44824	99.7724	1123	1124	99.911
BTK	40005	41336	96.78	3592	3644	98.573
BTLA	35403	35596	99.4578	3202	3215	99.5956
BTN1A1	9169	9195	99.7172	2880	2888	99.723
BTN2A1	18665	18697	99.8288	3646	3650	99.8904
BTN2A2	11734	11777	99.6349	5829	5840	99.8116
BTN2A3P	9596	9612	99.8335	2425	2428	99.8764
BTN3A1	12880	12980	99.2296	4181	4191	99.7614
BTN3A2	12893	13151	98.0382	4033	4109	98.1504
BTN3A3	12863	12944	99.3742	2994	3002	99.7335
BTNL2	12254	12388	98.9183	1364	1368	99.7076
BTNL3	17670	17883	98.8089	2547	2548	99.9608
BTNL8	46747	51830	90.1929	2408	2414	99.7514
BTNL9	20408	21299	95.8167	4216	4237	99.5044
BTRC	200302	203289	98.5307	6164	6164	100
BUB1	40118	40276	99.6077	4215	4216	99.9763
BUB1B	59735	60128	99.3464	3757	3757	100
BUB3	11104	11127	99.7933	3746	3755	99.7603
BUD13	24703	24829	99.4925	2488	2490	99.9197
BUD31	10577	10648	99.3332	1321	1328	99.4729
BVES	39736	40351	98.4759	5689	5787	98.3065
BVES-AS1	32209	32258	99.8481	1715	1715	100
BYSL	11764	11820	99.5262	1990	1990	100
BZRAP1	27478	27565	99.6844	7688	7698	99.8701
BZRAP1-AS1	28052	28278	99.2008	2950	2999	98.3661
BZW1	12204	12301	99.2114	3591	3669	97.8741
BZW2	60124	60390	99.5595	3417	3426	99.7373
C10orf10	2611	2622	99.5805	2049	2060	99.466
C10orf105	26077	26124	99.8201	4925	4934	99.8176
C10orf107	102184	103373	98.8498	1250	1252	99.8403
C10orf11	759169	774608	98.0069	892	892	100
C10orf111	1932	1935	99.845	1712	1714	99.8833
C10orf113	20709	20797	99.5769	613	614	99.8371
C10orf118	51915	52391	99.0914	8119	8129	99.877
C10orf12	4542	4545	99.934	4542	4545	99.934
C10orf120	2093	2114	99.0066	1064	1064	100
C10orf128	32330	32517	99.4249	2496	2497	99.96
C10orf129	33735	34730	97.135	1792	1794	99.8885
C10orf131	30543	30694	99.508	1176	1176	100
C10orf2	6691	6866	97.4512	3773	3785	99.683
C10orf25	3322	3325	99.9098	3209	3212	99.9066
C10orf32	10639	10752	98.949	2429	2435	99.7536
C10orf35	3314	3353	98.8369	1073	1076	99.7212
C10orf40	5432	5484	99.0518	4553	4602	98.9352
C10orf53	29170	29273	99.6481	2978	2978	100
C10orf54	25539	26024	98.1363	4753	4773	99.581
C10orf55	12728	12809	99.3676	2496	2513	99.3235
C10orf62	1239	1242	99.7585	1239	1242	99.7585
C10orf67	27238	28253	96.4075	2914	2943	99.0146
C10orf71	28238	28351	99.6014	5237	5286	99.073
C10orf76	208822	210577	99.1666	4285	4290	99.8834
C10orf82	6517	6569	99.2084	2300	2313	99.438
C10orf88	21546	23501	91.6812	3083	3087	99.8704
C10orf90	243187	245506	99.0554	4641	4645	99.9139
C10orf91	3107	3112	99.8393	738	738	100
C10orf95	1668	1707	97.7153	1430	1469	97.3451
C10orf99	11363	11497	98.8345	828	828	100
C11orf1	4845	4850	99.8969	1823	1823	100
C11orf16	12855	12931	99.4123	1923	1925	99.8961
C11orf21	5396	5637	95.7247	2260	2262	99.9116
C11orf24	10404	10667	97.5345	2083	2102	99.0961
C11orf30	105876	106521	99.3945	9423	9430	99.9258
C11orf31	2159	2162	99.8612	1291	1294	99.7682
C11orf35	5635	5930	95.0253	2053	2098	97.8551
C11orf40	6339	6398	99.0778	653	654	99.8471
C11orf42	5548	5568	99.6408	1140	1143	99.7375
C11orf44	44321	44397	99.8288	3547	3547	100
C11orf45	6634	6667	99.505	3856	3867	99.7155
C11orf48	8898	8953	99.3857	1627	1628	99.9386
C11orf49	217684	227692	95.6046	2527	2528	99.9604
C11orf53	29965	30266	99.0055	1051	1051	100
C11orf54	21250	21455	99.0445	3979	4020	98.9801
C11orf57	10831	10907	99.3032	5559	5597	99.3211
C11orf58	19607	19754	99.2558	3949	3980	99.2211
C11orf63	76892	77195	99.6075	3861	3864	99.9224
C11orf65	147476	159013	92.7446	3314	3316	99.9397
C11orf68	2205	2249	98.0436	1517	1558	97.3684
C11orf70	36992	37123	99.6471	2494	2498	99.8399
C11orf71	8930	9103	98.0995	2229	2235	99.7315
C11orf72	1956	1959	99.8469	1170	1173	99.7442
C11orf73	41440	43733	94.7568	1347	1347	100
C11orf74	78426	80348	97.6079	3074	3075	99.9675
C11orf80	97760	98781	98.9664	2311	2326	99.3551
C11orf82	56324	56583	99.5423	4640	4645	99.8924
C11orf83	2000	2037	98.1836	1913	1950	98.1026
C11orf84	14134	14268	99.0608	1906	1961	97.1953
C11orf85	33178	33629	98.6589	1818	1820	99.8901
C11orf86	1724	1726	99.8841	1183	1185	99.8312
C11orf87	6982	7048	99.0636	5900	5937	99.3768
C11orf88	22188	22247	99.7348	3090	3100	99.6774
C11orf91	2550	2633	96.8477	921	983	93.6928
C11orf94	748	748	100	368	368	100
C11orf95	8594	8750	98.2171	5513	5582	98.7639
C11orf96	1225	1328	92.244	1225	1328	92.244
C12orf10	7442	7496	99.2796	2041	2042	99.951
C12orf23	18136	18270	99.2666	3354	3395	98.7923
C12orf29	14664	14670	99.9591	2872	2874	99.9304
C12orf36	6059	6075	99.7366	3195	3202	99.7814
C12orf39	4950	4955	99.8991	854	858	99.5338
C12orf4	45891	50737	90.4488	3819	3819	100
C12orf40	270597	282131	95.9118	4368	4380	99.726
C12orf42	251185	258381	97.215	3293	3300	99.7879
C12orf43	13247	13453	98.4687	2269	2273	99.824
C12orf44	7516	7522	99.9202	1437	1437	100
C12orf45	8394	8408	99.8335	622	622	100
C12orf49	22149	22248	99.555	2772	2775	99.8919
C12orf5	37455	38832	96.454	8170	8225	99.3313
C12orf50	48844	49361	98.9526	4131	4431	93.2295
C12orf54	13957	14012	99.6075	1088	1088	100
C12orf55	72992	74774	97.6168	4630	4876	94.9549
C12orf56	114545	123583	92.6867	2166	2169	99.8617
C12orf57	3013	3025	99.6033	1338	1345	99.4796
C12orf60	20193	20286	99.5416	1125	1126	99.9112
C12orf61	1673	1684	99.3468	1673	1684	99.3468
C12orf65	24376	24663	98.8363	3159	3162	99.9051
C12orf66	23882	29658	80.5246	2600	2600	100
C12orf68	2294	2344	97.8669	2294	2344	97.8669
C12orf71	1466	1466	100	966	966	100
C12orf73	15248	15493	98.4186	1972	1994	98.8967
C12orf74	5707	5707	100	2369	2369	100
C12orf75	40523	40883	99.1194	1322	1366	96.7789
C12orf76	32271	32457	99.4269	4522	4524	99.9558
C12orf77	4058	4089	99.2419	2298	2309	99.5236
C13orf35	36560	37454	97.6131	2235	2241	99.7323
C13orf45	12716	12775	99.5382	1164	1168	99.6575
C14orf1	10210	10306	99.0685	1514	1540	98.3117
C14orf105	23924	23982	99.7582	3131	3138	99.7769
C14orf119	4890	4983	98.1337	2917	2945	99.0492
C14orf132	54158	54566	99.2523	7557	7583	99.6571
C14orf142	4214	4223	99.7869	1175	1176	99.915
C14orf159	110467	111347	99.2097	4156	4158	99.9519
C14orf166	15175	15193	99.8815	1051	1051	100
C14orf166B	43132	43921	98.2036	2288	2295	99.695
C14orf169	2435	2462	98.9033	2433	2460	98.9024
C14orf177	6131	6154	99.6263	1289	1289	100
C14orf178	8798	8913	98.7097	646	646	100
C14orf180	10070	10128	99.4273	2100	2115	99.2908
C14orf182	25633	25809	99.3181	2681	2686	99.8138
C14orf183	8952	8993	99.5441	974	975	99.8974
C14orf2	9145	9279	98.5559	2332	2342	99.573
C14orf23	22011	22091	99.6379	3714	3730	99.571
C14orf28	9892	9954	99.3771	3739	3764	99.3358
C14orf37	285311	294048	97.0287	3693	3698	99.8648
C14orf39	49401	50091	98.6225	2761	2763	99.9276
C14orf64	52097	52515	99.204	5297	5324	99.4929
C14orf79	9183	9240	99.3831	1965	1966	99.9491
C14orf80	9224	9394	98.1903	2228	2255	98.8027
C14orf93	23016	23251	98.9893	2615	2617	99.9236
C15orf26	49108	49768	98.6738	1824	1824	100
C15orf27	168094	169164	99.3675	3233	3244	99.6609
C15orf32	28783	29441	97.765	1763	1764	99.9433
C15orf37	2075	2084	99.5681	2075	2084	99.5681
C15orf38	12356	12391	99.7175	2659	2667	99.7
C15orf38-AP3S2	77752	82392	94.3684	6243	6256	99.7922
C15orf39	13149	13278	99.0285	5437	5468	99.4331
C15orf40	20721	22679	91.3665	2649	2656	99.7364
C15orf41	226800	230638	98.3359	2962	2971	99.6971
C15orf43	21990	22522	97.6379	1273	1275	99.8431
C15orf48	2915	2921	99.7946	951	953	99.7901
C15orf52	9506	9516	99.8949	7282	7292	99.8629
C15orf53	3439	3441	99.9419	2041	2043	99.9021
C15orf54	4158	4164	99.8559	3075	3080	99.8377
C15orf56	2241	2245	99.8218	2125	2127	99.906
C15orf57	33432	33715	99.1606	3234	3289	98.3278
C15orf59	11527	11676	98.7239	1282	1344	95.3869
C15orf60	107823	116855	92.2708	922	925	99.6757
C15orf61	6085	6120	99.4281	1291	1297	99.5374
C15orf62	2490	2490	100	2490	2490	100
C16orf11	4929	5108	96.4957	2182	2217	98.4213
C16orf13	1902	1919	99.1141	1360	1373	99.0532
C16orf3	986	994	99.1952	986	994	99.1952
C16orf45	152711	153792	99.2971	2338	2342	99.8292
C16orf46	23585	23771	99.2175	2220	2226	99.7305
C16orf52	78907	79397	99.3828	5016	5193	96.5916
C16orf54	3521	3555	99.0436	2562	2596	98.6903
C16orf58	18887	18945	99.6939	3307	3309	99.9396
C16orf59	4792	4850	98.8041	3198	3247	98.4909
C16orf62	144640	145749	99.2391	4617	4637	99.5687
C16orf70	38265	38577	99.1912	5098	5106	99.8433
C16orf71	14922	15109	98.7623	2694	2706	99.5565
C16orf72	27872	28019	99.4754	3959	3979	99.4974
C16orf74	42883	43566	98.4323	865	897	96.4326
C16orf78	24575	25512	96.3272	969	971	99.794
C16orf80	15603	15800	98.7532	1579	1583	99.7473
C16orf82	2259	2269	99.5593	2259	2269	99.5593
C16orf86	1938	1945	99.6401	1785	1791	99.665
C16orf87	28933	29116	99.3715	1383	1383	100
C16orf89	21748	22024	98.7468	1904	1907	99.8427
C16orf90	1936	1938	99.8968	903	904	99.8894
C16orf91	9494	9601	98.8855	1481	1481	100
C16orf92	1367	1369	99.8539	894	895	99.8883
C16orf93	4814	4822	99.8341	2418	2420	99.9174
C16orf95	14465	14623	98.9195	1159	1161	99.8277
C16orf96	43215	43828	98.6014	3420	3426	99.8249
C16orf97	47377	47584	99.565	448	448	100
C16orf98	1566	1568	99.8724	1094	1095	99.9087
C17orf100	1557	1559	99.8717	1555	1557	99.8715
C17orf102	5240	5247	99.8666	3990	3997	99.8249
C17orf103	14255	14395	99.0274	4752	4783	99.3519
C17orf104	21676	21897	98.9907	6742	6800	99.1471
C17orf105	4252	4252	100	827	827	100
C17orf107	3274	3280	99.8171	3167	3173	99.8109
C17orf112	2132	2133	99.9531	835	835	100
C17orf47	2784	2786	99.9282	2126	2127	99.953
C17orf50	4122	4183	98.5417	1029	1031	99.806
C17orf51	45934	46161	99.5082	8640	8650	99.8844
C17orf53	20475	20571	99.5333	2723	2725	99.9266
C17orf58	2513	2549	98.5877	1543	1564	98.6573
C17orf59	1909	1914	99.7388	1909	1914	99.7388
C17orf61-PLSCR3	14247	14404	98.91	2561	2597	98.6138
C17orf62	8012	8245	97.174	5864	5926	98.9538
C17orf64	8878	8923	99.4957	953	960	99.2708
C17orf66	13798	13936	99.0098	2875	2876	99.9652
C17orf67	41446	41983	98.7209	2000	2012	99.4036
C17orf70	12313	12519	98.3545	4641	4669	99.4003
C17orf72	5879	5934	99.0731	3337	3359	99.345
C17orf74	1926	1952	98.668	1626	1649	98.6052
C17orf75	13724	13769	99.6732	4577	4583	99.8691
C17orf77	9241	9292	99.4511	2521	2525	99.8416
C17orf78	16050	16678	96.2346	1861	1862	99.9463
C17orf80	16572	16724	99.0911	4072	4073	99.9754
C17orf82	1519	1530	99.281	1519	1530	99.281
C17orf85	38097	39501	96.4457	9715	9727	99.8766
C17orf89	1972	1994	98.8967	555	566	98.0565
C17orf96	3186	3229	98.6683	3186	3229	98.6683
C17orf97	13089	13399	97.6864	2406	2557	94.0946
C17orf98	6207	6302	98.4925	565	566	99.8233
C17orf99	19679	19931	98.7356	2642	2657	99.4355
C18orf21	6615	6663	99.2796	1123	1127	99.6451
C18orf25	92154	92968	99.1244	5433	5465	99.4145
C18orf32	5960	6097	97.753	1643	1653	99.395
C18orf42	53435	53584	99.7219	2284	2302	99.2181
C18orf54	24028	24117	99.631	6367	6389	99.6557
C18orf56	8558	8721	98.1309	840	844	99.5261
C18orf63	43238	43313	99.8268	5055	5065	99.8026
C18orf8	28178	28338	99.4354	2205	2226	99.0566
C19orf10	12319	12859	95.8006	1030	1051	98.0019
C19orf12	16554	16904	97.9295	5034	5060	99.4862
C19orf18	15925	16098	98.9253	914	915	99.8907
C19orf24	3683	3724	98.899	960	978	98.1595
C19orf25	17208	17467	98.5172	2434	2439	99.795
C19orf26	7617	8044	94.6917	2487	2564	96.9969
C19orf33	828	843	98.2206	509	520	97.8846
C19orf35	7079	7551	93.7492	2529	2570	98.4047
[truncated: 20,015 more rows]
