# Supplementary material for: A reference data set of 5.4 million phased human variants validated by genetic inheritance from sequencing a three-generation 17-member pedigree
Source: HighWire-hosted journal article supplement (doi:10.1101/gr.210500.116), 2016-11-30
Supplement: Supplemental_Table_S14.xlsx [file Supplemental_Table_S14.xlsx]

## Sheet: Sudmant et al. CNVs
Chrom	Start	Stop	Size	Type	Bi-Allelic	Platinum Variants	Cat1 Failures	Cat2 Failures	Cat3 Failures	Cat4 Failures
chr1	12048	177033	164986	DUP	FALSE	1	10	0	2	22
chr1	12048	89237	77190	DUP	FALSE	0	0	0	0	0
chr1	228416	267160	38745	DUP	FALSE	0	27	0	2	27
chr1	318047	352288	34242	DUP	FALSE	0	0	0	0	0
chr1	318047	471226	153180	DUP	FALSE	0	0	0	0	2
chr1	461963	471226	9264	DUP	FALSE	0	0	0	0	0
chr1	471226	471326	101	DUP	FALSE	0	0	0	0	0
chr1	521526	572534	51009	DUP	FALSE	6	5	0	2	41
chr1	563872	572534	8663	DUP	FALSE	3	0	0	1	4
chr1	563872	712534	148663	DUP	FALSE	26	12	0	2	25
chr1	712534	763301	50768	DUP	FALSE	89	55	0	0	3
chr1	763301	763482	182	DUP	FALSE	0	0	0	0	0
chr1	763904	768698	4795	DUP	FALSE	6	0	0	0	0
chr1	763904	769541	5638	DUP	FALSE	8	0	0	0	0
chr1	766955	768698	1744	DUP	FALSE	3	0	0	0	0
chr1	769541	787076	17536	DUP	FALSE	31	0	0	0	2
chr1	787076	787479	404	DUP	FALSE	8	0	0	0	0
chr1	787479	795270	7792	DUP	FALSE	13	0	0	0	0
chr1	787479	787679	201	DUP	FALSE	1	0	0	0	0
chr1	795270	797682	2413	DUP	FALSE	4	0	0	0	3
chr1	797682	801200	3519	DUP	FALSE	7	0	0	0	0
chr1	797682	805820	8139	DUP	FALSE	14	0	0	0	1
chr1	801200	802690	1491	DUP	FALSE	4	0	0	0	1
chr1	801200	805820	4621	DUP	FALSE	7	0	0	0	1
chr1	802690	805820	3131	DUP	FALSE	3	0	0	0	0
chr1	810543	811145	603	DUP	FALSE	1	0	0	0	0
chr1	811145	812525	1381	DUP	FALSE	2	4	0	0	3
chr1	812525	834148	21624	DUP	FALSE	37	272	0	1	28
chr1	812525	826611	14087	DUP	FALSE	16	255	0	1	26
chr1	814941	834148	19208	DUP	FALSE	30	248	0	1	25
chr1	817358	834148	16791	DUP	FALSE	29	210	0	1	18
chr1	826611	834148	7538	DUP	FALSE	21	17	0	0	2
chr1	834148	851364	17217	DUP	TRUE	21	3	0	0	1
chr1	848625	851570	2946	DUP	TRUE	7	0	0	0	0
chr1	853141	881226	28086	DUP	TRUE	78	0	0	0	3
chr1	874277	878854	4578	DUP	TRUE	8	0	0	0	0
chr1	895100	898155	3056	DUP	TRUE	6	1	0	1	0
chr1	1009660	1015541	5882	DEL	TRUE	13	1	0	1	1
chr1	1051484	1053875	2392	DUP	TRUE	1	0	0	0	0
chr1	1086514	1091066	4553	DUP	FALSE	7	0	0	0	0
chr1	1142466	1143903	1438	DEL	TRUE	5	0	0	0	0
chr1	1242403	1245425	3023	DUP	TRUE	4	0	0	2	0
chr1	1385229	1397291	12063	DUP	FALSE	35	0	0	0	0
chr1	1385229	1412752	27524	DUP	FALSE	40	0	0	0	0
chr1	1386045	1387439	1395	DUP	FALSE	3	0	0	0	0
chr1	1387439	1387832	394	DUP	FALSE	3	0	0	0	0
chr1	1387439	1392577	5139	DUP	FALSE	29	0	0	0	0
chr1	1387832	1389392	1561	DUP	FALSE	8	0	0	0	0
chr1	1396080	1397291	1212	DUP	FALSE	0	0	0	0	0
chr1	1397977	1443447	45471	DUP	FALSE	15	2	0	1	2
chr1	1397977	1398627	651	DUP	TRUE	0	0	0	0	0
chr1	1397977	1403308	5332	DUP	FALSE	1	0	0	0	0
chr1	1398627	1408066	9440	DUP	FALSE	2	0	0	0	0
chr1	1398627	1403308	4682	DUP	FALSE	1	0	0	0	0
chr1	1403308	1412752	9445	DUP	FALSE	4	0	0	0	0
chr1	1408066	1410530	2465	DUP	FALSE	1	0	0	0	0
chr1	1408066	1431547	23482	DUP	FALSE	10	2	0	0	0
chr1	1410530	1412752	2223	DUP	FALSE	2	0	0	0	0
chr1	1414262	1415965	1704	DUP	FALSE	1	0	0	0	0
chr1	1414262	1430752	16491	DUP	FALSE	7	0	0	0	0
chr1	1415965	1417048	1084	DUP	FALSE	1	0	0	0	0
chr1	1417048	1431547	14500	DUP	FALSE	5	0	0	0	0
chr1	1568056	1576070	8015	DUP	FALSE	7	0	0	0	3
chr1	1568056	1583645	15590	DUP	FALSE	12	12	0	1	9
chr1	1571353	1581769	10417	DUP	FALSE	10	2	0	1	7
chr1	1571353	1577258	5906	DUP	FALSE	7	0	0	1	3
chr1	1571353	1572746	1394	DUP	FALSE	2	0	0	0	0
chr1	1572746	1576070	3325	DUP	FALSE	5	0	0	0	3
chr1	1583097	1583645	549	DUP	FALSE	0	2	0	0	1
chr1	1587457	1593452	5996	DUP	FALSE	16	4	0	0	0
chr1	1587457	1601225	13769	DUP	FALSE	40	4	0	0	1
chr1	1589004	1597176	8173	DUP	FALSE	30	0	0	0	1
chr1	1593452	1601225	7774	DUP	FALSE	24	0	0	0	1
chr1	1593452	1603222	9771	DUP	TRUE	28	0	0	0	1
chr1	1605903	1607184	1282	DUP	FALSE	7	0	0	0	0
chr1	1605903	1608165	2263	DUP	FALSE	7	0	0	0	0
chr1	1607184	1638357	31174	DUP	FALSE	72	0	0	0	3
chr1	1607184	1608165	982	DUP	FALSE	0	0	0	0	0
chr1	1610214	1614123	3910	DUP	FALSE	8	0	0	0	0
chr1	1614123	1678253	64131	DUP	TRUE	206	63	0	2	12
chr1	1623360	1631312	7953	DUP	FALSE	16	0	0	0	2
chr1	1623360	1633710	10351	DUP	FALSE	17	0	0	0	2
chr1	1623360	1635721	12362	DUP	FALSE	19	0	0	0	2
chr1	1623360	1634508	11149	DUP	FALSE	17	0	0	0	2
chr1	1623360	1638357	14998	DUP	FALSE	27	0	0	0	2
chr1	1631312	1633710	2399	DUP	FALSE	1	0	0	0	0
chr1	1631312	1634508	3197	DUP	FALSE	1	0	0	0	0
chr1	1633710	1634508	799	DUP	FALSE	0	0	0	0	0
chr1	1634508	1635721	1214	DUP	FALSE	2	0	0	0	0
chr1	1635721	1638904	3184	DUP	FALSE	10	0	0	0	0
chr1	1635721	1656932	21212	DUP	FALSE	72	59	0	0	7
chr1	1636789	1678253	41465	DUP	TRUE	152	63	0	2	9
chr1	1636789	1638357	1569	DUP	FALSE	4	0	0	0	0
chr1	1638357	1638904	548	DUP	TRUE	2	0	0	0	0
chr1	1638904	1678253	39350	DUP	TRUE	146	63	0	2	9
chr1	1638904	1640838	1935	DUP	FALSE	5	0	0	0	1
chr1	1638904	1656151	17248	DUP	FALSE	61	59	0	0	7
chr1	1640539	1647577	7039	DUP	FALSE	17	1	0	0	1
chr1	1640539	1656151	15613	DUP	FALSE	57	59	0	0	6
chr1	1640539	1640838	300	DUP	FALSE	1	0	0	0	0
chr1	1640539	1653936	13398	DUP	FALSE	52	58	0	0	6
chr1	1640539	1654286	13748	DUP	FALSE	55	58	0	0	6
chr1	1647577	1653936	6360	DUP	FALSE	35	57	0	0	5
chr1	1647577	1648958	1382	DUP	FALSE	9	16	0	0	1
chr1	1648958	1653936	4979	DUP	FALSE	26	41	0	0	4
chr1	1653936	1654286	351	DUP	FALSE	3	0	0	0	0
chr1	1653936	1656151	2216	DUP	FALSE	5	1	0	0	0
chr1	1654286	1656151	1866	DUP	FALSE	2	1	0	0	0
chr1	1656151	1678253	22103	DUP	TRUE	85	4	0	2	2
chr1	1656151	1662211	6061	DUP	TRUE	20	3	0	1	1
chr1	1656932	1683770	26839	DUP	FALSE	95	7	0	2	3
chr1	1656932	1666205	9274	DUP	FALSE	37	3	0	1	1
chr1	1656932	1669943	13012	DUP	FALSE	54	4	0	1	1
chr1	1658926	1662211	3286	DUP	TRUE	12	3	0	0	0
chr1	1658926	1671041	12116	DUP	TRUE	49	4	0	0	0
chr1	1662211	1666205	3995	DUP	FALSE	18	0	0	0	0
chr1	1662211	1678253	16043	DUP	TRUE	65	1	0	1	1
chr1	1666205	1671041	4837	DUP	FALSE	19	1	0	0	0
chr1	1666205	1669943	3739	DUP	FALSE	17	1	0	0	0
chr1	1669152	1678253	9102	DUP	FALSE	35	1	0	1	1
chr1	1669152	1671041	1890	DUP	FALSE	7	1	0	0	0
chr1	1669943	1671041	1099	DUP	FALSE	2	0	0	0	0
chr1	1671041	1678253	7213	DUP	FALSE	28	0	0	1	1
chr1	1671041	1683770	12730	DUP	FALSE	39	3	0	1	2
chr1	1671041	1678880	7840	DUP	FALSE	29	0	0	1	1
chr1	1678253	1678880	628	DEL	TRUE	1	0	0	0	0
chr1	1678253	1680510	2258	DEL	TRUE	4	0	0	0	0
chr1	1678253	1683770	5518	DUP	FALSE	11	3	0	0	1
chr1	1680510	1683770	3261	DUP	FALSE	7	3	0	0	1
chr1	1918939	1925823	6885	DUP	TRUE	25	2	0	0	1
chr1	1984298	1987235	2938	DUP	TRUE	10	0	0	0	0
chr1	2162727	2164045	1319	DEL	TRUE	0	0	0	0	0
chr1	2401760	2404509	2750	DUP	TRUE	5	0	0	0	0
chr1	2450341	2452574	2234	DUP	TRUE	1	0	0	0	0
chr1	2561403	2567166	5764	DEL	TRUE	12	0	0	0	0
chr1	2797819	2799721	1903	DUP	TRUE	10	0	0	0	0
chr1	2996583	2998058	1476	DUP	TRUE	1	0	0	0	0
chr1	3670336	3671839	1504	DEL	TRUE	2	0	0	0	0
chr1	4120597	4131559	10963	DEL	TRUE	77	9	0	0	10
chr1	4283974	4288752	4779	DEL	TRUE	13	0	0	0	0
chr1	4559503	4565108	5606	DEL	TRUE	11	0	0	0	0
chr1	4818825	4820791	1967	DUP	TRUE	7	0	0	0	0
chr1	4933388	4938285	4898	DUP	TRUE	10	0	0	0	0
chr1	5302032	5304937	2906	DEL	TRUE	29	0	0	1	0
chr1	6437611	6447694	10084	DEL	TRUE	2	0	0	0	2
chr1	6615850	6636630	20781	DEL	TRUE	45	2	0	0	1
chr1	6761845	6764419	2575	DEL	TRUE	4	0	0	0	0
chr1	7114300	7120829	6530	DEL	TRUE	17	0	0	0	0
chr1	7411095	7412470	1376	DUP	TRUE	2	0	0	0	0
chr1	7569921	7571783	1863	DEL	TRUE	2	0	2	0	0
chr1	7644026	7648980	4955	DEL	TRUE	3	0	0	0	0
chr1	8181508	8192006	10499	DEL	TRUE	64	1	0	1	0
chr1	8203189	8212788	9600	DUP	TRUE	18	0	0	0	0
chr1	8238634	8244451	5818	DEL	TRUE	3	0	0	0	0
chr1	8246677	8251385	4709	DEL	TRUE	5	0	0	0	0
chr1	8359739	8364181	4443	DEL	TRUE	13	0	0	0	0
chr1	9845436	9863387	17952	DEL	TRUE	9	2	0	1	0
chr1	9927833	9930762	2930	DUP	TRUE	3	0	0	0	0
chr1	10067509	10076124	8616	DUP	TRUE	1	0	0	1	1
chr1	10254672	10261491	6820	DEL	TRUE	5	0	0	0	0
chr1	10272327	10278119	5793	DEL	TRUE	21	0	0	0	0
chr1	10282248	10326922	44675	DUP	TRUE	90	0	0	2	1
chr1	10369040	10375030	5991	DEL	TRUE	7	0	0	0	0
chr1	10369040	10379893	10854	DEL	TRUE	14	0	0	0	0
chr1	10630864	10650632	19769	DEL	TRUE	61	0	0	0	1
chr1	11654793	11668348	13556	DEL	TRUE	52	0	0	0	0
chr1	11984701	11994288	9588	DUP	FALSE	3	0	0	0	1
chr1	11988161	11989872	1712	DUP	FALSE	1	0	0	0	0
chr1	11988161	11994288	6128	DEL	TRUE	1	0	0	0	1
chr1	12128306	12136933	8628	DEL	TRUE	16	0	0	0	0
chr1	12741617	12748553	6937	DEL	TRUE	16	0	0	0	0
chr1	12839911	12868020	28110	DUP	FALSE	72	45	0	0	5
chr1	12839911	12856173	16263	DUP	FALSE	45	45	0	0	5
chr1	12839911	12867720	27810	DUP	FALSE	71	45	0	0	5
chr1	12856173	12867220	11048	DUP	FALSE	26	0	0	0	0
chr1	12856173	12867520	11348	DUP	FALSE	26	0	0	0	0
chr1	12856173	12908735	52563	DUP	FALSE	140	117	0	2	11
chr1	12867220	12867520	301	DUP	FALSE	0	0	0	0	0
chr1	12868364	12997222	128859	DUP	FALSE	223	277	0	5	21
chr1	12869209	12870820	1612	DUP	FALSE	2	0	0	0	0
chr1	12869209	12872509	3301	DUP	FALSE	8	0	0	0	0
chr1	12869209	13036908	167700	DUP	FALSE	292	309	0	5	33
chr1	12870820	12871354	535	DUP	FALSE	2	0	0	0	0
chr1	12871487	12997222	125736	DUP	FALSE	218	277	0	5	21
chr1	12871620	12961622	90003	DUP	FALSE	179	251	0	3	17
chr1	12871620	12913955	42336	DUP	FALSE	110	122	0	2	11
chr1	12871620	12984206	112587	DUP	FALSE	200	263	0	5	18
chr1	12872509	12993602	121094	DUP	FALSE	207	277	0	5	21
chr1	12872509	12913955	41447	DUP	FALSE	106	122	0	2	11
chr1	12908735	12913955	5221	DUP	FALSE	4	5	0	0	0
chr1	12908735	12961622	52888	DUP	FALSE	73	134	0	1	6
chr1	12913955	13014268	100314	DUP	FALSE	150	186	0	3	16
chr1	12913955	12997735	83781	DUP	FALSE	110	155	0	3	10
chr1	12913955	13036908	122954	DUP	FALSE	178	187	0	3	22
chr1	12913955	12993602	79648	DUP	FALSE	101	155	0	3	10
chr1	12913955	12961622	47668	DUP	FALSE	69	129	0	1	6
chr1	12961622	13036908	75287	DUP	FALSE	109	58	0	2	16
chr1	12961622	12984206	22585	DUP	FALSE	21	12	0	2	1
chr1	12961622	12993602	31981	DUP	FALSE	32	26	0	2	4
chr1	12980576	12981602	1027	DUP	FALSE	0	1	0	1	0
chr1	13013868	13014268	401	DUP	FALSE	1	0	0	0	0
chr1	13014268	13036908	22641	DUP	FALSE	28	1	0	0	6
chr1	13015827	13036201	20375	DUP	FALSE	22	1	0	0	5
chr1	13015827	13035494	19668	DUP	FALSE	22	1	0	0	5
chr1	13015827	13050506	34680	DUP	FALSE	91	1	0	0	9
chr1	13015827	13036908	21082	DUP	FALSE	28	1	0	0	6
chr1	13037607	13052907	15301	DUP	FALSE	81	0	0	0	6
chr1	13037607	13050506	12900	DUP	FALSE	62	0	0	0	3
chr1	13037607	13051706	14100	DUP	FALSE	71	0	0	0	3
chr1	13050506	13052907	2402	DUP	FALSE	19	0	0	0	3
chr1	13103107	13142659	39553	DUP	FALSE	58	14	0	1	10
chr1	13103107	13151389	48283	DUP	FALSE	76	16	0	1	16
chr1	13103107	13126055	22949	DUP	FALSE	44	9	0	1	1
chr1	13103107	13104942	1836	DUP	FALSE	3	0	0	0	0
chr1	13104024	13126055	22032	DUP	FALSE	44	9	0	1	1
chr1	13104942	13142659	37718	DUP	FALSE	55	14	0	1	10
chr1	13104942	13126055	21114	DUP	FALSE	41	9	0	1	1
chr1	13104942	13162055	57114	DUP	FALSE	77	16	0	1	17
chr1	13104942	13151389	46448	DUP	FALSE	73	16	0	1	16
chr1	13126055	13151389	25335	DUP	FALSE	32	7	0	0	15
chr1	13126055	13142659	16605	DUP	FALSE	14	5	0	0	9
chr1	13142659	13172152	29494	DUP	FALSE	26	2	0	0	7
chr1	13142659	13178346	35688	DUP	FALSE	36	25	0	0	11
chr1	13142659	13151389	8731	DUP	FALSE	18	2	0	0	6
chr1	13157809	13162055	4247	DUP	FALSE	1	0	0	0	0
chr1	13158982	13162055	3074	DUP	FALSE	0	0	0	0	0
chr1	13162055	13178346	16292	DUP	FALSE	14	23	0	0	4
chr1	13162806	13169263	6458	DUP	FALSE	2	0	0	0	0
chr1	13162806	13178346	15541	DUP	FALSE	14	23	0	0	4
chr1	13172152	13176292	4141	DUP	FALSE	5	21	0	0	2
chr1	13172152	13178346	6195	DUP	FALSE	10	23	0	0	4
chr1	13172152	13191186	19035	DUP	FALSE	32	225	0	1	9
chr1	13176292	13178346	2055	DUP	FALSE	5	2	0	0	2
chr1	13191186	13213912	22727	DUP	FALSE	16	0	0	0	0
chr1	13191186	13210833	19648	DUP	FALSE	11	0	0	0	0
chr1	13191186	13199189	8004	DUP	FALSE	2	0	0	0	0
chr1	13191186	13202850	11665	DUP	FALSE	7	0	0	0	0
chr1	13192569	13199189	6621	DUP	FALSE	1	0	0	0	0
chr1	13192569	13202850	10282	DUP	FALSE	6	0	0	0	0
chr1	13200347	13202850	2504	DUP	FALSE	3	0	0	0	0
chr1	13203447	13210833	7387	DUP	FALSE	4	0	0	0	0
chr1	13203447	13213912	10466	DUP	FALSE	9	0	0	0	0
chr1	13210494	13213912	3419	DUP	FALSE	5	0	0	0	0
chr1	13210833	13219557	8725	DUP	FALSE	20	4	0	1	3
chr1	13210833	13213912	3080	DUP	FALSE	5	0	0	0	0
chr1	13327525	13372997	45473	DUP	FALSE	79	4	0	1	7
chr1	13327525	13374627	47103	DUP	FALSE	83	4	0	1	7
chr1	13327525	13372903	45379	DUP	FALSE	78	4	0	1	7
chr1	13327525	13329795	2271	DUP	FALSE	21	0	0	0	1
chr1	13329795	13374627	44833	DUP	FALSE	62	4	0	1	6
chr1	13329795	13372903	43109	DUP	FALSE	57	4	0	1	6
chr1	13351443	13379197	27755	DUP	FALSE	57	4	0	0	4
chr1	13372903	13373092	190	DUP	FALSE	1	0	0	0	0
chr1	13373092	13387933	14842	DUP	FALSE	30	1	0	0	1
chr1	13373859	13382914	9056	DUP	FALSE	19	1	0	0	1
chr1	13374286	13382914	8629	DUP	FALSE	19	1	0	0	1
chr1	13374627	13375480	854	DUP	FALSE	2	0	0	0	0
chr1	13375480	13382914	7435	DUP	FALSE	15	1	0	0	1
chr1	13375480	13378638	3159	DUP	FALSE	12	0	0	0	0
chr1	13380059	13428400	48342	DUP	FALSE	45	10	0	0	2
chr1	13380892	13496414	115523	DUP	FALSE	127	25	0	0	2
chr1	13496414	13497031	618	DUP	FALSE	3	0	0	0	0
chr1	13497031	13499353	2323	DUP	FALSE	9	0	0	0	0
chr1	13503895	13504199	305	DUP	TRUE	1	0	0	0	0
chr1	13504199	13508240	4042	DUP	FALSE	7	0	0	0	0
chr1	13512627	13526732	14106	DUP	FALSE	14	0	1	1	1
chr1	13674927	13695957	21031	DUP	FALSE	17	10	0	1	0
chr1	13674927	13678556	3630	DUP	FALSE	4	4	0	1	0
chr1	13674927	13717211	42285	DUP	FALSE	54	12	0	1	2
chr1	13678556	13696357	17802	DUP	FALSE	14	6	0	0	0
chr1	13678556	13697166	18611	DUP	FALSE	14	6	0	0	0
chr1	13678556	13716300	37745	DUP	FALSE	41	8	0	0	2
chr1	13678556	13695957	17402	DUP	FALSE	13	6	0	0	0
chr1	13688411	13716755	28345	DUP	FALSE	38	5	0	0	2
chr1	13695957	13717211	21255	DUP	FALSE	37	2	0	0	2
chr1	13696157	13720148	23992	DUP	FALSE	49	2	0	0	2
chr1	13696157	13697716	1560	DUP	FALSE	1	0	0	0	0
chr1	13697112	13718679	21568	DUP	FALSE	45	2	0	0	2
chr1	13697112	13716300	19189	DUP	FALSE	27	2	0	0	2
chr1	13698267	13718176	19910	DUP	FALSE	42	1	0	0	2
chr1	13698267	13717693	19427	DUP	FALSE	38	1	0	0	2
chr1	13698267	13717211	18945	DUP	FALSE	36	1	0	0	2
chr1	13698267	13716300	18034	DUP	FALSE	27	1	0	0	2
chr1	13716300	13717211	912	DUP	FALSE	9	0	0	0	0
chr1	13716300	13718176	1877	DUP	FALSE	15	0	0	0	0
chr1	13717211	13718176	966	DUP	FALSE	6	0	0	0	0
chr1	13718176	13720148	1973	DUP	FALSE	6	0	0	0	0
chr1	13719636	13720148	513	DUP	FALSE	1	0	0	0	0
chr1	13725296	13733660	8365	DUP	FALSE	19	0	0	0	0
chr1	13772276	13778250	5975	DEL	TRUE	6	0	0	0	0
chr1	14436060	14439381	3322	DEL	TRUE	8	0	0	0	0
chr1	14948818	14985994	37177	DEL	TRUE	77	1	0	1	0
chr1	15274454	15280582	6129	DEL	TRUE	11	0	0	0	0
chr1	15516447	15522356	5910	DUP	TRUE	29	0	0	0	1
chr1	16012225	16081795	69571	DUP	TRUE	67	1	0	2	2
chr1	16148564	16154830	6267	DEL	TRUE	21	0	0	0	3
chr1	16181965	16195961	13997	DEL	TRUE	31	0	0	0	0
chr1	16346421	16351275	4855	DUP	TRUE	16	0	0	1	1
chr1	16347077	16351225	4149	DUP	TRUE	11	0	0	1	1
chr1	16347077	16348623	1547	DUP	FALSE	5	0	0	1	1
chr1	16351225	16351275	51	DUP	TRUE	1	0	0	0	0
chr1	16353383	16359919	6537	DUP	TRUE	40	0	0	0	0
chr1	16358242	16359056	815	DUP	TRUE	6	0	0	0	0
chr1	16358242	16359919	1678	DUP	TRUE	13	0	0	0	0
chr1	16360345	16369106	8762	DUP	FALSE	60	0	1	1	2
chr1	16360345	16363787	3443	DUP	FALSE	16	0	0	0	2
chr1	16360345	16390077	29733	DUP	FALSE	247	0	1	1	8
chr1	16363787	16365360	1574	DUP	FALSE	13	0	0	0	0
chr1	16365360	16384939	19580	DUP	TRUE	177	0	1	1	3
chr1	16365360	16386225	20866	DUP	FALSE	187	0	1	1	5
chr1	16365360	16371040	5681	DUP	TRUE	52	0	1	1	0
chr1	16369106	16369643	538	DUP	FALSE	6	0	0	0	0
chr1	16369106	16371040	1935	DUP	FALSE	21	0	0	0	0
chr1	16371040	16379962	8923	DUP	FALSE	69	0	0	0	0
chr1	16371040	16372116	1077	DUP	FALSE	7	0	0	0	0
chr1	16371359	16384517	13159	DUP	TRUE	117	0	0	0	2
chr1	16371359	16372116	758	DUP	TRUE	6	0	0	0	0
chr1	16375991	16379962	3972	DUP	TRUE	33	0	0	0	0
chr1	16382753	16386225	3473	DUP	FALSE	38	0	0	0	5
chr1	16383254	16386025	2772	DUP	FALSE	34	0	0	0	5
chr1	16383680	16384517	838	DUP	FALSE	9	0	0	0	1
chr1	16383680	16384939	1260	DUP	FALSE	16	0	0	0	2
chr1	16386225	16388415	2191	DEL	TRUE	14	0	0	0	1
chr1	16533171	16535345	2175	DUP	TRUE	3	0	0	0	0
chr1	16741891	16748702	6812	DEL	TRUE	13	0	0	0	0
chr1	16748702	16757871	9170	DEL	TRUE	9	1	0	0	2
chr1	16797133	16817354	20222	DUP	FALSE	36	0	0	1	0
chr1	16849229	17051972	202744	DUP	FALSE	480	516	0	37	246
chr1	16850186	16854139	3954	DUP	FALSE	3	0	0	0	1
chr1	16851144	17124790	273647	DUP	FALSE	597	660	0	41	301
chr1	16851144	17009246	158103	DUP	FALSE	358	455	0	37	137
chr1	16851144	16854139	2996	DUP	FALSE	3	0	0	0	0
chr1	16851144	17013005	161862	DUP	FALSE	368	456	0	37	139
chr1	16851684	17087806	236123	DUP	FALSE	528	644	0	40	286
chr1	16854139	17051972	197834	DUP	FALSE	475	516	0	37	244
chr1	16854139	17087806	233668	DUP	FALSE	526	644	0	40	286
chr1	17009246	17124790	115545	DUP	FALSE	239	205	0	4	164
chr1	17009246	17051972	42727	DUP	FALSE	120	61	0	0	107
chr1	17009246	17013005	3760	DUP	FALSE	10	1	0	0	2
chr1	17013005	17051972	38968	DUP	FALSE	110	60	0	0	105
chr1	17013005	17087806	74802	DUP	FALSE	161	188	0	3	147
chr1	17051972	17124790	72819	DUP	FALSE	119	144	0	4	57
chr1	17051972	17087806	35835	DUP	FALSE	51	128	0	3	42
chr1	17087806	17124790	36985	DUP	FALSE	68	16	0	1	15
chr1	17176853	17232654	55802	DUP	FALSE	204	274	0	5	43
chr1	17176853	17255737	78885	DUP	FALSE	291	362	0	5	66
chr1	17176853	17205794	28942	DUP	FALSE	53	170	0	5	21
chr1	17176853	17216388	39536	DUP	FALSE	90	173	0	5	22
chr1	17176853	17281703	104851	DUP	FALSE	378	362	0	5	89
chr1	17205794	17216388	10595	DUP	FALSE	37	3	0	0	1
chr1	17216388	17231379	14992	DUP	FALSE	98	85	0	0	21
chr1	17231379	17281703	50325	DUP	FALSE	190	104	0	0	46
chr1	17232654	17255737	23084	DUP	FALSE	87	88	0	0	23
chr1	17232654	17281703	49050	DUP	FALSE	174	88	0	0	46
chr1	17255737	17281703	25967	DUP	FALSE	87	0	0	0	23
chr1	17359812	17371424	11613	DEL	TRUE	21	0	0	0	0
chr1	17593888	17624343	30456	DUP	TRUE	114	0	0	0	0
chr1	17641354	17645690	4337	DEL	TRUE	14	0	0	0	0
chr1	17748824	17750224	1401	DUP	TRUE	2	0	0	0	0
chr1	17997124	18004325	7202	DEL	TRUE	3	0	0	1	0
chr1	18540840	18551912	11073	DEL	TRUE	19	0	0	1	0
chr1	19175972	19179071	3100	DUP	TRUE	13	0	0	0	0
chr1	19196372	19199227	2856	DUP	TRUE	14	0	0	0	0
chr1	19538647	19594109	55463	DUP	TRUE	99	1	0	1	0
chr1	19594109	19610722	16614	DUP	FALSE	26	0	0	1	1
chr1	19595438	19614254	18817	DUP	TRUE	37	0	0	1	1
chr1	20495490	20497976	2487	DUP	FALSE	2	0	0	0	0
chr1	20498176	20500965	2790	DEL	TRUE	10	0	0	1	0
chr1	20887386	20927877	40492	DUP	TRUE	179	2	0	0	0
chr1	20991317	21005334	14018	DEL	TRUE	33	0	0	0	1
chr1	21810224	21818578	8355	DUP	FALSE	25	0	1	0	0
chr1	21822248	21830360	8113	DEL	TRUE	17	0	0	0	0
chr1	22271948	22277403	5456	DEL	TRUE	18	0	0	0	0
chr1	22499593	22510981	11389	DEL	TRUE	41	0	0	1	0
chr1	22885848	22889082	3235	DEL	TRUE	2	0	0	0	0
chr1	23555954	23570095	14142	DEL	TRUE	30	0	0	1	1
chr1	23735488	23739341	3854	DEL	TRUE	1	0	0	0	0
chr1	23816906	23833086	16181	DEL	TRUE	38	0	0	0	5
chr1	23977746	24000438	22693	DEL	TRUE	53	0	0	0	0
chr1	24519544	24525820	6277	DEL	TRUE	23	0	0	0	0
chr1	24802194	24810595	8402	DEL	TRUE	6	0	0	0	2
chr1	24894803	24902729	7927	DEL	TRUE	45	0	0	0	0
chr1	25177114	25185044	7931	DEL	TRUE	29	0	0	0	1
chr1	25199254	25212982	13729	DEL	TRUE	9	0	0	1	0
chr1	25585184	25665287	80104	DUP	FALSE	71	2	3	3	1
chr1	25619970	25621068	1099	DUP	FALSE	0	0	0	0	0
chr1	25666778	25688261	21484	DUP	TRUE	22	1	0	0	1
chr1	26014974	26019197	4224	DUP	TRUE	1	0	0	0	0
chr1	26456053	26464186	8134	DEL	TRUE	8	1	0	0	0
chr1	26701639	26706790	5152	DEL	TRUE	16	0	0	0	0
chr1	27121638	27123329	1692	DEL	TRUE	1	0	0	0	0
chr1	27165579	27188428	22850	DUP	TRUE	10	0	0	0	0
chr1	27179549	27181253	1705	DUP	TRUE	1	0	0	0	0
chr1	27696407	27705645	9239	DUP	TRUE	9	0	0	0	0
chr1	27973654	27983235	9582	DUP	TRUE	7	0	0	0	0
chr1	28241379	28249932	8554	DEL	TRUE	43	1	0	0	0
chr1	28541148	28548130	6983	DUP	TRUE	15	0	0	0	1
chr1	28549680	28564546	14867	DUP	TRUE	33	1	0	0	0
chr1	28609518	28623281	13764	DUP	TRUE	5	1	0	0	0
chr1	29303724	29309108	5385	DEL	TRUE	9	0	0	0	0
chr1	29346435	29352627	6193	DEL	TRUE	3	0	0	0	0
chr1	29469579	29474646	5068	DEL	TRUE	11	0	0	0	1
chr1	30200850	30204734	3885	DEL	TRUE	8	0	0	0	0
chr1	30478277	30498152	19876	DEL	TRUE	76	0	0	0	0
chr1	30775837	30784436	8600	DEL	TRUE	9	0	0	0	0
chr1	31135312	31173877	38566	DUP	TRUE	97	0	0	1	0
chr1	31169392	31173141	3750	DEL	TRUE	12	0	0	0	0
chr1	31169392	31171765	2374	DEL	TRUE	8	0	0	0	0
chr1	31176225	31278517	102293	DUP	TRUE	200	5	0	1	3
chr1	31574285	31581067	6783	DEL	TRUE	2	0	0	0	2
chr1	31675183	31680899	5717	DUP	TRUE	16	0	0	0	0
chr1	31717588	31724762	7175	DEL	TRUE	16	0	0	0	1
chr1	31999475	32006444	6970	DEL	TRUE	19	0	0	0	0
chr1	33191170	33199640	8471	DUP	TRUE	17	0	0	0	0
chr1	33417363	33422384	5022	DEL	TRUE	14	0	0	0	0
chr1	33785343	33788496	3154	DEL	TRUE	3	0	0	0	0
chr1	34135003	34144151	9149	DEL	TRUE	12	0	0	0	0
chr1	35096877	35112437	15561	DEL	TRUE	29	0	23	1	0
chr1	35112437	35123880	11444	DEL	TRUE	36	0	0	0	0
chr1	35342925	35350683	7759	DEL	TRUE	6	0	0	0	0
chr1	35902535	35905668	3134	DUP	TRUE	0	0	0	0	0
chr1	36085697	36088519	2823	DUP	TRUE	3	0	0	0	0
chr1	36420400	36430713	10314	DUP	TRUE	1	0	0	0	0
chr1	36677413	36690569	13157	DUP	TRUE	13	0	0	0	1
chr1	37035730	37039850	4121	DEL	TRUE	5	0	0	0	1
chr1	37520649	37524042	3394	DEL	TRUE	13	0	0	0	0
chr1	37706441	37712551	6111	DEL	TRUE	12	0	0	0	0
chr1	38602043	38605549	3507	DEL	TRUE	5	0	0	0	0
chr1	38642060	38645785	3726	DEL	TRUE	14	0	0	0	0
chr1	39083882	39087257	3376	DEL	TRUE	6	0	0	0	0
chr1	39134250	39181149	46900	DEL	TRUE	109	0	0	0	0
chr1	39161060	39165208	4149	DUP	TRUE	7	0	0	0	0
chr1	39397321	39406712	9392	DEL	TRUE	33	0	0	0	0
chr1	39510932	39513510	2579	DUP	TRUE	5	0	0	0	0
chr1	40574905	40587604	12700	DEL	TRUE	24	0	0	0	1
chr1	40685218	40688027	2810	DEL	TRUE	4	0	0	0	0
chr1	40920596	40927987	7392	DEL	TRUE	19	0	0	0	0
chr1	40962865	40971169	8305	DEL	TRUE	12	0	0	0	0
chr1	40966537	40970969	4433	DEL	TRUE	3	0	0	0	0
chr1	40976209	40995105	18897	DEL	TRUE	32	1	0	0	0
chr1	41021366	41025572	4207	DEL	TRUE	24	0	0	0	0
chr1	41021366	41030441	9076	DEL	TRUE	37	0	0	0	0
chr1	41345874	41381962	36089	DUP	TRUE	76	1	0	1	1
chr1	41669555	41696787	27233	DEL	TRUE	39	0	0	0	1
chr1	41808033	41813355	5323	DEL	TRUE	18	0	0	0	0
chr1	42071479	42073999	2521	DEL	TRUE	5	0	0	0	0
chr1	42143812	42145131	1320	DEL	TRUE	1	0	0	0	0
chr1	42647856	42653206	5351	DEL	TRUE	4	0	0	0	0
chr1	42930613	42937494	6882	DEL	TRUE	3	0	0	0	0
chr1	43195867	43199764	3898	DEL	TRUE	4	0	0	0	0
chr1	43451878	43459597	7720	DUP	TRUE	25	0	0	0	2
chr1	43459597	43464833	5237	DEL	TRUE	8	0	0	0	0
chr1	43570162	43595044	24883	DEL	TRUE	21	0	0	0	0
chr1	43693052	43695884	2833	DEL	TRUE	3	0	0	0	0
chr1	44091249	44114701	23453	DUP	TRUE	65	0	0	0	2
chr1	44879096	44884712	5617	DUP	TRUE	13	0	0	0	0
chr1	45331747	45340378	8632	DEL	TRUE	19	0	0	0	0
chr1	45627248	45644255	17008	DEL	TRUE	33	0	0	0	0
chr1	46025031	46030115	5085	DEL	TRUE	6	0	0	0	1
chr1	46574277	46586981	12705	DEL	TRUE	23	0	0	0	0
chr1	47080609	47083216	2608	DUP	TRUE	5	0	0	0	1
chr1	47412701	47427062	14362	DEL	TRUE	30	0	0	0	0
chr1	47518311	47533083	14773	DEL	TRUE	33	0	0	0	0
chr1	47840502	47843347	2846	DUP	TRUE	6	0	0	0	0
chr1	47840502	47845985	5484	DUP	TRUE	9	0	0	0	0
chr1	47943977	47948754	4778	DUP	TRUE	18	0	0	0	0
chr1	48134026	48411055	277030	DUP	TRUE	382	3	0	1	3
chr1	48430109	48431835	1727	DUP	TRUE	4	0	0	0	0
chr1	48720442	48724450	4009	DEL	TRUE	11	0	0	1	0
chr1	48991845	48996137	4293	DEL	TRUE	6	0	0	0	0
chr1	49905074	49998984	93911	DEL	TRUE	72	0	0	3	3
chr1	50277177	50303673	26497	DEL	TRUE	22	0	0	0	0
chr1	51127803	51132710	4908	DEL	TRUE	5	0	0	0	0
chr1	51191996	51202977	10982	DUP	TRUE	15	0	0	0	0
chr1	52144721	52151689	6969	DEL	TRUE	0	0	0	0	0
chr1	53168038	53174913	6876	DUP	TRUE	19	0	0	0	0
chr1	53593088	53595872	2785	DEL	TRUE	10	0	0	0	0
chr1	53897994	53905803	7810	DEL	TRUE	18	0	0	1	1
chr1	53999167	54002886	3720	DEL	TRUE	5	0	0	0	0
chr1	54239415	54251055	11641	DEL	TRUE	16	0	0	0	0
chr1	54442199	54457154	14956	DEL	TRUE	6	0	0	0	0
chr1	54735204	54736595	1392	DEL	TRUE	2	0	0	0	0
chr1	55092034	55105927	13894	DEL	TRUE	12	0	0	0	0
chr1	55301805	55307967	6163	DEL	TRUE	34	0	0	0	0
chr1	55487634	55509409	21776	DEL	TRUE	88	0	0	0	0
chr1	55850496	55862900	12405	DEL	TRUE	20	0	0	0	0
chr1	56253121	56297700	44580	DUP	TRUE	63	8	0	0	2
chr1	56857153	56859429	2277	DEL	TRUE	3	0	0	0	0
chr1	57407996	57417973	9978	DEL	TRUE	22	0	0	0	0
chr1	57565569	57568034	2466	DEL	TRUE	9	0	0	0	0
chr1	58566641	58582780	16140	DEL	TRUE	24	0	0	0	1
chr1	58717018	58742309	25292	DUP	TRUE	70	0	0	0	1
chr1	58766879	58776433	9555	DEL	TRUE	10	0	0	1	0
chr1	59716003	59733021	17019	DUP	TRUE	63	0	0	0	0
chr1	60046951	60058835	11885	DEL	TRUE	77	0	0	1	0
chr1	62080535	62084076	3542	DEL	TRUE	16	0	0	0	1
chr1	62112538	62120128	7591	DEL	TRUE	13	0	9	0	0
chr1	62620869	62625863	4995	DEL	TRUE	8	0	0	0	0
chr1	62642084	62656768	14685	DEL	TRUE	26	1	0	0	1
chr1	63612258	63616516	4259	DEL	TRUE	5	0	0	0	0
chr1	63676625	63684921	8297	DEL	TRUE	20	0	0	0	0
chr1	63697005	63708892	11888	DEL	TRUE	11	0	0	1	1
chr1	63846576	63858507	11932	DEL	TRUE	11	0	0	0	0
chr1	64387780	64393798	6019	DEL	TRUE	12	0	0	0	0
chr1	64446384	64448394	2011	DEL	TRUE	2	0	0	0	0
chr1	64838120	64848587	10468	DEL	TRUE	56	0	0	0	0
chr1	64841514	64848587	7074	DEL	TRUE	32	0	0	0	0
chr1	65800521	65818949	18429	DEL	TRUE	55	0	0	0	0
chr1	65846107	65856327	10221	DUP	TRUE	22	2	0	0	0
chr1	66039193	66044566	5374	DEL	TRUE	3	0	0	1	0
chr1	67451780	67454196	2417	DUP	TRUE	5	0	0	0	0
chr1	67467877	67469937	2061	DUP	TRUE	1	0	0	0	0
chr1	67759876	67768117	8242	DEL	TRUE	11	0	0	0	1
chr1	67863303	67873563	10261	DEL	TRUE	12	0	0	0	2
chr1	68003764	68010924	7161	DEL	TRUE	13	0	0	0	0
chr1	69801091	69807577	6487	DUP	TRUE	21	0	0	0	0
chr1	69992713	70003981	11269	DEL	TRUE	20	0	0	0	0
chr1	70647470	70650415	2946	DEL	TRUE	4	0	0	0	0
chr1	71243725	71251186	7462	DEL	TRUE	17	1	0	0	0
chr1	71304652	71315241	10590	DEL	TRUE	14	0	0	0	0
chr1	71486934	71491501	4568	DEL	TRUE	41	0	0	0	0
chr1	71829685	71832031	2347	DEL	TRUE	4	0	0	0	0
chr1	71845583	71940787	95205	DUP	TRUE	119	0	0	2	3
chr1	72363899	72365746	1848	DEL	TRUE	7	0	0	0	0
chr1	72449155	72451536	2382	DEL	TRUE	0	0	0	0	0
chr1	72552305	72598615	46311	DUP	TRUE	76	0	0	3	1
chr1	72754413	72765287	10875	DEL	TRUE	33	0	0	1	0
chr1	72767498	72812601	45104	DEL	TRUE	5	0	0	0	0
chr1	73351167	73362252	11086	DEL	TRUE	19	0	0	0	0
chr1	73435661	73440068	4408	DEL	TRUE	5	0	0	1	0
chr1	73445078	73461258	16181	DUP	TRUE	39	1	0	2	0
chr1	73467860	73476456	8597	DEL	TRUE	7	0	0	0	0
chr1	73627277	73783032	155756	DEL	TRUE	357	0	0	6	1
chr1	73680541	73685838	5298	DUP	TRUE	3	0	0	0	0
chr1	73689259	73712855	23597	DUP	TRUE	24	0	0	0	0
chr1	73766261	73775905	9645	DEL	TRUE	26	0	0	0	0
chr1	74209025	74214736	5712	DUP	TRUE	7	0	0	0	1
chr1	74346654	74348729	2076	DEL	TRUE	4	0	0	0	0
chr1	74348729	74365507	16779	DEL	TRUE	25	0	0	0	0
chr1	74648583	74664195	15613	DUP	TRUE	18	0	0	0	0
chr1	75171910	75175724	3815	DUP	TRUE	12	0	0	0	0
chr1	75271285	75288439	17155	DEL	TRUE	40	0	0	0	0
chr1	75718026	75731686	13661	DEL	TRUE	21	0	0	0	0
chr1	76900235	76904782	4548	DEL	TRUE	8	0	0	0	0
chr1	76946239	77008181	61943	DEL	TRUE	146	0	0	1	1
chr1	76991722	76992322	601	DUP	TRUE	5	0	0	0	0
chr1	77010915	77023626	12712	DEL	TRUE	8	0	0	0	0
chr1	77101817	77118339	16523	DEL	TRUE	23	0	0	0	0
chr1	77160443	77165719	5277	DEL	TRUE	22	0	0	0	0
chr1	77253707	77260771	7065	DEL	TRUE	23	0	0	0	0
chr1	77339860	77357683	17824	DEL	TRUE	20	0	0	0	0
chr1	77607235	77613402	6168	DEL	TRUE	7	0	0	0	0
chr1	77988886	77993174	4289	DEL	TRUE	9	0	0	0	0
chr1	78648623	78666578	17956	DEL	TRUE	43	0	2	0	0
chr1	78884285	78890341	6057	DEL	TRUE	13	0	0	0	0
chr1	79393265	79395899	2635	DEL	TRUE	9	0	0	0	0
chr1	79676460	79679273	2814	DEL	TRUE	11	0	0	1	0
chr1	79824993	79886429	61437	DEL	TRUE	135	0	0	4	0
chr1	79866201	79872900	6700	DEL	TRUE	12	0	0	0	0
chr1	79927555	79934155	6601	DEL	TRUE	10	0	0	0	0
chr1	80219477	80225682	6206	DEL	TRUE	22	0	0	0	0
chr1	80257793	80274792	17000	DEL	TRUE	26	0	0	0	0
chr1	80340325	80361080	20756	DEL	TRUE	60	0	0	2	0
chr1	82464983	82473368	8386	DUP	TRUE	13	0	0	1	1
chr1	82803536	82807282	3747	DUP	TRUE	13	0	0	0	0
chr1	82901636	82904205	2570	DUP	TRUE	3	0	0	0	0
chr1	83302149	83304752	2604	DEL	TRUE	5	0	0	0	0
chr1	83597522	83700837	103316	DUP	FALSE	272	0	0	2	5
chr1	83630686	83654159	23474	DUP	TRUE	125	0	0	0	2
chr1	83630686	83704575	73890	DUP	TRUE	204	0	0	2	5
chr1	83704575	83705609	1035	DUP	FALSE	1	0	0	0	0
chr1	83705609	83736109	30501	DUP	TRUE	72	0	0	0	4
chr1	83705609	83762460	56852	DUP	FALSE	123	1	0	3	4
chr1	83804548	83809766	5219	DUP	FALSE	14	0	0	0	0
chr1	83804548	83827151	22604	DUP	FALSE	80	6	0	0	0
chr1	83830346	83835231	4886	DUP	FALSE	16	0	0	0	0
chr1	83830346	83830786	441	DUP	FALSE	3	0	0	0	0
chr1	83948984	83952729	3746	DUP	FALSE	3	0	0	0	0
chr1	83991501	83994016	2516	DEL	TRUE	5	0	0	0	0
chr1	85223808	85225295	1488	DUP	TRUE	5	0	0	0	0
chr1	85537932	85544237	6306	DEL	TRUE	31	0	0	0	0
chr1	85972347	86007029	34683	DUP	FALSE	44	234	0	0	8
chr1	86289955	86302648	12694	DUP	FALSE	38	0	0	1	1
chr1	86371531	86465679	94149	DUP	TRUE	210	1	0	2	1
chr1	86400301	86404997	4697	DEL	TRUE	8	0	0	0	0
chr1	86408119	86517277	109159	DUP	TRUE	336	1	0	2	0
chr1	87085136	87102550	17415	DEL	TRUE	10	0	0	0	0
chr1	87586902	87589230	2329	DUP	TRUE	5	0	0	0	0
chr1	87667864	87669816	1953	DUP	TRUE	2	0	0	0	0
chr1	88944355	88950556	6202	DEL	TRUE	11	0	0	0	0
chr1	89093135	89095484	2350	DEL	TRUE	2	0	0	0	0
chr1	89261170	89314161	52992	DUP	TRUE	146	0	0	0	0
chr1	89475168	89477776	2609	DUP	TRUE	3	0	0	0	0
chr1	89585821	89594851	9031	DEL	TRUE	14	0	0	0	0
chr1	89798741	89815960	17220	DEL	TRUE	34	0	0	0	0
chr1	90021268	90023609	2342	DEL	TRUE	4	0	0	0	0
chr1	90113260	90117307	4048	DEL	TRUE	13	0	0	0	0
chr1	90167698	90174468	6771	DEL	TRUE	8	1	0	0	0
chr1	90293002	90295443	2442	DEL	TRUE	3	0	0	0	0
chr1	91666842	91700230	33389	DUP	TRUE	68	0	0	0	3
chr1	92252453	92255398	2946	DEL	TRUE	8	0	0	0	0
chr1	92451146	92453740	2595	DEL	TRUE	8	0	0	0	0
chr1	92576981	92605071	28091	DEL	TRUE	46	0	0	0	1
chr1	92578706	92581031	2326	DUP	TRUE	3	0	0	0	0
chr1	93201963	93207040	5078	DEL	TRUE	9	0	0	0	0
chr1	93408679	93422183	13505	DEL	TRUE	19	0	0	0	0
chr1	93831292	93847067	15776	DEL	TRUE	26	0	0	0	0
chr1	94287680	94291451	3772	DEL	TRUE	2	0	0	0	0
chr1	94649010	94651123	2114	DUP	TRUE	0	0	0	0	0
chr1	94671226	94674442	3217	DEL	TRUE	9	0	0	0	0
chr1	94986812	94992606	5795	DEL	TRUE	7	0	0	0	0
chr1	95126675	95155515	28841	DEL	TRUE	156	0	0	0	0
chr1	95515774	95527230	11457	DEL	TRUE	7	0	0	0	0
chr1	98147524	98149145	1622	DUP	TRUE	0	0	0	0	0
chr1	98193499	98195428	1930	DUP	TRUE	1	0	0	0	0
chr1	98859724	98860906	1183	DEL	TRUE	2	0	0	0	0
chr1	98891680	98914441	22762	DUP	TRUE	66	0	0	0	1
chr1	99402515	99410582	8068	DEL	TRUE	21	0	0	0	0
chr1	99719261	99725673	6413	DEL	TRUE	6	0	0	1	0
chr1	99890570	99893434	2865	DEL	TRUE	0	0	0	0	0
chr1	100301205	100307726	6522	DUP	TRUE	11	0	0	0	0
chr1	100517299	100523294	5996	DUP	TRUE	3	0	0	0	0
chr1	100536359	100540681	4323	DEL	TRUE	1	0	0	0	0
chr1	101231073	101232525	1453	DEL	TRUE	2	0	0	0	0
chr1	102084386	102090472	6087	DEL	TRUE	49	0	0	0	0
chr1	102096069	102099718	3650	DEL	TRUE	9	0	0	0	0
chr1	102141523	102143221	1699	DEL	TRUE	0	0	0	0	0
chr1	102395735	102403958	8224	DEL	TRUE	13	0	0	0	0
chr1	104095773	104129136	33364	DUP	FALSE	17	0	0	0	0
chr1	104104549	104129232	24684	DUP	FALSE	13	0	0	0	0
chr1	104104549	104112987	8439	DUP	TRUE	5	0	0	0	0
chr1	104112735	104117947	5213	DUP	FALSE	1	0	0	0	0
chr1	104112987	104122907	9921	DUP	FALSE	3	0	0	0	0
chr1	104122907	104129184	6278	DUP	TRUE	5	0	0	0	0
chr1	104136181	104160867	24687	DUP	FALSE	17	0	0	0	1
chr1	104136181	104309480	173300	DUP	FALSE	112	2	0	0	6
chr1	104136181	104144325	8145	DUP	FALSE	3	0	0	0	0
chr1	104144325	104160686	16362	DUP	FALSE	14	0	0	0	1
chr1	104144325	104309480	165156	DUP	FALSE	109	2	0	0	6
chr1	104144325	104161048	16724	DUP	FALSE	14	0	0	0	1
chr1	104160686	104161048	363	DUP	FALSE	0	0	0	0	0
chr1	104160867	104309480	148614	DUP	FALSE	95	2	0	0	5
chr1	104501574	104517764	16191	DEL	TRUE	30	0	0	1	0
chr1	104699359	104706389	7031	DUP	TRUE	1	0	0	0	0
chr1	104706389	104708414	2026	DEL	TRUE	1	0	0	0	0
chr1	104812047	104826829	14783	DEL	TRUE	44	0	0	0	0
chr1	105030686	105047759	17074	DEL	TRUE	32	0	0	2	0
chr1	105623073	105628146	5074	DEL	TRUE	8	0	0	0	0
chr1	105624814	105638380	13567	DEL	TRUE	23	0	0	0	0
chr1	105832372	105847567	15196	DEL	TRUE	44	0	0	0	0
chr1	106012173	106025243	13071	DEL	TRUE	41	0	0	0	0
chr1	106162399	106219146	56748	DEL	TRUE	95	0	0	0	1
chr1	106260438	106270759	10322	DUP	TRUE	8	0	0	0	0
chr1	106273245	106293928	20684	DUP	TRUE	16	1	0	0	0
chr1	106305191	106319326	14136	DEL	TRUE	26	0	0	0	0
chr1	106477872	106510264	32393	DUP	TRUE	5	0	0	0	1
chr1	106871448	106959848	88401	DEL	TRUE	192	1	0	0	2
chr1	106977487	106983521	6035	DEL	TRUE	4	0	0	1	1
chr1	107008962	107039028	30067	DUP	TRUE	15	0	0	1	0
chr1	107047472	107057703	10232	DEL	TRUE	16	0	0	0	0
chr1	107106440	107108664	2225	DUP	TRUE	5	0	0	0	0
chr1	107220547	107229221	8675	DEL	TRUE	15	0	0	1	0
chr1	107654008	107664176	10169	DEL	TRUE	10	0	1	0	0
chr1	107891259	107899854	8596	DEL	TRUE	3	0	0	0	0
chr1	108170862	108173352	2491	DEL	TRUE	4	0	0	0	0
chr1	108401521	108405757	4237	DEL	TRUE	3	0	1	0	0
chr1	108462814	108467125	4312	DEL	TRUE	2	0	0	0	1
chr1	108598008	108612622	14615	DEL	TRUE	39	0	0	0	0
chr1	108729310	108737787	8478	DEL	TRUE	18	0	0	0	0
chr1	108772235	108789505	17271	DUP	FALSE	11	1	0	0	2
chr1	108915500	109000373	84874	DUP	FALSE	74	5	0	1	1
chr1	108925245	108977112	51868	DUP	FALSE	42	0	0	1	0
chr1	108925943	109000373	74431	DUP	FALSE	67	3	0	1	1
chr1	108925943	108939138	13196	DUP	FALSE	9	0	0	0	0
chr1	108939138	108953492	14355	DUP	FALSE	26	0	0	0	0
chr1	108953492	109000873	47382	DUP	FALSE	32	3	0	1	1
chr1	108977112	109000373	23262	DUP	FALSE	25	3	0	0	1
chr1	109366868	109372210	5343	DEL	TRUE	25	0	0	0	0
chr1	109368679	109372210	3532	DEL	TRUE	15	0	0	0	0
chr1	109573089	109580939	7851	DEL	TRUE	9	0	0	0	0
chr1	110186756	110194030	7275	DEL	TRUE	10	0	0	0	0
chr1	110203009	110204989	1981	DUP	FALSE	4	0	0	0	0
chr1	110215300	110257943	42644	DUP	TRUE	71	5	0	0	1
chr1	110353526	110358126	4601	DEL	TRUE	11	0	0	0	0
chr1	111030837	111032521	1685	DEL	TRUE	7	0	0	0	0
chr1	111274290	111280397	6108	DEL	TRUE	8	0	0	0	0
chr1	111291265	111293290	2026	DEL	TRUE	4	0	0	0	0
chr1	111312561	111316759	4199	DEL	TRUE	26	0	0	0	0
chr1	111376102	111389927	13826	DEL	TRUE	18	0	0	0	0
chr1	111717289	111718954	1666	DEL	TRUE	0	0	0	0	0
chr1	111827530	111851331	23802	DEL	TRUE	53	0	0	0	0
chr1	111928314	111934489	6176	DEL	TRUE	16	0	0	0	0
chr1	112619175	112620385	1211	DEL	TRUE	1	0	0	0	0
chr1	112667160	112677250	10091	DEL	TRUE	28	0	0	0	0
chr1	112690871	112707656	16786	DEL	TRUE	60	0	0	0	0
chr1	113298514	113303119	4606	DEL	TRUE	12	0	0	0	0
chr1	113515574	113522611	7038	DEL	TRUE	7	0	0	0	0
chr1	113742303	113752401	10099	DEL	TRUE	24	2	0	0	0
chr1	114298153	114300549	2397	DEL	TRUE	1	0	0	0	0
chr1	114813682	114821317	7636	DEL	TRUE	12	0	0	0	0
chr1	115311978	115317878	5901	DUP	TRUE	2	0	0	0	0
chr1	115364455	115380591	16137	DUP	TRUE	39	0	0	0	0
chr1	116118974	116136026	17053	DEL	TRUE	53	0	0	0	1
chr1	116138454	116228153	89700	DUP	TRUE	269	0	0	2	2
chr1	116228153	116233562	5410	DEL	TRUE	6	0	0	0	0
chr1	116233562	116349965	116404	DUP	TRUE	401	2	0	1	3
chr1	116485050	116494324	9275	DEL	TRUE	11	0	0	0	1
chr1	116707103	116709972	2870	DEL	TRUE	4	0	0	0	0
chr1	118868491	118871147	2657	DEL	TRUE	9	0	0	0	0
chr1	119198244	119224953	26710	DEL	TRUE	58	0	0	1	0
chr1	119480895	119484040	3146	DEL	TRUE	4	0	0	0	0
chr1	120096044	120106682	10639	DUP	FALSE	8	0	0	2	4
chr1	120101363	120119485	18123	DUP	FALSE	47	0	0	0	4
chr1	120104237	120110107	5871	DUP	TRUE	7	0	0	0	2
chr1	120105887	120106682	796	DEL	TRUE	0	0	0	0	0
chr1	120107871	120110107	2237	DUP	FALSE	6	0	0	0	0
chr1	120111009	120113205	2197	DUP	TRUE	10	0	0	0	0
chr1	120111009	120128864	17856	DUP	FALSE	73	0	0	0	0
chr1	120113205	120113513	309	DUP	FALSE	1	0	0	0	0
chr1	120125121	120155174	30054	DUP	FALSE	93	0	0	0	0
chr1	120139258	120143201	3944	DUP	FALSE	10	0	0	0	0
chr1	120143201	120151645	8445	DUP	FALSE	24	0	0	0	0
chr1	120151145	120151645	501	DUP	FALSE	0	0	0	0	0
chr1	120151645	120155174	3530	DUP	FALSE	16	0	0	0	0
chr1	120361116	120370133	9018	DEL	TRUE	14	0	0	0	0
chr1	120531252	120663489	132238	DUP	FALSE	152	163	0	4	60
chr1	120531252	120632288	101037	DUP	FALSE	113	146	0	4	45
chr1	120550433	120632388	81956	DUP	FALSE	93	117	0	4	37
chr1	120747274	120765533	18260	DUP	FALSE	5	35	0	0	9
chr1	121087890	121150305	62416	DUP	FALSE	63	149	0	4	29
chr1	121106625	121150305	43681	DUP	FALSE	42	149	0	4	29
chr1	142782992	142966207	183216	DUP	FALSE	9	677	0	69	568
chr1	143117904	143286555	168652	DUP	FALSE	252	890	0	37	434
chr1	143244181	143291883	47703	DUP	FALSE	84	265	0	13	134
chr1	143270950	143291883	20934	DUP	FALSE	39	154	0	5	51
chr1	143286555	143291883	5329	DUP	FALSE	11	5	0	1	12
chr1	143343095	143346454	3360	DUP	FALSE	0	16	0	0	10
chr1	143343095	143344295	1201	DUP	FALSE	0	11	0	0	4
chr1	143343095	143544442	201348	DUP	FALSE	12	1235	0	51	665
chr1	143645795	143648120	2326	DUP	FALSE	1	0	0	0	0
chr1	143648120	143664598	16479	DUP	FALSE	11	71	0	0	0
chr1	143668630	143671619	2990	DUP	FALSE	0	0	0	0	3
chr1	143668630	143669746	1117	DUP	FALSE	0	0	0	0	0
chr1	143668630	143695957	27328	DUP	FALSE	8	0	0	0	4
chr1	143668630	143672171	3542	DUP	FALSE	1	0	0	0	3
chr1	143668630	143673493	4864	DUP	FALSE	1	0	0	0	4
chr1	143669746	143672171	2426	DUP	FALSE	1	0	0	0	3
chr1	143673493	143697899	24407	DUP	FALSE	7	0	0	0	0
chr1	143699358	143699873	516	DUP	FALSE	0	0	0	0	0
chr1	143699358	143721248	21891	DUP	FALSE	25	1	0	1	0
chr1	143708706	143717385	8680	DUP	FALSE	16	0	0	1	0
chr1	143709152	143721248	12097	DUP	FALSE	21	0	0	1	0
chr1	143709598	143721248	11651	DUP	FALSE	21	0	0	1	0
chr1	143709598	143717385	7788	DUP	FALSE	15	0	0	1	0
chr1	143720002	143721248	1247	DUP	FALSE	1	0	0	0	0
chr1	143873213	143985818	112606	DUP	FALSE	29	67	0	1	17
chr1	143913445	143913645	201	DUP	FALSE	0	0	0	0	0
chr1	143913645	143985818	72174	DUP	FALSE	17	58	0	1	13
chr1	143986662	144017106	30445	DUP	FALSE	7	105	0	0	11
chr1	143986662	144045374	58713	DUP	FALSE	11	155	0	0	27
chr1	143986662	144091939	105278	DUP	FALSE	39	211	0	0	31
chr1	144017106	144045374	28269	DUP	FALSE	4	50	0	0	16
chr1	144017106	144026283	9178	DUP	FALSE	2	25	0	0	5
chr1	144026283	144028624	2342	DUP	FALSE	0	0	0	0	1
chr1	144045274	144045374	101	DUP	FALSE	0	0	0	0	0
chr1	144091939	144094909	2971	DUP	FALSE	2	2	0	0	0
chr1	144093238	144095775	2538	DUP	FALSE	2	4	0	0	0
chr1	144093238	144094909	1672	DUP	FALSE	1	2	0	0	0
chr1	144093238	144095342	2105	DUP	FALSE	2	4	0	0	0
chr1	144094909	144095775	867	DUP	FALSE	1	2	0	0	0
chr1	144146792	144224420	77629	DUP	FALSE	4	3	0	0	1
chr1	144274620	144292174	17555	DUP	FALSE	18	1	0	0	2
chr1	144294333	144400682	106350	DUP	FALSE	43	27	1	1	13
chr1	144452805	144456917	4113	DUP	FALSE	5	2	0	0	1
chr1	144456917	144472316	15400	DUP	FALSE	20	1	0	0	1
chr1	144482042	144482471	430	DUP	FALSE	1	0	0	0	0
chr1	144482471	144488959	6489	DUP	FALSE	9	1	0	0	1
chr1	144488959	144522495	33537	DUP	FALSE	41	26	0	0	2
chr1	144612537	144622084	9548	DUP	FALSE	34	12	0	0	5
chr1	144672660	144708985	36326	DUP	FALSE	113	34	0	1	23
chr1	144863780	144866335	2556	DUP	FALSE	6	7	0	0	0
chr1	144876584	144881590	5007	DUP	FALSE	6	16	0	0	1
chr1	144884342	144885171	830	DUP	FALSE	0	4	0	0	1
chr1	144895650	144906613	10964	DUP	FALSE	5	1	0	0	0
chr1	144906613	144908385	1773	DUP	FALSE	2	5	0	0	1
chr1	144908385	144910495	2111	DUP	FALSE	7	8	0	0	1
chr1	144913569	144931782	18214	DUP	FALSE	14	76	0	0	4
chr1	144932302	144948483	16182	DUP	FALSE	23	59	0	0	3
chr1	144950287	144955850	5564	DUP	FALSE	9	10	0	0	2
chr1	144950287	145081100	130814	DUP	FALSE	314	455	0	2	86
chr1	144950287	144952466	2180	DUP	FALSE	2	7	0	0	0
chr1	144950287	144954158	3872	DUP	FALSE	3	8	0	0	1
chr1	144952466	144955850	3385	DUP	FALSE	7	3	0	0	2
chr1	144955850	145081100	125251	DUP	FALSE	305	445	0	2	84
chr1	145096445	145120773	24329	DUP	FALSE	37	110	0	0	8
chr1	145120773	145183781	63009	DUP	FALSE	93	41	0	1	21
chr1	145183781	145199994	16214	DUP	FALSE	32	20	0	1	22
chr1	145185836	145199994	14159	DUP	FALSE	32	15	0	1	18
chr1	145199994	145202755	2762	DUP	FALSE	3	1	0	0	0
chr1	145202755	145269221	66467	DUP	FALSE	97	138	0	1	40
chr1	145270872	145273281	2410	DUP	FALSE	1	3	0	0	1
chr1	145270872	145368788	97917	DUP	FALSE	96	179	0	3	42
chr1	145610540	145626062	15523	DUP	FALSE	33	8	0	0	2
chr1	145619295	145833107	213813	DUP	TRUE	215	9	0	0	1
chr1	145619295	145622902	3608	DUP	FALSE	9	5	0	0	0
chr1	145688514	145695900	7387	DUP	TRUE	15	0	0	0	0
chr1	145747244	145817927	70684	DUP	FALSE	0	0	0	0	0
chr1	145883788	145944320	60533	DUP	FALSE	0	0	0	0	0
chr1	145941761	145944320	2560	DUP	FALSE	0	0	0	0	0
chr1	145944620	145984927	40308	DUP	FALSE	0	0	0	0	0
chr1	145984927	146017907	32981	DUP	FALSE	0	0	0	0	0
chr1	146214763	146253252	38490	DUP	FALSE	0	0	0	0	0
chr1	146352157	146367582	15426	DUP	FALSE	24	0	0	0	0
chr1	146367682	146373564	5883	DUP	FALSE	16	0	0	0	1
chr1	146374569	146466519	91951	DUP	FALSE	111	14	0	2	3
chr1	146481779	146490417	8639	DUP	FALSE	23	59	0	0	5
chr1	146617387	146619111	1725	DUP	TRUE	2	0	0	0	0
chr1	147325790	147341005	15216	DUP	TRUE	12	0	0	0	0
chr1	147384646	147386567	1922	DEL	TRUE	0	0	0	0	0
chr1	147406490	147498847	92358	DUP	FALSE	39	13	0	0	1
chr1	147486138	147530472	44335	DUP	FALSE	80	38	0	0	0
chr1	147496865	147498847	1983	DUP	FALSE	2	3	0	0	0
chr1	147498847	147530472	31626	DUP	FALSE	61	25	0	0	0
chr1	147532878	147601791	68914	DUP	FALSE	51	5	0	1	3
chr1	147532878	147602041	69164	DUP	FALSE	51	5	0	1	3
chr1	147532878	147622765	89888	DUP	FALSE	65	5	0	1	3
chr1	147601791	147602041	251	DUP	FALSE	0	0	0	0	0
chr1	147602041	147620971	18931	DUP	FALSE	12	0	0	0	0
chr1	147602041	147618488	16448	DUP	FALSE	12	0	0	0	0
chr1	147618488	147620971	2484	DUP	FALSE	0	0	0	0	0
chr1	147622765	147624044	1280	DUP	FALSE	0	0	0	0	0
chr1	147624529	147628018	3490	DUP	FALSE	3	0	0	0	0
chr1	147624529	147626727	2199	DUP	FALSE	2	0	0	0	0
chr1	147626727	147629781	3055	DUP	FALSE	3	0	0	0	0
chr1	147626727	147630485	3759	DUP	TRUE	5	0	0	0	0
chr1	147630485	147631191	707	DUP	FALSE	4	0	0	0	0
chr1	147630485	147631491	1007	DUP	FALSE	6	0	0	0	0
chr1	147635342	147718555	83214	DUP	FALSE	89	52	0	0	6
chr1	147784424	147788242	3819	DUP	FALSE	7	0	0	0	0
chr1	147789612	147789784	173	DUP	FALSE	0	0	0	0	0
chr1	147856243	147878456	22214	DUP	FALSE	38	0	0	0	3
chr1	147856243	147857209	967	DUP	FALSE	19	0	0	0	0
chr1	147883254	147890035	6782	DUP	FALSE	1	0	0	0	0
chr1	147890035	147908760	18726	DUP	FALSE	24	3	0	0	0
chr1	147909069	148026036	116968	DUP	FALSE	75	64	1	1	26
chr1	148001423	148004311	2889	DUP	FALSE	5	4	0	0	5
chr1	148001423	148026036	24614	DUP	FALSE	25	24	1	0	20
chr1	148004311	148026036	21726	DUP	FALSE	20	20	1	0	15
chr1	148176695	148218952	42258	DUP	FALSE	10	57	0	0	7
chr1	148218952	148361013	142062	DUP	FALSE	29	70	0	3	22
chr1	148511499	148553018	41520	DUP	FALSE	24	213	0	2	15
chr1	148511499	148680725	169227	DUP	FALSE	81	409	0	5	65
chr1	148553018	148595037	42020	DUP	FALSE	23	107	0	0	9
chr1	148588867	148595037	6171	DUP	FALSE	4	0	0	0	0
chr1	148588867	148680725	91859	DUP	FALSE	38	89	0	3	41
chr1	148595037	148597570	2534	DUP	FALSE	1	2	0	0	0
chr1	148736585	148758352	21768	DUP	FALSE	6	10	0	0	5
chr1	148736585	148865155	128571	DUP	FALSE	66	200	0	9	93
chr1	148736585	148820721	84137	DUP	FALSE	27	57	0	0	14
chr1	148736585	148951524	214940	DUP	FALSE	158	459	0	16	143
chr1	148820721	148865155	44435	DUP	FALSE	39	144	0	9	79
chr1	149005200	149036436	31237	DUP	FALSE	48	230	0	9	63
chr1	149037005	149068307	31303	DUP	FALSE	48	3	0	0	0
chr1	149068307	149095518	27212	DUP	FALSE	23	0	0	2	2
chr1	149068307	149114963	46657	DUP	FALSE	41	8	0	2	2
chr1	149081912	149105240	23329	DUP	FALSE	18	0	0	0	0
chr1	149093107	149137677	44571	DUP	FALSE	42	9	0	2	0
chr1	149095518	149114963	19446	DUP	FALSE	18	8	0	0	0
chr1	149117907	149137677	19771	DUP	FALSE	19	1	0	2	0
chr1	149117907	149138701	20795	DUP	FALSE	20	1	0	2	0
chr1	149138701	149141704	3004	DUP	FALSE	3	0	0	0	0
chr1	149138701	149144314	5614	DUP	FALSE	8	0	0	0	0
chr1	149144314	149215452	71139	DUP	FALSE	56	260	0	1	11
chr1	149144314	149151529	7216	DUP	FALSE	8	0	0	0	0
chr1	149215452	149225203	9752	DUP	FALSE	20	128	0	0	10
chr1	149225203	149241031	15829	DUP	FALSE	20	104	0	0	17
chr1	149241031	149245199	4169	DUP	FALSE	4	0	0	0	0
chr1	149245199	149258795	13597	DUP	FALSE	24	23	0	0	6
chr1	149245199	149258995	13797	DUP	FALSE	24	23	0	0	6
chr1	149245199	149282497	37299	DUP	FALSE	54	95	0	1	13
chr1	149258795	149258995	201	DUP	FALSE	0	0	0	0	0
chr1	149258995	149282497	23503	DUP	FALSE	30	72	0	1	7
chr1	149282497	149297317	14821	DUP	FALSE	17	23	0	2	12
chr1	149297317	149344066	46750	DUP	FALSE	56	116	0	1	19
chr1	149344216	149459582	115367	DUP	FALSE	115	45	0	0	17
chr1	149510081	149596911	86831	DUP	FALSE	45	22	0	0	14
chr1	149623168	149623380	213	DUP	FALSE	0	0	0	0	0
chr1	149624984	149626176	1193	DUP	FALSE	1	0	0	0	0
chr1	149624984	149644767	19784	DUP	FALSE	42	5	0	0	2
chr1	149626176	149644767	18592	DUP	FALSE	41	5	0	0	2
chr1	149673676	149682845	9170	DUP	FALSE	27	4	0	0	15
chr1	149673676	149681427	7752	DUP	FALSE	25	4	0	0	13
chr1	149674224	149682845	8622	DUP	FALSE	26	4	0	0	15
chr1	149674224	149681427	7204	DUP	FALSE	24	4	0	0	13
chr1	149674224	149783561	109338	DUP	FALSE	71	36	0	1	18
chr1	149683599	149783561	99963	DUP	FALSE	43	32	0	1	3
chr1	149783963	149793665	9703	DUP	FALSE	19	0	0	0	2
chr1	149783963	149797478	13516	DUP	FALSE	21	0	0	0	2
chr1	149783963	149786241	2279	DUP	FALSE	5	0	0	0	0
chr1	149785055	149786241	1187	DUP	FALSE	1	0	0	0	0
chr1	149785055	149793665	8611	DUP	FALSE	15	0	0	0	2
chr1	149785055	149797478	12424	DUP	FALSE	17	0	0	0	2
chr1	149786241	149797478	11238	DUP	FALSE	16	0	0	0	2
chr1	149786241	149793665	7425	DUP	FALSE	14	0	0	0	2
chr1	149793665	149797478	3814	DUP	FALSE	2	0	0	0	0
chr1	149800845	149806574	5730	DUP	TRUE	6	0	0	0	0
chr1	149860386	149871922	11537	DUP	TRUE	25	0	0	0	0
chr1	150338724	150347414	8691	DEL	TRUE	16	0	0	1	2
chr1	150860147	150864189	4043	DEL	TRUE	9	0	0	0	0
chr1	151286071	151288357	2287	DUP	FALSE	2	0	0	0	0
chr1	152403186	152535345	132160	DUP	TRUE	367	3	0	4	3
chr1	152517350	152555489	38140	DEL	TRUE	102	0	0	0	0
chr1	152517350	152590206	72857	DEL	TRUE	116	0	1	0	1
chr1	152535445	152555489	20045	DUP	TRUE	19	0	0	0	0
chr1	152555489	152590206	34718	DEL	TRUE	14	0	1	0	1
chr1	152590206	152708135	117930	DUP	TRUE	257	0	0	1	2
chr1	152648227	152660376	12150	DUP	TRUE	24	0	0	0	0
chr1	152759388	152771208	11821	DEL	TRUE	3	0	0	0	0
chr1	152922562	152924691	2130	DEL	TRUE	7	0	0	0	0
chr1	153043646	153067061	23416	DUP	FALSE	78	6	0	0	0
chr1	153043846	153045248	1403	DUP	TRUE	7	0	0	0	0
chr1	153671716	153698544	26829	DUP	TRUE	32	1	0	0	1
chr1	153729654	153732900	3247	DUP	TRUE	4	0	0	0	0
chr1	154157446	154163039	5594	DEL	TRUE	10	0	0	0	0
chr1	154927557	154929340	1784	DUP	TRUE	1	0	0	0	0
chr1	154931908	154932008	101	DUP	FALSE	0	0	0	0	0
chr1	155179189	155185450	6262	DUP	FALSE	6	0	0	0	0
chr1	155179189	155217559	38371	DUP	FALSE	57	0	0	0	0
chr1	155179189	155188128	8940	DUP	FALSE	8	0	0	0	0
chr1	155186628	155188528	1901	DUP	FALSE	2	0	0	0	0
chr1	155187728	155202481	14754	DEL	TRUE	27	0	0	0	0
chr1	155187728	155188528	801	DEL	TRUE	0	0	0	0	0
chr1	155188731	155197337	8607	DUP	TRUE	11	0	0	0	0
chr1	155188731	155209551	20821	DUP	FALSE	39	0	0	0	0
chr1	155188731	155199031	10301	DUP	TRUE	18	0	0	0	0
chr1	155195010	155199031	4022	DUP	FALSE	13	0	0	0	0
chr1	155199031	155203999	4969	DUP	FALSE	11	0	0	0	0
chr1	155202481	155209551	7071	DUP	FALSE	12	0	0	0	0
chr1	155203999	155209551	5553	DUP	FALSE	10	0	0	0	0
chr1	155203999	155205234	1236	DUP	FALSE	1	0	0	0	0
chr1	155560864	155658842	97979	DUP	FALSE	96	3	0	3	8
chr1	156682786	156690796	8011	DEL	TRUE	19	0	0	0	1
chr1	156953771	156956151	2381	DUP	TRUE	5	0	0	0	0
chr1	157173514	157175242	1729	DEL	TRUE	1	0	0	0	0
chr1	157324259	157329937	5679	DEL	TRUE	5	0	0	0	0
chr1	157694902	157700036	5135	DEL	TRUE	2	0	0	0	0
chr1	158083104	158088117	5014	DUP	TRUE	10	0	0	0	0
chr1	158431581	158440796	9216	DEL	TRUE	25	0	0	0	1
chr1	158516728	158522592	5865	DEL	TRUE	18	0	0	0	0
chr1	158698345	158708986	10642	DUP	TRUE	51	0	0	0	0
chr1	158726475	158728390	1916	DEL	TRUE	6	0	0	0	0
chr1	158790827	158800592	9766	DEL	TRUE	16	0	0	0	0
chr1	158832779	158843544	10766	DEL	TRUE	87	0	0	0	0
chr1	158863941	158870830	6890	DEL	TRUE	34	0	0	0	0
chr1	158960017	158967897	7881	DEL	TRUE	4	0	0	0	1
chr1	159011974	159019217	7244	DUP	FALSE	20	0	0	0	0
chr1	159013770	159016100	2331	DUP	FALSE	7	0	0	0	0
chr1	159014798	159019217	4420	DUP	TRUE	2	0	0	0	0
chr1	159065832	159069483	3652	DEL	TRUE	4	0	0	0	0
chr1	159117936	159126801	8866	DEL	TRUE	5	0	0	0	0
chr1	159648238	159650241	2004	DEL	TRUE	2	0	0	0	0
chr1	160125700	160136327	10628	DEL	TRUE	24	0	0	0	0
chr1	160958393	160963640	5248	DEL	TRUE	12	0	0	0	0
chr1	161269161	161275762	6602	DUP	TRUE	14	0	0	0	0
chr1	161399282	161452584	53303	DUP	FALSE	52	5	0	0	3
chr1	161480422	161646940	166519	DUP	FALSE	612	9	1	3	35
chr1	162578911	162588243	9333	DUP	TRUE	12	0	0	0	0
chr1	164416341	164440297	23957	DEL	TRUE	3	0	0	2	1
chr1	164748032	164751516	3485	DEL	TRUE	3	0	0	0	0
chr1	165421742	165424655	2914	DEL	TRUE	10	0	0	0	0
chr1	166172974	166232304	59331	DUP	TRUE	212	0	0	0	5
chr1	166533984	166535949	1966	DUP	FALSE	8	0	0	0	1
chr1	166913252	166914755	1504	DEL	TRUE	1	0	0	0	0
chr1	167765175	167769142	3968	DEL	TRUE	15	0	0	0	0
chr1	168087209	168093563	6355	DEL	TRUE	7	0	0	0	0
chr1	168211103	168215081	3979	DUP	TRUE	8	0	0	0	0
chr1	168287707	168290583	2877	DEL	TRUE	6	0	0	0	0
chr1	168571670	168574517	2848	DEL	TRUE	9	0	0	0	0
chr1	168891664	168893959	2296	DEL	TRUE	7	0	0	0	0
chr1	169002965	169014384	11420	DEL	TRUE	25	0	0	0	0
chr1	169025985	169038992	13008	DEL	TRUE	20	0	0	0	0
chr1	169143155	169149806	6652	DEL	TRUE	23	0	0	0	0
chr1	169216544	169254678	38135	DEL	TRUE	65	4	14	0	1
chr1	169441312	169443924	2613	DEL	TRUE	5	0	0	0	0
chr1	169442121	169443924	1804	DUP	FALSE	4	0	0	0	0
chr1	169526107	169529610	3504	DUP	TRUE	17	0	0	0	0
chr1	170564095	170603461	39367	DEL	TRUE	77	2	0	3	0
chr1	171091189	171106566	15378	DEL	TRUE	13	0	0	0	0
chr1	171114797	171117470	2674	DUP	TRUE	2	0	0	0	0
chr1	171127549	171133541	5993	DEL	TRUE	15	1	0	0	0
chr1	171780932	171789197	8266	DEL	TRUE	31	0	0	0	1
chr1	172678338	172682676	4339	DEL	TRUE	10	0	0	0	0
chr1	172918437	172923849	5413	DEL	TRUE	10	0	0	0	0
chr1	173070738	173083278	12541	DUP	TRUE	15	0	0	1	0
chr1	173447337	173448726	1390	DUP	TRUE	0	0	0	0	0
chr1	173962022	173969772	7751	DEL	TRUE	1	0	0	0	0
chr1	174010039	174019825	9787	DEL	TRUE	1	0	0	1	1
chr1	174140351	174248565	108215	DEL	TRUE	132	0	0	0	7
chr1	174248565	174477101	228537	DEL	TRUE	309	8	0	4	8
chr1	174611389	174623634	12246	DEL	TRUE	16	0	0	0	0
chr1	174794556	174803623	9068	DEL	TRUE	12	0	0	0	0
chr1	174897634	174907947	10314	DEL	TRUE	16	1	0	0	1
chr1	175021689	175029949	8261	DEL	TRUE	15	0	0	1	0
chr1	175411082	175412386	1305	DEL	TRUE	0	0	0	0	0
chr1	176955109	176958511	3403	DUP	TRUE	4	0	0	0	0
chr1	177387935	177389775	1841	DUP	TRUE	4	0	0	0	0
chr1	177904951	177906251	1301	DEL	TRUE	5	0	0	0	0
chr1	178054411	178058042	3632	DEL	TRUE	1	0	0	0	0
chr1	178119709	178133462	13754	DEL	TRUE	10	0	0	0	0
chr1	178138731	178142544	3814	DEL	TRUE	1	0	0	0	0
chr1	178491745	178496599	4855	DEL	TRUE	9	0	0	0	0
chr1	178623657	178629447	5791	DEL	TRUE	11	0	0	0	0
chr1	178659407	178676797	17391	DEL	TRUE	89	0	0	0	1
chr1	178661132	178848103	186972	DUP	TRUE	278	0	0	1	4
chr1	178715811	178719743	3933	DUP	FALSE	3	0	0	0	0
chr1	178924201	178938752	14552	DUP	TRUE	27	0	0	0	1
chr1	179222838	179253806	30969	DUP	TRUE	46	1	0	0	0
chr1	179261830	179263558	1729	DUP	TRUE	3	0	0	0	0
chr1	179328832	179334176	5345	DEL	TRUE	18	0	0	0	0
chr1	179514812	179518899	4088	DEL	TRUE	17	0	0	0	0
chr1	179702173	179727283	25111	DUP	TRUE	45	0	0	0	0
chr1	179804879	179808971	4093	DEL	TRUE	11	0	0	0	0
chr1	180226701	180231052	4352	DEL	TRUE	8	0	0	0	0
chr1	180745954	180756227	10274	DEL	TRUE	7	0	9	0	0
chr1	181002523	181003423	901	DEL	TRUE	3	0	0	0	0
chr1	181144726	181150162	5437	DUP	TRUE	27	0	0	0	0
chr1	181693356	181697077	3722	DUP	TRUE	2	0	0	0	0
chr1	182083603	182088196	4594	DEL	TRUE	12	0	0	0	0
chr1	182179263	182182764	3502	DUP	TRUE	9	0	0	0	0
chr1	182492609	182496877	4269	DEL	TRUE	23	0	0	0	0
chr1	182775916	182782532	6617	DEL	TRUE	2	0	0	0	0
chr1	183054028	183056631	2604	DEL	TRUE	5	0	0	0	0
chr1	183307923	183309954	2032	DEL	TRUE	11	0	0	0	0
chr1	183554821	183557350	2530	DEL	TRUE	9	0	0	0	0
chr1	183797397	183803620	6224	DEL	TRUE	23	0	0	0	0
chr1	183971259	183976898	5640	DEL	TRUE	8	0	0	0	0
chr1	184188514	184189746	1233	DEL	TRUE	4	0	0	0	0
chr1	184959415	184977821	18407	DEL	TRUE	22	0	0	0	1
chr1	185009435	185011771	2337	DEL	TRUE	0	0	1	0	0
chr1	185414698	185418988	4291	DEL	TRUE	0	0	0	0	0
chr1	185784174	185785503	1330	DEL	TRUE	0	0	0	0	0
chr1	187065577	187069882	4306	DEL	TRUE	15	0	0	0	0
chr1	187295510	187303719	8210	DEL	TRUE	17	0	0	0	0
chr1	187461038	187466927	5890	DEL	TRUE	10	0	0	0	0
chr1	187509247	187546738	37492	DUP	TRUE	49	0	0	5	2
chr1	187537491	187539339	1849	DUP	TRUE	3	0	0	0	0
chr1	187559270	187584339	25070	DEL	TRUE	47	0	0	0	1
chr1	187573265	187584339	11075	DUP	TRUE	24	0	0	0	0
chr1	187586978	187595837	8860	DUP	TRUE	20	0	0	1	0
chr1	187592977	187597688	4712	DEL	TRUE	15	0	0	0	0
chr1	187715163	187722772	7610	DEL	TRUE	0	0	0	0	0
chr1	188496815	188505604	8790	DEL	TRUE	12	0	0	0	0
chr1	188634906	188656782	21877	DEL	TRUE	53	0	0	0	3
chr1	188794078	188808740	14663	DUP	TRUE	3	0	0	0	0
chr1	188958471	188967216	8746	DEL	TRUE	13	0	0	0	0
chr1	189022411	189031783	9373	DEL	TRUE	32	1	0	0	0
chr1	189029425	189037328	7904	DEL	TRUE	24	0	0	0	0
chr1	189081998	189100177	18180	DEL	TRUE	26	0	0	0	0
chr1	189197426	189347296	149871	DEL	TRUE	283	3	0	5	3
chr1	189234222	189248490	14269	DEL	TRUE	43	0	0	1	0
chr1	189243470	189247242	3773	DEL	TRUE	8	0	0	0	0
chr1	189319077	189445706	126630	DEL	TRUE	127	5	0	8	5
chr1	189325460	189544615	219156	DEL	TRUE	279	5	0	10	5
chr1	189330207	189335745	5539	DUP	TRUE	7	0	0	0	0
chr1	189416994	189437384	20391	DEL	TRUE	18	0	0	2	0
chr1	189532743	189617179	84437	DEL	TRUE	181	0	0	4	0
chr1	189731290	189736286	4997	DUP	TRUE	2	0	1	0	0
chr1	189760053	189761632	1580	DEL	TRUE	1	0	0	0	0
chr1	189968965	189992676	23712	DEL	TRUE	97	0	0	1	0
chr1	190182185	190186595	4411	DUP	TRUE	9	0	0	0	0
chr1	190309688	190312209	2522	DEL	TRUE	3	0	0	0	0
chr1	190325539	190329315	3777	DEL	TRUE	5	0	0	0	0
chr1	190368321	190371701	3381	DEL	TRUE	4	0	0	0	0
chr1	191005093	191010940	5848	DEL	TRUE	24	0	0	0	0
chr1	191032037	191041627	9591	DEL	TRUE	21	1	0	0	0
chr1	191642199	191645664	3466	DUP	TRUE	6	0	0	0	0
chr1	191716857	191727052	10196	DEL	TRUE	23	0	0	0	0
chr1	191819549	191826368	6820	DEL	TRUE	11	0	0	0	0
chr1	191826368	191869070	42703	DEL	TRUE	149	0	0	0	0
chr1	192078702	192085489	6788	DEL	TRUE	16	0	0	0	0
chr1	192082272	192085489	3218	DEL	TRUE	7	0	0	0	0
chr1	192097925	192101217	3293	DUP	TRUE	3	0	0	1	0
chr1	192458804	192460506	1703	DEL	TRUE	1	0	0	0	0
chr1	192859111	192862741	3631	DEL	TRUE	7	0	0	0	0
chr1	192962517	192976565	14049	DUP	TRUE	9	0	0	0	0
chr1	193529946	193534824	4879	DEL	TRUE	9	0	0	0	0
chr1	193648270	193655623	7354	DEL	TRUE	16	0	0	0	0
chr1	193968340	193969833	1494	DEL	TRUE	4	0	0	0	0
chr1	194050165	194060987	10823	DEL	TRUE	23	3	0	0	1
chr1	194827275	194832536	5262	DEL	TRUE	11	0	0	0	1
chr1	194917095	194937858	20764	DEL	TRUE	57	0	0	0	0
chr1	194935902	194951786	15885	DEL	TRUE	37	0	0	0	0
chr1	195013533	195020996	7464	DEL	TRUE	23	0	0	1	1
chr1	195049118	195071848	22731	DUP	TRUE	135	0	0	1	0
chr1	195218274	195230779	12506	DUP	TRUE	15	0	0	0	0
chr1	195231292	195278450	47159	DUP	TRUE	79	0	0	1	0
chr1	195285471	195389995	104525	DUP	TRUE	136	0	0	1	0
chr1	195299286	195317345	18060	DUP	TRUE	23	0	0	0	0
chr1	195407705	195422315	14611	DEL	TRUE	19	0	0	0	0
chr1	195519608	195530980	11373	DEL	TRUE	39	0	0	0	0
chr1	196711121	196824857	113737	DUP	FALSE	299	12	0	2	5
chr1	196711121	196919131	208011	DUP	FALSE	397	12	0	4	8
chr1	196825164	196839837	14674	DUP	TRUE	8	0	0	0	0
chr1	196827520	196857377	29858	DUP	TRUE	33	0	0	1	0
chr1	196843013	196847042	4030	DUP	TRUE	7	0	0	1	0
chr1	196843013	196855144	12132	DUP	TRUE	18	0	0	1	0
chr1	196854257	196855144	888	DUP	TRUE	2	0	0	0	0
chr1	196857377	196861750	4374	DUP	FALSE	5	0	0	0	0
chr1	196857377	196871146	13770	DUP	TRUE	13	0	0	0	0
chr1	196861750	196876682	14933	DUP	TRUE	11	0	0	0	0
chr1	196871396	196880181	8786	DUP	TRUE	7	0	0	0	1
chr1	196880181	196919131	38951	DUP	TRUE	45	0	0	1	2
chr1	196937116	196945328	8213	DUP	TRUE	8	0	0	0	0
chr1	196937116	196952360	15245	DEL	TRUE	17	0	0	0	0
chr1	197671271	197675261	3991	DEL	TRUE	3	0	0	0	0
chr1	197683610	197689858	6249	DUP	TRUE	9	0	0	0	0
chr1	197893603	197894701	1099	DEL	TRUE	3	0	0	0	0
chr1	198304282	198311495	7214	DEL	TRUE	10	0	0	1	0
chr1	198954719	198960484	5766	DEL	TRUE	8	0	0	0	0
chr1	199109343	199114389	5047	DEL	TRUE	1	0	0	0	0
chr1	199491069	199493224	2156	DEL	TRUE	3	0	0	0	0
chr1	199493224	199496990	3767	DEL	TRUE	4	0	0	0	0
chr1	199596035	199600900	4866	DUP	TRUE	26	0	0	0	0
chr1	199693796	199702625	8830	DEL	TRUE	22	0	0	0	0
chr1	200219146	200221509	2364	DEL	TRUE	6	0	0	0	0
chr1	200830170	200833044	2875	DEL	TRUE	6	0	0	0	0
chr1	201313127	201316573	3447	DEL	TRUE	8	0	0	0	0
chr1	202301592	202311227	9636	DEL	TRUE	14	0	0	0	0
chr1	202598231	202600498	2268	DUP	FALSE	5	0	0	0	0
chr1	202834553	202844700	10148	DUP	TRUE	38	0	0	0	1
chr1	203165063	203169688	4626	DEL	TRUE	9	0	0	0	0
chr1	203877707	203901808	24102	DUP	TRUE	48	1	0	0	4
chr1	203892158	203901808	9651	DEL	TRUE	12	0	0	0	0
chr1	203894680	203901808	7129	DEL	TRUE	9	0	0	0	0
chr1	203907754	203916332	8579	DEL	TRUE	27	0	0	0	0
chr1	203967055	203977106	10052	DUP	TRUE	30	0	0	0	0
chr1	204380861	204383316	2456	DEL	TRUE	5	0	0	0	0
chr1	204570059	204572901	2843	DEL	TRUE	3	0	0	0	0
chr1	204984298	204997831	13534	DUP	TRUE	22	0	0	0	1
chr1	204993191	204997831	4641	DUP	TRUE	8	0	0	0	0
chr1	205104042	205110228	6187	DEL	TRUE	13	0	0	0	0
chr1	205164874	205171383	6510	DEL	TRUE	6	0	0	0	0
chr1	206199342	206206354	7013	DEL	TRUE	11	0	0	0	0
chr1	206280873	206290247	9375	DEL	TRUE	12	0	0	1	1
chr1	206316068	206331251	15184	DEL	TRUE	20	0	0	0	0
chr1	206555003	206584860	29858	DUP	FALSE	5	44	0	0	7
chr1	207323495	207348397	24903	DEL	TRUE	12	0	0	0	0
chr1	207737331	207737823	493	DUP	FALSE	0	0	0	0	0
chr1	207737823	207739263	1441	DUP	FALSE	0	0	0	0	0
chr1	207739363	207743430	4068	DUP	FALSE	1	0	0	0	0
chr1	207839331	207849064	9734	DUP	TRUE	1	0	0	0	0
chr1	207842353	207849064	6712	DUP	TRUE	1	0	0	0	0
chr1	207867913	207869737	1825	DUP	FALSE	0	0	0	0	0
chr1	208015889	208021319	5431	DEL	TRUE	13	0	0	0	0
chr1	208443335	208458107	14773	DUP	TRUE	30	0	0	0	0
chr1	208643070	208645749	2680	DEL	TRUE	8	0	0	0	0
chr1	209250463	209258335	7873	DEL	TRUE	14	0	0	0	1
chr1	209393439	209396183	2745	DEL	TRUE	2	0	0	1	0
chr1	209759308	209761468	2161	DEL	TRUE	2	0	0	0	0
chr1	210006448	210008049	1602	DEL	TRUE	7	0	0	0	0
chr1	210075855	210086936	11082	DEL	TRUE	11	0	4	0	0
chr1	210593012	210614891	21880	DEL	TRUE	74	0	0	0	0
chr1	210722153	210725220	3068	DEL	TRUE	5	0	0	0	0
chr1	210730736	210733059	2324	DEL	TRUE	2	0	0	0	0
chr1	211654763	211657190	2428	DEL	TRUE	1	0	0	0	0
chr1	211655130	211657190	2061	DUP	FALSE	1	0	0	0	0
chr1	212446467	212450349	3883	DEL	TRUE	8	0	0	0	0
chr1	213002314	213009581	7268	DUP	FALSE	30	0	0	0	0
chr1	213123817	213128764	4948	DUP	TRUE	7	0	0	0	0
chr1	215110421	215113766	3346	DEL	TRUE	16	0	0	0	0
chr1	215491381	215495998	4618	DEL	TRUE	3	0	0	0	0
chr1	215858165	215866090	7926	DEL	TRUE	32	0	0	1	0
chr1	216207690	216212365	4676	DEL	TRUE	6	0	0	0	0
chr1	216820577	216821876	1300	DUP	TRUE	1	0	0	0	0
chr1	217395053	217396789	1737	DUP	TRUE	4	0	0	0	0
chr1	217400548	217425479	24932	DUP	TRUE	73	0	0	0	0
chr1	217520805	217522969	2165	DEL	TRUE	7	0	0	0	0
chr1	217998142	218006481	8340	DEL	TRUE	27	0	0	0	0
chr1	217998142	218005191	7050	DEL	TRUE	22	0	0	0	0
chr1	217998142	218000437	2296	DEL	TRUE	8	0	0	0	0
chr1	218036894	218043750	6857	DUP	TRUE	9	0	0	0	0
chr1	218056297	218058933	2637	DUP	TRUE	3	0	0	0	0
chr1	218402663	218407803	5141	DUP	TRUE	11	0	0	0	0
chr1	218417840	218421746	3907	DEL	TRUE	6	0	0	0	0
chr1	218678531	218688313	9783	DEL	TRUE	47	0	0	0	1
chr1	219022426	219030534	8109	DEL	TRUE	7	0	0	0	0
chr1	219663263	219665152	1890	DEL	TRUE	6	0	0	0	0
chr1	220288213	220294507	6295	DEL	TRUE	0	0	0	0	0
chr1	220356344	220368070	11727	DEL	TRUE	1	0	0	0	0
chr1	220434567	220441297	6731	DEL	TRUE	1	0	0	0	1
chr1	220502824	220504188	1365	DEL	TRUE	2	0	1	0	0
chr1	220945928	220949929	4002	DEL	TRUE	4	0	0	0	0
chr1	221113591	221118886	5296	DEL	TRUE	9	0	0	0	0
chr1	221252955	221257212	4258	DUP	TRUE	10	0	0	0	0
chr1	221324271	221328372	4102	DEL	TRUE	4	0	0	0	0
chr1	221742919	221755765	12847	DEL	TRUE	9	0	0	0	0
chr1	222373560	222378854	5295	DEL	TRUE	2	0	2	0	0
chr1	222549361	222551713	2353	DEL	TRUE	8	0	0	0	0
chr1	222983922	222986395	2474	DEL	TRUE	1	0	0	0	0
chr1	223262823	223265670	2848	DEL	TRUE	2	0	0	0	0
chr1	223737250	223741135	3886	DUP	TRUE	3	0	0	0	0
chr1	223962673	223964079	1407	DUP	TRUE	3	0	0	0	0
chr1	224230004	224240060	10057	DUP	TRUE	26	0	0	2	0
chr1	224322880	224334168	11289	DEL	TRUE	41	0	0	0	2
chr1	224815473	224818469	2997	DEL	TRUE	5	0	0	0	0
chr1	225380451	225464931	84481	DUP	TRUE	276	0	0	1	0
chr1	226196669	226200654	3986	DEL	TRUE	7	0	0	0	1
chr1	226361902	226369153	7252	DEL	TRUE	14	0	0	0	0
chr1	226982003	226994870	12868	DEL	TRUE	22	2	0	0	0
chr1	227195335	227196948	1614	DUP	TRUE	8	0	0	0	0
chr1	227443020	227450048	7029	DEL	TRUE	10	0	0	0	0
chr1	227451229	227453433	2205	DEL	TRUE	5	0	0	0	0
chr1	227728042	227729348	1307	DUP	FALSE	3	0	0	0	0
chr1	227760333	227768132	7800	DUP	FALSE	20	0	0	0	0
chr1	228048091	228071191	23101	DUP	TRUE	23	0	0	0	0
chr1	228102876	228124573	21698	DUP	TRUE	62	0	0	0	0
chr1	228435195	228444445	9251	DUP	FALSE	28	0	0	1	0
chr1	229026373	229030491	4119	DEL	TRUE	7	0	0	0	0
chr1	229178299	229189713	11415	DEL	TRUE	43	0	0	0	0
chr1	229233637	229244390	10754	DUP	TRUE	15	0	0	0	0
chr1	229410550	229414041	3492	DEL	TRUE	4	0	0	0	1
chr1	229652885	229654308	1424	DUP	FALSE	0	0	0	0	0
chr1	229812427	229823176	10750	DEL	TRUE	5	0	0	0	0
chr1	229887342	229890764	3423	DEL	TRUE	2	0	0	0	0
chr1	230238801	230244934	6134	DEL	TRUE	26	0	0	0	0
chr1	230257917	230260537	2621	DUP	TRUE	2	0	0	0	0
chr1	230429959	230442165	12207	DEL	TRUE	43	0	0	0	0
chr1	230579921	230590567	10647	DEL	TRUE	15	0	0	0	0
chr1	231318870	231322915	4046	DEL	TRUE	6	0	0	0	0
chr1	231534588	231547246	12659	DEL	TRUE	49	1	0	0	0
chr1	231692418	231696771	4354	DEL	TRUE	5	0	0	0	0
chr1	232393135	232401610	8476	DEL	TRUE	11	0	0	0	0
chr1	232458441	232460743	2303	DUP	FALSE	3	0	0	0	0
chr1	232587158	232588876	1719	DUP	TRUE	2	0	0	0	0
chr1	234316339	234320135	3797	DEL	TRUE	3	0	0	0	0
chr1	234911363	234956952	45590	DUP	FALSE	43	43	0	3	22
chr1	235138462	235141719	3258	DEL	TRUE	2	0	0	0	0
chr1	235509181	235521424	12244	DEL	TRUE	30	0	0	0	0
chr1	235703954	235704667	714	DUP	FALSE	0	0	0	0	0
chr1	235824678	235826578	1901	DUP	TRUE	1	0	0	0	0
chr1	235872431	235874787	2357	DEL	TRUE	2	0	0	0	0
chr1	236929523	236933812	4290	DUP	TRUE	9	0	0	0	0
chr1	237120607	237135786	15180	DUP	TRUE	32	0	0	0	0
chr1	237125988	237130476	4489	DUP	TRUE	10	0	0	0	0
chr1	237273164	237279566	6403	DEL	TRUE	24	0	0	0	0
chr1	237638773	237647037	8265	DEL	TRUE	19	0	0	0	0
chr1	238316057	238319656	3600	DUP	FALSE	6	0	0	0	0
chr1	238365145	238368324	3180	DEL	TRUE	4	0	0	0	0
chr1	238614611	238633200	18590	DEL	TRUE	48	0	0	0	0
chr1	238633200	238654982	21783	DEL	TRUE	77	0	0	0	0
chr1	239549029	239551384	2356	DUP	TRUE	4	0	0	0	0
chr1	240239783	240250083	10301	DEL	TRUE	11	0	0	0	0
chr1	240275824	240283211	7388	DEL	TRUE	10	0	0	0	0
chr1	240392796	240395101	2306	DEL	TRUE	5	0	0	0	0
chr1	240516123	240519061	2939	DEL	TRUE	3	0	0	0	0
chr1	240614229	240618128	3900	DEL	TRUE	16	0	0	0	0
chr1	241042807	241055393	12587	DEL	TRUE	47	0	0	0	0
chr1	241095491	241098559	3069	DEL	TRUE	8	0	0	0	0
chr1	241351749	241371804	20056	DEL	TRUE	61	0	0	1	1
chr1	241426003	241441853	15851	DUP	TRUE	58	0	0	2	0
chr1	241587784	241603349	15566	DEL	TRUE	44	0	0	0	0
chr1	242110841	242118495	7655	DEL	TRUE	60	0	0	1	0
chr1	242121960	242130054	8095	DEL	TRUE	47	0	0	0	0
chr1	242298178	242299623	1446	DEL	TRUE	3	0	0	0	0
chr1	242739778	242834956	95179	DUP	TRUE	253	1	0	1	1
chr1	242837961	242953897	115937	DUP	TRUE	266	2	0	1	3
chr1	242960708	242963825	3118	DUP	TRUE	17	0	0	0	0
chr1	242987421	243039514	52094	DUP	TRUE	150	1	0	2	0
chr1	243152674	243263662	110989	DUP	FALSE	193	3	0	6	18
chr1	243263662	243284891	21230	DUP	FALSE	27	0	0	0	2
chr1	243263662	243266614	2953	DUP	FALSE	4	0	0	0	0
chr1	243285191	243312856	27666	DUP	FALSE	18	0	0	0	1
chr1	244337693	244349278	11586	DEL	TRUE	20	0	0	0	0
chr1	244388121	244392064	3944	DEL	TRUE	8	0	0	0	0
chr1	245062904	245078444	15541	DEL	TRUE	34	0	0	0	0
chr1	245113376	245290462	177087	DUP	TRUE	413	2	0	2	2
chr1	245171752	245189610	17859	DUP	TRUE	31	0	0	0	1
chr1	245292750	245854807	562058	DUP	TRUE	1398	4	0	11	8
chr1	245431245	245443162	11918	DEL	TRUE	46	0	0	0	0
chr1	245636654	245647769	11116	DEL	TRUE	35	0	0	1	0
chr1	245702666	245748997	46332	DUP	TRUE	116	0	0	2	0
chr1	245734075	245735021	947	DUP	TRUE	2	0	0	0	0
chr1	245857111	246004575	147465	DUP	TRUE	420	1	0	1	3
chr1	245932578	245936640	4063	DUP	TRUE	10	0	0	0	0
chr1	246370771	246372223	1453	DUP	TRUE	8	0	0	0	0
chr1	246739134	246743473	4340	DEL	TRUE	6	0	0	0	0
chr1	246994419	247012496	18078	DUP	TRUE	35	0	0	0	0
chr1	247084771	247092802	8032	DEL	TRUE	26	0	0	0	1
chr1	247107324	247123260	15937	DEL	TRUE	42	0	0	0	1
chr1	247200552	247224392	23841	DEL	TRUE	87	0	0	0	0
chr1	247336263	247338660	2398	DUP	TRUE	17	0	0	0	0
chr1	247375332	247393455	18124	DEL	TRUE	42	1	0	1	3
chr1	247653588	247655319	1732	DEL	TRUE	2	0	0	0	0
chr1	247818926	247920122	101197	DUP	TRUE	231	0	0	1	1
chr1	247922247	247972035	49789	DUP	TRUE	250	0	0	1	1
chr1	247976180	248288754	312575	DUP	TRUE	717	11	0	4	2
chr1	247982627	247996517	13891	DEL	TRUE	72	0	0	0	0
chr1	248154467	248157213	2747	DEL	TRUE	1	0	0	0	0
chr1	248154467	248155068	602	DEL	TRUE	0	0	0	0	0
chr1	248246946	248248579	1634	DUP	FALSE	1	0	0	0	0
chr1	248267480	248276437	8958	DEL	TRUE	7	0	0	2	0
chr1	248276437	248288754	12318	DUP	FALSE	5	0	0	0	0
chr1	248582019	248612853	30835	DUP	FALSE	75	26	0	1	16
chr1	248612853	248615662	2810	DUP	TRUE	1	0	0	0	6
chr1	248615662	248622891	7230	DUP	FALSE	2	0	0	0	12
chr1	248629956	248633799	3844	DUP	FALSE	6	0	0	0	3
chr1	248629956	248651295	21340	DUP	FALSE	95	1	0	0	4
chr1	248636428	248720752	84325	DUP	TRUE	171	6	0	0	24
chr1	248651295	248654392	3098	DUP	TRUE	8	0	0	0	0
chr1	248654392	248661514	7123	DUP	FALSE	9	0	0	0	0
chr1	248654392	248675365	20974	DUP	FALSE	27	4	0	0	15
chr1	248668525	248675365	6841	DUP	FALSE	7	4	0	0	9
chr1	248668525	248737761	69237	DUP	FALSE	135	5	0	0	18
chr1	248688315	248720752	32438	DUP	FALSE	49	1	0	0	9
chr1	248709283	248720752	11470	DUP	FALSE	22	0	0	0	0
chr1	248720994	248723811	2818	DUP	FALSE	16	0	0	0	0
chr1	248720994	248795675	74682	DUP	FALSE	71	0	0	0	0
chr1	248720994	248734816	13823	DUP	FALSE	36	0	0	0	0
chr1	248723811	248737761	13951	DUP	FALSE	54	0	0	0	0
chr1	248723811	248734816	11006	DUP	FALSE	20	0	0	0	0
chr1	248745821	248849502	103682	DUP	TRUE	209	7	0	1	15
chr1	248745821	248795675	49855	DUP	FALSE	0	0	0	0	0
chr1	248849502	248850097	596	DEL	TRUE	2	0	0	0	0
chr1	248850097	248908159	58063	DUP	TRUE	147	15	0	2	0
chr1	248862888	248884879	21992	DEL	TRUE	58	0	0	0	0
chr1	248871612	248884879	13268	DEL	TRUE	16	0	0	0	0
chr1	249084301	249096639	12339	DEL	TRUE	7	0	0	0	1
chr2	13678	17536	3859	DUP	FALSE	0	0	0	0	0
chr2	31616	33851	2236	DUP	FALSE	1	0	0	0	0
chr2	31616	34151	2536	DEL	TRUE	1	0	0	0	0
chr2	31616	35833	4218	DEL	TRUE	1	0	0	0	0
chr2	34151	35833	1683	DUP	FALSE	0	0	0	0	0
chr2	139804	140797	994	DEL	TRUE	3	0	0	0	0
chr2	197143	201260	4118	DEL	TRUE	9	0	0	0	6
chr2	406159	408491	2333	DEL	TRUE	6	0	0	0	0
chr2	597472	599025	1554	DUP	TRUE	6	0	0	0	0
chr2	683477	1005851	322375	DUP	TRUE	858	25	0	9	47
chr2	1373340	1375033	1694	DUP	TRUE	5	0	0	0	0
chr2	1859328	1861239	1912	DEL	TRUE	10	0	0	0	0
chr2	2178139	2179743	1605	DEL	TRUE	0	0	0	0	0
chr2	2550670	2554007	3338	DEL	TRUE	7	0	0	0	0
chr2	2885125	2897519	12395	DUP	TRUE	36	0	0	0	0
chr2	3249507	3251454	1948	DUP	TRUE	10	0	0	1	0
chr2	3316069	3324927	8859	DEL	TRUE	26	1	0	1	2
chr2	3735456	3736559	1104	DEL	TRUE	0	0	1	0	0
chr2	4149999	4330442	180444	DEL	TRUE	270	0	0	5	1
chr2	4183843	4187593	3751	DEL	TRUE	14	0	0	0	0
chr2	4335435	4561548	226114	DEL	TRUE	386	6	0	1	4
chr2	4562592	4582928	20337	DEL	TRUE	53	0	0	0	0
chr2	4651525	4654456	2932	DEL	TRUE	9	0	0	1	0
chr2	4667954	4672149	4196	DEL	TRUE	3	0	0	0	0
chr2	4731917	4735391	3475	DUP	TRUE	1	0	0	0	0
chr2	4952034	4957584	5551	DEL	TRUE	23	0	0	0	0
chr2	5238905	5256681	17777	DEL	TRUE	112	0	0	0	0
chr2	5448941	5450879	1939	DEL	TRUE	3	0	0	0	0
chr2	5735836	5737754	1919	DEL	TRUE	0	0	0	0	0
chr2	5821583	5825239	3657	DUP	TRUE	4	0	0	0	0
chr2	6297852	6309661	11810	DEL	TRUE	8	0	0	1	0
chr2	6399958	6402464	2507	DEL	TRUE	8	0	0	0	0
chr2	6590957	6600324	9368	DEL	TRUE	21	0	0	1	1
chr2	7229753	7236478	6726	DEL	TRUE	22	0	0	0	0
chr2	8246935	8252146	5212	DEL	TRUE	8	0	0	0	0
chr2	8566500	8570488	3989	DEL	TRUE	4	0	0	0	0
chr2	9922487	9927478	4992	DEL	TRUE	20	0	0	0	0
chr2	10074117	10078262	4146	DEL	TRUE	26	0	0	0	0
chr2	10268871	10270410	1540	DUP	TRUE	0	0	0	0	0
chr2	10431038	10441845	10808	DEL	TRUE	29	0	0	1	1
chr2	10702010	10707371	5362	DEL	TRUE	17	0	0	0	2
chr2	10882969	10895022	12054	DUP	TRUE	16	0	0	0	0
chr2	11393920	11400897	6978	DEL	TRUE	21	0	0	0	0
chr2	11398505	11400897	2393	DEL	TRUE	10	0	0	0	0
chr2	11474072	11475659	1588	DEL	TRUE	0	0	0	0	0
chr2	11702574	11706851	4278	DUP	TRUE	4	0	0	0	0
chr2	12018320	12028772	10453	DEL	TRUE	28	8	0	1	4
chr2	12864976	12866276	1301	DUP	TRUE	3	0	0	0	0
chr2	13199894	13284265	84372	DUP	TRUE	9	0	0	1	0
chr2	13710963	13716701	5739	DEL	TRUE	9	0	0	0	1
chr2	14111113	14114429	3317	DEL	TRUE	1	0	0	0	0
chr2	14452319	14455454	3136	DEL	TRUE	4	0	0	0	0
chr2	14678752	14693218	14467	DEL	TRUE	42	0	0	0	0
chr2	14702886	14710362	7477	DEL	TRUE	4	0	4	0	0
chr2	14828843	14833111	4269	DEL	TRUE	5	0	0	1	0
chr2	14852727	14855556	2830	DEL	TRUE	4	0	0	0	0
chr2	14965545	14971366	5822	DEL	TRUE	13	0	0	0	0
chr2	15159103	15198842	39740	DEL	TRUE	191	0	0	0	0
chr2	15180907	15182088	1182	DEL	TRUE	8	0	0	0	0
chr2	15284447	15291015	6569	DEL	TRUE	14	0	0	0	0
chr2	16249327	16255778	6452	DEL	TRUE	16	0	0	1	0
chr2	16559907	16564717	4811	DEL	TRUE	6	0	0	0	0
chr2	17023531	17041860	18330	DUP	TRUE	11	0	0	0	0
chr2	17645187	17654208	9022	DEL	TRUE	17	0	0	0	0
chr2	18117725	18121495	3771	DEL	TRUE	11	0	0	0	1
chr2	18784530	18786797	2268	DEL	TRUE	0	0	0	0	0
chr2	19002334	19004770	2437	DEL	TRUE	4	0	0	0	0
chr2	19407908	19412920	5013	DEL	TRUE	11	0	0	0	0
chr2	19576245	19590771	14527	DEL	TRUE	16	0	0	0	0
chr2	19767194	19771126	3933	DEL	TRUE	11	0	0	0	0
chr2	19958566	19962383	3818	DEL	TRUE	12	0	0	0	0
chr2	21821568	21858326	36759	DEL	TRUE	61	0	0	3	0
chr2	22204466	22234431	29966	DEL	TRUE	11	0	0	0	0
chr2	22319420	22332602	13183	DEL	TRUE	5	0	0	0	8
chr2	22494519	22496549	2031	DEL	TRUE	2	0	0	0	0
chr2	22498242	22499857	1616	DUP	TRUE	4	0	0	0	0
chr2	22687705	22690524	2820	DEL	TRUE	4	0	2	0	0
chr2	23466330	23482747	16418	DEL	TRUE	25	0	0	0	0
chr2	23696372	23700260	3889	DEL	TRUE	1	0	0	0	0
chr2	24213255	24220194	6940	DEL	TRUE	14	0	0	0	0
chr2	24413403	24424882	11480	DEL	TRUE	31	0	0	0	1
chr2	24598828	24617582	18755	DEL	TRUE	25	0	0	0	0
chr2	25306442	25313661	7220	DEL	TRUE	13	0	0	0	0
chr2	25794666	25798459	3794	DEL	TRUE	1	0	0	0	0
chr2	26046920	26057437	10518	DEL	TRUE	16	0	0	0	0
chr2	26312585	26316420	3836	DEL	TRUE	9	0	0	0	1
chr2	26753307	26772399	19093	DUP	TRUE	62	0	0	1	0
chr2	26994403	26997316	2914	DEL	TRUE	5	0	0	0	0
chr2	27591193	27593318	2126	DUP	TRUE	2	0	0	0	0
chr2	27993814	27995505	1692	DUP	TRUE	0	0	0	0	0
chr2	28229261	28237022	7762	DEL	TRUE	8	0	0	0	0
chr2	28585696	28592722	7027	DEL	TRUE	32	0	0	0	0
chr2	29096678	29108315	11638	DEL	TRUE	22	0	0	0	1
chr2	29641201	29645728	4528	DEL	TRUE	11	0	0	0	0
chr2	30545899	30549619	3721	DEL	TRUE	8	0	0	0	0
chr2	30682971	30695090	12120	DEL	TRUE	15	0	0	0	1
chr2	31123797	31126772	2976	DEL	TRUE	3	0	0	0	0
chr2	32738045	32899566	161522	DUP	TRUE	194	1	0	3	0
chr2	32777386	32783543	6158	DEL	TRUE	7	0	0	0	0
chr2	32801523	32804643	3121	DUP	TRUE	4	0	0	0	0
chr2	33221706	33227491	5786	DEL	TRUE	9	0	1	0	0
chr2	33700917	33703049	2133	DUP	TRUE	10	0	0	0	0
chr2	33764749	33769039	4291	DEL	TRUE	10	0	0	0	0
chr2	34635839	34638035	2197	DEL	TRUE	5	0	0	0	0
chr2	34690390	34736880	46491	DEL	TRUE	16	0	59	0	1
chr2	34860264	34881630	21367	DEL	TRUE	64	0	0	0	0
chr2	34965212	34967293	2082	DEL	TRUE	4	0	0	0	0
chr2	34988707	34993133	4427	DEL	TRUE	2	0	0	0	0
chr2	35059315	35068887	9573	DEL	TRUE	6	0	0	0	0
chr2	35328748	35347364	18617	DEL	TRUE	72	0	0	0	0
chr2	35580008	35621729	41722	DEL	TRUE	98	0	0	1	1
chr2	35828877	35832653	3777	DEL	TRUE	11	0	0	0	0
chr2	36332130	36347046	14917	DUP	FALSE	7	1	0	0	0
chr2	36835881	36840365	4485	DEL	TRUE	9	0	0	0	0
chr2	37109043	37245589	136547	DUP	FALSE	55	3	0	0	5
chr2	37146002	37146102	101	DUP	FALSE	0	0	0	0	0
chr2	37146102	37158452	12351	DUP	FALSE	2	1	0	0	1
chr2	37686080	37687403	1324	DEL	TRUE	4	0	0	0	0
chr2	37695155	37699958	4804	DEL	TRUE	6	0	0	0	1
chr2	38943510	38949575	6066	DUP	FALSE	15	0	0	0	1
chr2	38954514	38972024	17511	DUP	TRUE	50	0	0	0	1
chr2	39768792	39772003	3212	DEL	TRUE	5	0	0	0	0
chr2	40141688	40225752	84065	DEL	TRUE	246	0	0	1	0
chr2	40198304	40206883	8580	DEL	TRUE	26	0	0	0	0
chr2	40292756	40325538	32783	DEL	TRUE	71	0	0	0	1
chr2	40612281	40615358	3078	DEL	TRUE	22	0	0	0	0
chr2	40718104	40726765	8662	DEL	TRUE	10	1	0	0	0
chr2	40765018	40773069	8052	DEL	TRUE	7	0	0	0	0
chr2	40925526	40950297	24772	DEL	TRUE	70	0	0	0	0
chr2	41234290	41251298	17009	DEL	TRUE	43	0	0	0	0
chr2	41369396	41380656	11261	DEL	TRUE	22	0	0	0	0
chr2	41775791	41786813	11023	DEL	TRUE	14	0	1	0	0
chr2	41921662	41924169	2508	DEL	TRUE	2	0	0	0	0
chr2	41999859	42077451	77593	DEL	TRUE	256	0	0	1	0
chr2	42005596	42010012	4417	DEL	TRUE	11	0	0	0	0
chr2	42077751	42234795	157045	DEL	TRUE	518	2	0	5	2
chr2	42723578	42759316	35739	DEL	TRUE	90	1	0	0	3
chr2	42739370	42747630	8261	DEL	TRUE	25	0	0	0	1
chr2	43301844	43303585	1742	DEL	TRUE	1	0	0	0	0
chr2	43424802	43428333	3532	DEL	TRUE	12	0	0	0	0
chr2	43522974	43539672	16699	DEL	TRUE	38	0	0	4	2
chr2	43885454	43903050	17597	DEL	TRUE	15	1	0	0	0
chr2	43985887	43989446	3560	DEL	TRUE	4	0	0	0	1
chr2	44216786	44222027	5242	DEL	TRUE	20	0	0	0	0
chr2	44318387	44321114	2728	DEL	TRUE	8	0	0	0	0
chr2	44367022	44373537	6516	DEL	TRUE	19	0	0	0	0
chr2	44383479	44384997	1519	DEL	TRUE	7	0	0	0	0
chr2	44464934	44470334	5401	DEL	TRUE	17	0	0	0	1
chr2	44502681	44566442	63762	DUP	TRUE	113	1	0	1	0
chr2	44824305	44831286	6982	DEL	TRUE	19	0	0	0	0
chr2	44831286	44837040	5755	DEL	TRUE	16	0	0	0	0
chr2	45035857	45040437	4581	DEL	TRUE	8	0	0	0	0
chr2	45302733	45336278	33546	DEL	TRUE	56	0	0	3	0
chr2	45724483	45737515	13033	DEL	TRUE	16	0	0	0	0
chr2	45757909	45760260	2352	DEL	TRUE	2	0	0	0	0
chr2	46438738	46458562	19825	DEL	TRUE	79	0	0	0	0
chr2	46693679	46698712	5034	DEL	TRUE	8	0	0	0	0
chr2	46893564	46897965	4402	DEL	TRUE	17	0	0	0	0
chr2	46894680	46895878	1199	DEL	TRUE	6	0	0	0	0
chr2	47082833	47085992	3160	DEL	TRUE	10	0	0	1	0
chr2	47504890	47514264	9375	DEL	TRUE	17	1	0	0	0
chr2	47879902	47882568	2667	DEL	TRUE	2	0	0	0	0
chr2	48230043	48235861	5819	DEL	TRUE	12	0	0	0	0
chr2	48778824	48787915	9092	DUP	TRUE	17	0	0	1	4
chr2	49280987	49329497	48511	DEL	TRUE	161	1	0	3	2
chr2	49524498	49545460	20963	DEL	TRUE	40	0	0	0	0
chr2	49533483	49545460	11978	DEL	TRUE	20	0	0	0	0
chr2	49920573	49937645	17073	DEL	TRUE	26	0	0	0	0
chr2	50496891	50515031	18141	DEL	TRUE	60	0	0	0	0
chr2	50766149	50769637	3489	DUP	TRUE	0	0	0	0	0
chr2	51008673	51016458	7786	DEL	TRUE	11	0	0	0	0
chr2	51157734	51160085	2352	DUP	TRUE	2	0	0	0	0
chr2	51183085	51187387	4303	DEL	TRUE	9	0	0	0	0
chr2	51223391	51225715	2325	DEL	TRUE	4	0	0	0	0
chr2	51280423	51486442	206020	DEL	TRUE	393	0	0	6	0
chr2	51365617	51486442	120826	DEL	TRUE	263	0	0	3	0
chr2	51515603	51525498	9896	DEL	TRUE	40	0	0	0	0
chr2	51926367	51928014	1648	DEL	TRUE	1	0	0	0	0
chr2	52075711	52089532	13822	DEL	TRUE	36	0	0	0	0
chr2	52377445	52383483	6039	DEL	TRUE	18	0	0	0	0
chr2	52749525	52785835	36311	DEL	TRUE	0	0	0	0	1
chr2	52976814	53001890	25077	DEL	TRUE	74	0	0	0	0
chr2	53248280	53254102	5823	DEL	TRUE	6	0	0	0	0
chr2	53370429	53377254	6826	DEL	TRUE	22	0	0	0	0
chr2	53751480	53757719	6240	DEL	TRUE	9	0	0	0	0
chr2	53843153	53847648	4496	DEL	TRUE	5	0	0	0	0
chr2	54011259	54014920	3662	DUP	TRUE	7	0	0	0	0
chr2	54511601	54517713	6113	DEL	TRUE	9	0	0	0	0
chr2	54564948	54567711	2764	DEL	TRUE	2	0	0	0	0
chr2	55100155	55101616	1462	DUP	TRUE	2	0	0	0	0
chr2	55452525	55458770	6246	DUP	TRUE	17	0	0	0	0
chr2	55907001	55941458	34458	DUP	TRUE	107	1	0	4	0
chr2	55922578	55955705	33128	DUP	TRUE	99	0	0	2	0
chr2	56070683	56072128	1446	DEL	TRUE	4	0	0	0	0
chr2	56281635	56395107	113473	DUP	TRUE	280	8	0	2	0
chr2	56318745	56328868	10124	DEL	TRUE	21	0	0	0	0
chr2	56631052	56646720	15669	DUP	TRUE	29	0	0	0	0
chr2	56646720	56656287	9568	DEL	TRUE	14	0	1	0	0
chr2	56656287	56671430	15144	DUP	TRUE	41	0	0	0	0
chr2	57107962	57110177	2216	DUP	TRUE	4	0	0	0	0
chr2	57138741	57153998	15258	DEL	TRUE	11	0	0	0	0
chr2	57297589	57305243	7655	DUP	TRUE	21	1	0	0	0
chr2	57307144	57332235	25092	DUP	TRUE	39	0	0	0	0
chr2	57332832	57352344	19513	DUP	TRUE	35	0	0	0	0
chr2	57332832	57334953	2122	DEL	TRUE	2	0	0	0	0
chr2	57398320	57451617	53298	DUP	TRUE	173	4	0	0	2
chr2	57573576	57582267	8692	DEL	TRUE	19	0	0	1	0
chr2	57805836	57832196	26361	DEL	TRUE	90	0	0	3	1
chr2	58201547	58210897	9351	DEL	TRUE	22	0	0	0	0
chr2	58394896	58455395	60500	DUP	TRUE	99	1	0	0	2
chr2	58457072	58482821	25750	DUP	TRUE	43	0	0	0	2
chr2	58951765	58958515	6751	DEL	TRUE	1	0	0	1	0
chr2	59340790	59343881	3092	DEL	TRUE	8	0	0	0	0
chr2	59622960	59642799	19840	DEL	TRUE	13	0	11	0	1
chr2	59816873	59821074	4202	DEL	TRUE	18	0	0	1	0
chr2	59900659	59908169	7511	DEL	TRUE	9	0	0	0	0
chr2	59948021	59954383	6363	DEL	TRUE	13	0	0	0	0
chr2	60925147	60943286	18140	DUP	TRUE	12	0	0	1	0
chr2	62349965	62352486	2522	DEL	TRUE	2	0	0	0	0
chr2	62609509	62615358	5850	DEL	TRUE	4	0	0	0	1
chr2	62734917	62759917	25001	DEL	TRUE	65	0	0	0	0
chr2	63732857	63752855	19999	DEL	TRUE	22	0	0	1	0
chr2	64058995	64063353	4359	DEL	TRUE	4	0	0	0	0
chr2	64693368	64705651	12284	DEL	TRUE	24	0	0	0	0
chr2	64703639	64722147	18509	DUP	TRUE	45	0	0	0	0
chr2	64747737	64750804	3068	DEL	TRUE	6	0	0	0	0
chr2	64907536	64914637	7102	DEL	TRUE	13	1	0	0	0
chr2	65461883	65466974	5092	DUP	TRUE	11	0	0	0	0
chr2	65510618	65518659	8042	DEL	TRUE	19	0	0	1	0
chr2	65616738	65622955	6218	DUP	TRUE	10	0	0	0	1
chr2	65907847	65917244	9398	DUP	TRUE	11	0	0	0	0
chr2	66008368	66009908	1541	DEL	TRUE	7	0	0	0	0
chr2	66031583	66039095	7513	DEL	TRUE	8	0	0	0	0
chr2	66150872	66160476	9605	DEL	TRUE	4	0	0	0	2
chr2	66179331	66197447	18117	DEL	TRUE	1	0	0	0	0
chr2	66505435	66507414	1980	DEL	TRUE	0	0	0	0	0
chr2	66782803	66785772	2970	DUP	TRUE	4	0	0	0	0
chr2	67271290	67332323	61034	DEL	TRUE	121	0	0	1	1
chr2	67288880	67290177	1298	DEL	TRUE	1	0	0	0	0
chr2	67323825	67332323	8499	DEL	TRUE	17	0	0	0	0
chr2	67753651	67775140	21490	DEL	TRUE	45	0	0	0	0
chr2	68184738	68192894	8157	DEL	TRUE	21	0	0	0	0
chr2	69065421	69080370	14950	DEL	TRUE	27	0	0	0	0
chr2	69215562	69219217	3656	DEL	TRUE	0	0	0	0	0
chr2	69706007	69708407	2401	DEL	TRUE	2	0	0	0	0
chr2	69712264	69725946	13683	DEL	TRUE	11	1	0	0	0
chr2	69940112	69944271	4160	DUP	TRUE	8	0	0	0	0
chr2	70312510	70313480	971	DEL	TRUE	0	0	0	0	0
chr2	70313480	70315364	1885	DUP	TRUE	0	1	0	0	1
chr2	70988257	70993145	4889	DEL	TRUE	8	0	0	0	0
chr2	71040352	71057627	17276	DEL	TRUE	119	0	0	0	0
chr2	71163739	71165875	2137	DEL	TRUE	4	0	0	0	0
chr2	71338443	71348788	10346	DEL	TRUE	32	0	0	0	0
chr2	71338443	71345117	6675	DEL	TRUE	21	0	0	0	0
chr2	71342101	71348788	6688	DEL	TRUE	20	0	0	0	0
chr2	71471595	71495963	24369	DEL	TRUE	41	0	0	0	0
chr2	71654049	71658161	4113	DUP	TRUE	5	0	0	0	0
chr2	73568185	73582982	14798	DEL	TRUE	19	0	0	1	0
chr2	73786203	73897982	111780	DUP	TRUE	280	21	0	2	7
chr2	73825674	73834611	8938	DUP	TRUE	21	0	0	0	0
chr2	73844221	73871945	27725	DUP	FALSE	107	1	0	1	0
chr2	73851126	73905962	54837	DUP	TRUE	167	1	0	1	4
chr2	73876299	73900546	24248	DUP	TRUE	59	0	0	1	4
chr2	73901964	73906462	4499	DUP	FALSE	7	0	0	0	0
chr2	73906462	73931688	25227	DUP	FALSE	72	0	0	0	3
chr2	73906654	73911886	5233	DUP	FALSE	13	0	0	0	0
chr2	73906654	73908048	1395	DUP	FALSE	5	0	0	0	0
chr2	73916487	73931688	15202	DUP	FALSE	45	0	0	0	3
chr2	74806487	74810848	4362	DUP	TRUE	1	0	0	0	0
chr2	75143020	75182590	39571	DUP	TRUE	79	1	0	2	1
chr2	75401083	75410508	9426	DEL	TRUE	14	0	0	0	0
chr2	76232110	76236673	4564	DEL	TRUE	8	0	0	1	0
chr2	76334187	76338968	4782	DEL	TRUE	13	0	0	0	0
chr2	76410281	76414601	4321	DEL	TRUE	6	0	0	1	0
chr2	76416653	76418999	2347	DEL	TRUE	3	0	0	0	0
chr2	76740088	76747037	6950	DUP	TRUE	43	0	0	1	0
chr2	76772939	76776169	3231	DEL	TRUE	4	0	0	0	0
chr2	76929022	76957038	28017	DEL	TRUE	136	0	0	1	4
chr2	77892788	77900965	8178	DUP	FALSE	1	0	0	0	0
chr2	77973577	78002468	28892	DUP	TRUE	91	0	0	3	1
chr2	78394469	78484558	90090	DEL	TRUE	174	0	0	3	1
chr2	78689478	78694442	4965	DEL	TRUE	12	0	0	0	0
chr2	78700724	78734805	34082	DEL	TRUE	131	0	0	1	0
chr2	78862270	78866806	4537	DEL	TRUE	8	0	0	0	0
chr2	78976496	78979040	2545	DEL	TRUE	6	0	0	0	0
chr2	79075242	79082527	7286	DEL	TRUE	2	0	0	0	0
chr2	79252693	79254298	1606	DUP	TRUE	6	0	0	0	0
chr2	79329217	79342460	13244	DUP	TRUE	37	0	0	0	1
chr2	79360777	79384144	23368	DEL	TRUE	21	0	0	1	0
chr2	79738845	79741319	2475	DUP	TRUE	1	0	0	1	0
chr2	79749688	79761608	11921	DEL	TRUE	31	1	0	0	0
chr2	81430197	81439436	9240	DEL	TRUE	37	0	0	0	0
chr2	81759060	81764394	5335	DEL	TRUE	11	0	0	0	0
chr2	81812089	81817771	5683	DEL	TRUE	7	0	0	1	0
chr2	82499645	82506938	7294	DEL	TRUE	12	0	0	0	0
chr2	82542419	82551094	8676	DEL	TRUE	17	0	1	0	2
chr2	83129669	83134790	5122	DEL	TRUE	6	0	0	0	0
chr2	83138723	83236430	97708	DEL	TRUE	190	3	0	2	0
chr2	83278645	83291460	12816	DEL	TRUE	79	0	0	0	0
chr2	83494061	83502422	8362	DUP	TRUE	16	0	0	0	0
chr2	83504439	83505473	1035	DUP	TRUE	1	0	0	0	0
chr2	84352140	84354318	2179	DUP	TRUE	5	0	0	0	0
chr2	85119202	85141114	21913	DEL	TRUE	5	2	0	0	0
chr2	85940939	85945422	4484	DEL	TRUE	7	0	0	0	0
chr2	86205868	86215032	9165	DEL	TRUE	25	0	0	0	0
chr2	86409235	86417421	8187	DUP	TRUE	21	0	0	0	0
chr2	86498790	86505954	7165	DEL	TRUE	12	0	0	0	0
chr2	87345038	87388849	43812	DUP	FALSE	48	0	0	0	4
chr2	87345038	87559754	214717	DUP	FALSE	387	17	0	2	28
chr2	87388849	87398702	9854	DUP	FALSE	8	0	0	0	3
chr2	87398702	87398902	201	DUP	FALSE	0	0	0	0	0
chr2	87409723	87488867	79145	DUP	FALSE	148	4	0	2	9
chr2	87416989	87420544	3556	DUP	FALSE	6	0	0	0	1
chr2	87447041	87616666	169626	DUP	FALSE	274	221	0	4	72
chr2	87488601	87490742	2142	DUP	FALSE	14	0	0	0	0
chr2	87514364	87516906	2543	DUP	FALSE	7	0	0	0	0
chr2	87547352	87549045	1694	DUP	FALSE	0	0	0	0	1
chr2	87559754	87621997	62244	DUP	FALSE	30	226	0	2	57
chr2	87559754	87637304	77551	DUP	FALSE	44	285	0	4	68
chr2	87572228	87621997	49770	DUP	FALSE	22	189	0	2	54
chr2	87572228	87616909	44682	DUP	FALSE	22	173	0	2	50
chr2	87572228	87637304	65077	DUP	FALSE	36	248	0	4	65
chr2	87616909	87621997	5089	DUP	FALSE	0	16	0	0	4
chr2	87616909	87637304	20396	DUP	FALSE	14	75	0	2	15
chr2	87616909	87666547	49639	DUP	FALSE	22	141	0	5	57
chr2	87637304	87642408	5105	DUP	FALSE	1	11	0	1	8
chr2	87639856	87666547	26692	DUP	FALSE	7	64	0	3	39
chr2	87731135	87752862	21728	DUP	FALSE	23	1	0	0	0
chr2	87754240	87755640	1401	DUP	FALSE	4	0	0	0	0
chr2	87755640	87815887	60248	DUP	FALSE	59	3	0	3	6
chr2	87762176	87769166	6991	DUP	FALSE	16	1	0	0	5
chr2	87769166	87770212	1047	DUP	FALSE	1	0	0	0	0
chr2	87782788	87784332	1545	DUP	FALSE	0	0	0	0	0
chr2	87784332	87787335	3004	DUP	FALSE	1	0	0	0	0
chr2	87794450	87796390	1941	DUP	FALSE	1	0	0	0	0
chr2	87813770	87814116	347	DUP	FALSE	0	0	0	0	0
chr2	87816900	87875143	58244	DUP	FALSE	134	2	0	1	11
chr2	87818113	87819056	944	DUP	FALSE	1	0	0	0	0
chr2	87821047	87822886	1840	DUP	FALSE	9	0	0	0	0
chr2	87881651	87883330	1680	DUP	FALSE	3	0	0	0	0
chr2	87883330	87884509	1180	DUP	FALSE	1	0	0	0	0
chr2	87896859	87901954	5096	DUP	FALSE	20	0	0	0	1
chr2	87929034	87932824	3791	DUP	FALSE	6	0	0	0	0
chr2	87929034	87944383	15350	DUP	FALSE	39	1	0	1	3
chr2	87944383	87947019	2637	DUP	FALSE	2	0	0	1	0
chr2	87948312	87949655	1344	DUP	FALSE	1	0	0	0	0
chr2	87957666	87961691	4026	DUP	FALSE	11	0	0	0	1
chr2	87961691	87968462	6772	DUP	FALSE	12	1	0	0	7
chr2	87978505	87983182	4678	DUP	FALSE	0	2	0	0	0
chr2	87983182	87983382	201	DUP	FALSE	0	0	0	0	0
chr2	87983382	87985666	2285	DUP	FALSE	0	0	0	0	0
chr2	87983382	87987329	3948	DUP	FALSE	1	0	0	0	0
chr2	87987329	88041837	54509	DUP	FALSE	15	0	0	1	4
chr2	88042133	88261844	219712	DUP	FALSE	157	12	0	4	75
chr2	88121544	88127547	6004	DUP	FALSE	8	0	0	0	1
chr2	88276542	88288709	12168	DUP	FALSE	29	1	0	0	4
chr2	88596181	88610652	14472	DUP	FALSE	32	0	0	0	0
chr2	88825092	88836976	11885	DUP	TRUE	20	0	0	0	1
chr2	89131970	89159415	27446	DEL	TRUE	15	0	0	3	0
chr2	89131970	89457515	325546	DUP	FALSE	261	1	0	149	82
chr2	89131970	89544362	412393	DUP	FALSE	273	1	0	150	84
chr2	89159415	89457515	298101	DUP	TRUE	246	1	0	146	82
chr2	89159615	89457515	297901	DUP	FALSE	246	1	0	143	81
chr2	89159815	89544362	384548	DUP	FALSE	258	1	0	143	83
chr2	89159815	89457515	297701	DUP	FALSE	246	1	0	142	81
chr2	89363904	89618932	255029	DUP	FALSE	67	2	0	36	13
chr2	89457515	89544362	86848	DUP	FALSE	12	0	0	1	2
chr2	89567993	89597605	29613	DUP	FALSE	13	0	0	2	0
chr2	89568478	89618932	50455	DUP	FALSE	16	0	0	0	0
chr2	89569829	89597300	27472	DUP	TRUE	11	0	0	0	0
chr2	89572806	89597605	24800	DUP	FALSE	9	0	0	0	0
chr2	89596948	89597605	658	DUP	FALSE	0	0	0	0	0
chr2	89618932	89619932	1001	DUP	FALSE	0	0	0	0	0
chr2	89619932	89620432	501	DUP	FALSE	0	0	0	0	0
chr2	89620032	89620432	401	DUP	FALSE	0	0	0	0	0
chr2	89620432	89624950	4519	DUP	FALSE	4	1	0	0	0
chr2	89624950	89625200	251	DUP	FALSE	0	0	0	0	0
chr2	89625200	89629967	4768	DUP	FALSE	5	1	0	0	0
chr2	89880562	89880875	314	DUP	FALSE	0	1	0	0	0
chr2	89880875	89882991	2117	DUP	FALSE	2	4	0	0	0
chr2	89882991	89900732	17742	DUP	FALSE	13	7	0	0	0
chr2	89891147	89891347	201	DUP	FALSE	0	0	0	0	0
chr2	89892913	89896790	3878	DUP	FALSE	4	4	0	0	0
chr2	89900732	89910144	9413	DUP	FALSE	2	0	0	0	0
chr2	89900732	89915763	15032	DUP	FALSE	3	0	0	0	0
chr2	89900732	89902587	1856	DUP	FALSE	0	0	0	0	0
chr2	89900732	89907046	6315	DUP	FALSE	1	0	0	0	0
chr2	89900732	89913243	12512	DUP	FALSE	3	0	0	0	0
chr2	89902587	89915763	13177	DUP	FALSE	3	0	0	0	0
chr2	89902587	89907046	4460	DUP	FALSE	1	0	0	0	0
chr2	89907046	89913243	6198	DUP	TRUE	2	0	0	0	0
chr2	89917022	89949782	32761	DUP	FALSE	8	2	0	0	0
chr2	89917022	89923813	6792	DUP	FALSE	3	0	0	0	0
chr2	89920417	89945072	24656	DUP	FALSE	5	2	0	0	0
chr2	89923813	89945572	21760	DUP	FALSE	4	2	0	0	0
chr2	89923813	89949782	25970	DUP	FALSE	5	2	0	0	0
chr2	89923813	89945072	21260	DUP	FALSE	4	2	0	0	0
chr2	89945572	89945760	189	DUP	TRUE	0	0	0	0	0
chr2	89945760	89949782	4023	DUP	FALSE	1	0	0	0	0
chr2	89953882	89957603	3722	DUP	FALSE	3	0	0	0	1
chr2	89953882	90097208	143327	DUP	FALSE	65	1	0	3	4
chr2	89953882	89976414	22533	DUP	FALSE	9	1	0	0	1
chr2	89955742	89976414	20673	DUP	FALSE	9	1	0	0	1
chr2	89957603	89964977	7375	DUP	FALSE	3	0	0	0	0
chr2	89958654	89969920	11267	DUP	FALSE	4	0	0	0	0
chr2	89959429	89972201	12773	DUP	FALSE	3	1	0	0	0
chr2	89961290	89970865	9576	DUP	FALSE	2	1	0	0	0
chr2	89963427	89967988	4562	DUP	FALSE	1	0	0	0	0
chr2	89964202	89976414	12213	DUP	FALSE	3	1	0	0	0
chr2	89964977	89967988	3012	DUP	FALSE	1	0	0	0	0
chr2	89964977	89976414	11438	DUP	FALSE	3	1	0	0	0
chr2	89964977	89968501	3525	DUP	FALSE	1	0	0	0	0
chr2	89967988	89968501	514	DUP	FALSE	0	0	0	0	0
chr2	89967988	89976414	8427	DUP	FALSE	2	1	0	0	0
chr2	89968501	89973742	5242	DUP	FALSE	2	1	0	0	0
chr2	89968501	89976414	7914	DUP	FALSE	2	1	0	0	0
chr2	89973742	89976414	2673	DUP	FALSE	0	0	0	0	0
chr2	89976414	89988834	12421	DUP	FALSE	4	0	0	0	0
chr2	89988834	90320902	332069	DUP	FALSE	244	5	0	6	31
chr2	89989801	90097208	107408	DUP	FALSE	50	0	0	3	3
chr2	90097208	90113518	16311	DUP	FALSE	10	0	0	0	0
chr2	90097208	90320902	223695	DUP	FALSE	192	5	0	3	28
chr2	90113518	90286866	173349	DUP	FALSE	171	0	0	3	26
chr2	90113518	90320902	207385	DUP	FALSE	182	5	0	3	28
chr2	90113518	90243282	129765	DUP	FALSE	135	0	0	3	9
chr2	90113518	90237769	124252	DUP	FALSE	125	0	0	3	9
chr2	90237769	90243282	5514	DUP	FALSE	10	0	0	0	0
chr2	90243282	90320902	77621	DUP	FALSE	47	5	0	0	19
chr2	90243282	90286866	43585	DUP	FALSE	36	0	0	0	17
chr2	90286866	90320902	34037	DUP	FALSE	11	5	0	0	2
chr2	90394690	90459133	64444	DUP	FALSE	65	289	0	9	82
chr2	90459133	90541269	82137	DUP	FALSE	42	198	0	5	45
chr2	90472935	90528365	55431	DUP	FALSE	18	128	0	4	32
chr2	90472935	90487300	14366	DUP	FALSE	14	103	0	4	26
chr2	90487300	90528365	41066	DUP	FALSE	4	25	0	0	6
chr2	90536493	90541269	4777	DUP	FALSE	0	0	0	0	1
chr2	91616125	91679814	63690	DUP	FALSE	62	240	0	3	75
chr2	91616125	91686153	70029	DUP	FALSE	73	270	0	3	79
chr2	91616125	91752272	136148	DUP	FALSE	136	548	0	8	127
chr2	91679814	91686153	6340	DUP	FALSE	11	30	0	0	4
chr2	91679814	91913823	234010	DUP	FALSE	172	1340	0	18	137
chr2	91686153	91708687	22535	DUP	FALSE	38	129	0	3	29
chr2	91686153	91752272	66120	DUP	FALSE	63	278	0	5	48
chr2	91708687	91752272	43586	DUP	FALSE	25	149	0	2	19
chr2	91961189	92027039	65851	DUP	FALSE	14	151	0	0	10
chr2	95561876	95565723	3848	DUP	FALSE	1	0	0	0	1
chr2	95727989	95735374	7386	DEL	TRUE	13	0	0	0	1
chr2	95996319	96009121	12803	DEL	TRUE	10	0	0	0	0
chr2	96104113	96106115	2003	DUP	FALSE	3	0	0	0	0
chr2	96104113	96107215	3103	DUP	FALSE	9	0	0	0	0
chr2	96107429	96126288	18860	DUP	FALSE	16	0	0	0	0
chr2	96129215	96143027	13813	DUP	FALSE	11	0	0	0	0
chr2	96141875	96143027	1153	DUP	FALSE	0	0	0	0	0
chr2	96145911	96162887	16977	DUP	FALSE	17	0	0	0	1
chr2	96246927	96262484	15558	DUP	FALSE	10	0	0	0	0
chr2	96262484	96264782	2299	DUP	FALSE	4	0	0	0	0
chr2	96265414	96266125	712	DUP	FALSE	1	0	0	0	0
chr2	96266608	96301014	34407	DUP	FALSE	30	2	0	0	0
chr2	96302214	96302909	696	DUP	FALSE	1	0	0	0	0
chr2	96303574	96304602	1029	DUP	FALSE	1	0	0	0	0
chr2	96332048	96336896	4849	DUP	TRUE	1	0	0	0	0
chr2	96729554	96729754	201	DUP	FALSE	0	1	0	0	0
chr2	97318347	97327631	9285	DUP	TRUE	3	0	0	1	0
chr2	97407781	97417115	9335	DEL	TRUE	4	0	0	0	0
chr2	97419339	97425184	5846	DEL	TRUE	4	0	0	0	0
chr2	97690483	97693372	2890	DUP	FALSE	2	0	0	0	0
chr2	97699364	97764903	65540	DUP	FALSE	97	61	0	1	4
chr2	97764903	97779149	14247	DUP	FALSE	13	0	0	0	0
chr2	97783626	97848021	64396	DUP	FALSE	65	438	0	3	27
chr2	97788872	97848021	59150	DUP	FALSE	60	438	0	3	27
chr2	97788872	97849921	61050	DUP	FALSE	64	438	0	3	27
chr2	97849921	97883738	33818	DUP	FALSE	50	61	0	0	8
chr2	97849921	97892466	42546	DUP	FALSE	52	63	0	0	8
chr2	97849921	97899292	49372	DUP	FALSE	54	69	0	1	8
chr2	97866829	97899292	32464	DUP	FALSE	26	21	0	1	5
chr2	97883738	97892466	8729	DUP	FALSE	2	2	0	0	0
chr2	97883738	97899292	15555	DUP	FALSE	4	8	0	1	0
chr2	97883738	97907042	23305	DUP	FALSE	4	9	0	1	2
chr2	97892466	97899292	6827	DUP	FALSE	2	6	0	1	0
chr2	97907042	97917020	9979	DUP	FALSE	1	95	0	1	11
chr2	97907042	97919131	12090	DUP	FALSE	1	95	0	1	11
chr2	97907042	97918616	11575	DUP	FALSE	1	95	0	1	11
chr2	97907042	97919931	12890	DUP	FALSE	1	95	0	1	11
chr2	97907042	97918075	11034	DUP	FALSE	1	95	0	1	11
chr2	97949719	98018869	69151	DUP	FALSE	17	11	0	0	3
chr2	97970255	98001706	31452	DUP	FALSE	8	3	0	0	3
chr2	98019131	98120303	101173	DUP	FALSE	34	4	0	0	2
chr2	98020121	98066188	46068	DUP	FALSE	22	2	0	0	1
chr2	98070734	98120003	49270	DUP	FALSE	10	1	0	0	1
chr2	98078538	98084094	5557	DUP	FALSE	2	1	0	0	0
chr2	98089588	98135859	46272	DUP	FALSE	8	51	0	2	7
chr2	98089588	98120153	30566	DUP	FALSE	7	0	0	0	1
chr2	98089588	98120003	30416	DUP	FALSE	7	0	0	0	1
chr2	98089588	98120303	30716	DUP	FALSE	7	0	0	0	1
chr2	98120003	98120303	301	DUP	FALSE	0	0	0	0	0
chr2	98120303	98135859	15557	DUP	FALSE	1	51	0	2	6
chr2	98123064	98135859	12796	DUP	FALSE	1	51	0	2	6
chr2	98123064	98153719	30656	DUP	FALSE	1	51	0	2	9
chr2	98135859	98139934	4076	DUP	FALSE	0	0	0	0	1
chr2	98139934	98144857	4924	DUP	FALSE	0	0	0	0	2
chr2	98139934	98169960	30027	DUP	FALSE	38	0	0	0	2
chr2	98139934	98153719	13786	DUP	FALSE	0	0	0	0	2
chr2	98144857	98169960	25104	DUP	FALSE	38	0	0	0	0
chr2	98144857	98153719	8863	DUP	FALSE	0	0	0	0	0
chr2	98153719	98169960	16242	DUP	FALSE	38	0	0	0	0
chr2	98154822	98169960	15139	DUP	FALSE	38	0	0	0	0
chr2	98155925	98197930	42006	DUP	FALSE	97	71	0	1	3
chr2	98155925	98205398	49474	DUP	FALSE	105	72	0	1	3
chr2	98155925	98180298	24374	DUP	FALSE	59	71	0	1	3
chr2	98155925	98169960	14036	DUP	FALSE	38	0	0	0	0
chr2	98155925	98170360	14436	DUP	FALSE	41	0	0	0	0
chr2	98180298	98203646	23349	DUP	FALSE	42	1	0	0	0
chr2	98221384	98247397	26014	DUP	FALSE	13	4	0	0	2
chr2	98288127	98306143	18017	DUP	TRUE	8	0	0	0	0
chr2	98544359	98548065	3707	DEL	TRUE	5	0	0	0	0
chr2	98811118	98822724	11607	DEL	TRUE	15	0	0	0	0
chr2	98856486	98887916	31431	DEL	TRUE	59	0	0	0	2
chr2	100102240	100105225	2986	DEL	TRUE	4	0	0	0	0
chr2	100247617	100251063	3447	DEL	TRUE	3	0	0	0	0
chr2	100315266	100317125	1860	DUP	TRUE	3	0	0	0	0
chr2	100392393	100425264	32872	DUP	TRUE	32	3	0	1	0
chr2	100799170	100802492	3323	DEL	TRUE	2	0	0	0	1
chr2	101164524	101173595	9072	DEL	TRUE	17	1	0	0	1
chr2	101398651	101402986	4336	DEL	TRUE	0	0	0	0	0
chr2	102231890	102234124	2235	DEL	TRUE	6	0	3	0	0
chr2	102860165	102866361	6197	DEL	TRUE	13	0	0	0	0
chr2	105661303	105665989	4687	DEL	TRUE	2	0	0	0	0
chr2	105837042	105841421	4380	DEL	TRUE	8	0	0	0	0
chr2	106140138	106157697	17560	DEL	TRUE	112	0	0	0	0
chr2	106346450	106354689	8240	DEL	TRUE	25	0	0	0	0
chr2	106438658	106440986	2329	DEL	TRUE	12	0	0	0	0
chr2	106820634	106822971	2338	DUP	FALSE	4	1	0	0	0
chr2	106864306	106869479	5174	DUP	FALSE	11	0	0	0	0
chr2	106878774	106886192	7419	DUP	FALSE	6	0	0	0	0
chr2	107650677	107670741	20065	DEL	TRUE	60	0	0	0	0
chr2	107898654	107904805	6152	DEL	TRUE	6	0	0	1	0
chr2	108183113	108184945	1833	DEL	TRUE	0	0	0	0	0
chr2	108274562	108281676	7115	DEL	TRUE	3	0	0	0	0
chr2	108441851	108518376	76526	DUP	FALSE	154	4	1	1	14
chr2	108855153	108856669	1517	DEL	TRUE	4	0	0	0	0
chr2	109305600	109329247	23648	DUP	FALSE	47	0	1	0	0
chr2	109501163	109511095	9933	DEL	TRUE	25	0	0	0	0
chr2	109559758	109566171	6414	DEL	TRUE	10	0	0	0	0
chr2	109685897	109714609	28713	DUP	TRUE	56	0	7	0	1
chr2	110513554	110517122	3569	DUP	FALSE	0	1	0	0	0
chr2	110517122	110517222	101	DUP	FALSE	1	0	0	0	0
chr2	110686899	110733376	46478	DUP	FALSE	15	0	0	0	0
chr2	110733576	110744113	10538	DUP	FALSE	4	0	0	0	3
chr2	110744113	110759205	15093	DUP	FALSE	5	0	0	0	5
chr2	110744762	110759205	14444	DUP	FALSE	5	0	0	0	5
chr2	110745411	110765290	19880	DUP	FALSE	8	0	0	0	6
chr2	110745411	110759205	13795	DUP	FALSE	5	0	0	0	5
chr2	110765290	110770234	4945	DUP	FALSE	2	1	0	0	1
chr2	110786403	110787198	796	DUP	FALSE	0	0	0	0	0
chr2	110792448	110825965	33518	DUP	FALSE	25	13	0	0	9
chr2	110793916	110796824	2909	DUP	FALSE	0	0	0	0	1
chr2	110826065	110857455	31391	DUP	FALSE	32	5	0	1	4
chr2	110857898	110858884	987	DUP	FALSE	1	0	0	0	0
chr2	110858884	110872947	14064	DUP	FALSE	14	0	0	0	0
chr2	110873726	110885926	12201	DUP	FALSE	17	0	0	0	0
chr2	110901160	110901780	621	DUP	FALSE	0	0	0	0	0
chr2	110917622	110918553	932	DUP	FALSE	2	0	0	0	0
chr2	110965405	110965745	341	DUP	FALSE	1	0	0	0	0
chr2	110965745	110967117	1373	DUP	FALSE	0	0	0	0	0
chr2	110967117	110968519	1403	DUP	FALSE	0	0	0	0	0
chr2	111032595	111032745	151	DUP	FALSE	0	0	0	0	0
chr2	111033345	111092986	59642	DUP	FALSE	41	16	0	0	4
chr2	111092986	111094757	1772	DUP	FALSE	2	1	0	0	0
chr2	111094757	111095801	1045	DUP	FALSE	0	0	0	0	1
chr2	111097236	111110221	12986	DUP	FALSE	3	1	0	0	0
chr2	111099631	111116453	16823	DUP	TRUE	3	5	0	0	3
chr2	111116453	111135254	18802	DUP	FALSE	8	0	0	0	4
chr2	111121111	111141520	20410	DUP	FALSE	10	0	0	0	3
chr2	111121111	111135254	14144	DUP	FALSE	6	0	0	0	2
chr2	111153084	111377166	224083	DUP	FALSE	132	8	0	0	14
chr2	111153385	111199808	46424	DUP	FALSE	14	0	0	0	3
chr2	111513464	111525963	12500	DEL	TRUE	19	0	0	0	0
chr2	111552255	111556350	4096	DEL	TRUE	7	0	0	0	0
chr2	111664532	111666659	2128	DEL	TRUE	0	0	0	0	0
chr2	111883656	111886732	3077	DEL	TRUE	3	0	0	0	0
chr2	112020549	112023445	2897	DUP	FALSE	4	0	0	0	0
chr2	112024903	112223461	198559	DUP	FALSE	293	7	0	2	112
chr2	112185630	112189813	4184	DUP	TRUE	5	0	0	0	2
chr2	112276944	112282219	5276	DUP	TRUE	11	0	0	0	0
chr2	112282219	112283547	1329	DUP	FALSE	0	0	0	0	0
chr2	112401599	112411242	9644	DEL	TRUE	18	0	0	0	0
chr2	112478589	112592530	113942	DUP	FALSE	228	6	0	0	8
chr2	112478589	112485810	7222	DUP	FALSE	15	0	0	0	0
chr2	112487277	112489150	1874	DUP	FALSE	2	0	0	0	0
chr2	112647442	112651112	3671	DUP	TRUE	11	0	0	0	0
chr2	112716636	112719700	3065	DEL	TRUE	8	0	0	0	0
chr2	113280473	113290744	10272	DUP	TRUE	21	0	0	0	0
chr2	113412111	113415553	3443	DUP	TRUE	6	0	0	0	0
chr2	114258334	114259635	1302	DUP	FALSE	1	1	0	0	0
chr2	114259635	114260950	1316	DUP	FALSE	6	0	1	0	2
chr2	114365939	114382208	16270	DUP	FALSE	34	0	0	0	2
chr2	114382651	114383056	406	DUP	FALSE	2	0	0	0	0
chr2	114524419	114532965	8547	DEL	TRUE	21	1	0	0	0
chr2	115296442	115303273	6832	DEL	TRUE	11	0	0	1	0
chr2	115583477	115593406	9930	DEL	TRUE	31	1	0	0	0
chr2	115626708	115632668	5961	DEL	TRUE	12	0	0	0	0
chr2	116381492	116384302	2811	DEL	TRUE	4	0	0	0	0
chr2	116401531	116482493	80963	DUP	TRUE	176	0	0	3	1
chr2	116484373	116497448	13076	DUP	TRUE	46	0	0	0	0
chr2	116500351	116507187	6837	DUP	TRUE	11	0	0	1	0
chr2	116501160	116503639	2480	DEL	TRUE	4	0	0	1	0
chr2	116508537	116531318	22782	DUP	TRUE	57	0	0	1	0
chr2	116531968	116661853	129886	DUP	TRUE	324	0	0	0	0
chr2	116661853	116662886	1034	DEL	TRUE	0	0	2	0	0
chr2	116662886	116798483	135598	DUP	TRUE	108	1	0	7	1
chr2	116800157	116845645	45489	DUP	TRUE	87	1	0	3	5
chr2	116972514	116986215	13702	DUP	TRUE	32	0	0	2	0
chr2	117441975	117445877	3903	DEL	TRUE	4	0	0	1	0
chr2	118074703	118078585	3883	DEL	TRUE	11	0	0	0	0
chr2	118557568	118568482	10915	DEL	TRUE	29	0	0	0	0
chr2	118589815	118591321	1507	DEL	TRUE	3	0	0	0	0
chr2	118649266	118670770	21505	DEL	TRUE	58	0	0	0	0
chr2	118881199	118882741	1543	DEL	TRUE	3	0	0	0	0
chr2	118907051	118909851	2801	DUP	TRUE	5	0	0	0	0
chr2	119365233	119367545	2313	DUP	TRUE	0	0	0	0	0
chr2	119432573	119437035	4463	DEL	TRUE	3	0	0	0	0
chr2	120045119	120053346	8228	DEL	TRUE	23	0	0	0	1
chr2	120253593	120456087	202495	DUP	TRUE	234	6	0	2	4
chr2	120457517	120671869	214353	DUP	TRUE	185	7	0	0	6
chr2	120466813	120469440	2628	DEL	TRUE	7	0	0	0	0
chr2	120753976	120765589	11614	DEL	TRUE	26	0	0	1	0
chr2	120802917	120820302	17386	DEL	TRUE	45	0	0	0	0
chr2	121136806	121141465	4660	DEL	TRUE	9	0	0	0	0
chr2	121744245	121747365	3121	DUP	TRUE	3	0	0	0	0
chr2	122061145	122074730	13586	DUP	TRUE	7	0	0	1	0
chr2	122091309	122095269	3961	DEL	TRUE	2	0	0	0	0
chr2	123049639	123067860	18222	DUP	TRUE	13	0	0	0	0
chr2	123067860	123079460	11601	DEL	TRUE	8	0	0	0	0
chr2	123324118	123330135	6018	DEL	TRUE	12	0	0	1	0
chr2	123363616	123365872	2257	DEL	TRUE	4	0	0	0	0
chr2	123467538	123482616	15079	DEL	TRUE	61	0	14	0	0
chr2	123856650	123858298	1649	DEL	TRUE	1	0	0	0	0
chr2	124156973	124161330	4358	DEL	TRUE	16	0	0	0	1
chr2	124331118	124334536	3419	DEL	TRUE	11	0	0	1	0
chr2	125431042	125438357	7316	DEL	TRUE	10	0	0	0	0
chr2	125461646	125465703	4058	DUP	TRUE	5	4	0	0	0
chr2	125639152	125644528	5377	DEL	TRUE	7	0	0	0	0
chr2	125651428	125659751	8324	DEL	TRUE	6	0	0	1	0
chr2	125925203	125935002	9800	DEL	TRUE	7	0	0	1	0
chr2	126367959	126370025	2067	DEL	TRUE	6	0	0	0	0
chr2	126442301	126452009	9709	DEL	TRUE	5	0	0	0	0
chr2	126472888	126476941	4054	DEL	TRUE	9	0	0	0	0
chr2	126479209	126483138	3930	DEL	TRUE	4	0	0	0	0
chr2	126678055	126682939	4885	DEL	TRUE	16	0	0	0	0
chr2	127736621	127756639	20019	DEL	TRUE	66	0	0	0	0
chr2	128100111	128119612	19502	DEL	TRUE	44	1	0	0	0
chr2	128197198	128214693	17496	DUP	TRUE	17	0	0	0	0
chr2	128214693	128221161	6469	DEL	TRUE	11	0	0	0	0
chr2	128222461	128227573	5113	DEL	TRUE	11	0	0	0	0
chr2	128821058	128835228	14171	DEL	TRUE	80	0	0	0	0
chr2	129298147	129313756	15610	DUP	TRUE	18	0	0	0	1
chr2	129325877	129336324	10448	DEL	TRUE	6	0	0	0	0
chr2	129637989	129646629	8641	DEL	TRUE	4	0	0	0	0
chr2	129672896	129696690	23795	DEL	TRUE	47	0	0	0	0
chr2	129785677	129812027	26351	DEL	TRUE	85	0	0	0	0
chr2	129986485	130036171	49687	DEL	TRUE	120	13	0	1	0
chr2	130006231	130012112	5882	DEL	TRUE	16	0	0	0	0
chr2	130039009	130050286	11278	DEL	TRUE	27	0	0	1	1
chr2	130050286	130254019	203734	DEL	TRUE	349	2	2	2	1
chr2	130243122	130254019	10898	DEL	TRUE	11	0	2	0	0
chr2	130254419	130457146	202728	DEL	TRUE	523	1	0	4	1
chr2	130469349	130540128	70780	DEL	TRUE	112	0	0	1	2
chr2	130548608	130548708	101	DUP	FALSE	0	0	0	0	0
chr2	130548708	130553562	4855	DEL	TRUE	21	0	0	0	0
chr2	130554062	130558292	4231	DEL	TRUE	9	0	0	0	0
chr2	130631245	130633850	2606	DEL	TRUE	14	0	0	0	0
chr2	130730435	130736032	5598	DUP	FALSE	19	0	0	0	0
[truncated: 12,468 more rows]

## Sheet: Canvas CNVs
Chrom	Start	Stop	Size	Type	Platinum Variants	Cat1 Failures	Cat2 Failures	Cat3 Failures	Cat4 Failures
chr1	810760	821899	11140	DUP	14	144	0	0	24
chr1	4121814	4127512	5699	DEL	37	9	0	0	10
chr1	14433932	14438975	5044	DEL	9	0	0	0	0
chr1	16149724	16154689	4966	DEL	15	0	0	0	2
chr1	17222655	17269025	46371	DUP	224	180	0	0	50
chr1	25583764	25657501	73738	DEL	64	2	3	2	1
chr1	35102261	35111748	9488	DEL	2	0	21	0	0
chr1	39996197	40001057	4861	DEL	4	0	0	0	0
chr1	41989360	41996776	7417	DEL	39	3	0	0	2
chr1	62114403	62119640	5238	DEL	6	0	6	0	0
chr1	71235200	71240187	4988	DEL	2	0	2	0	0
chr1	72766061	72778928	12868	DEL	1	0	0	0	0
chr1	72806643	72811877	5235	DEL	0	0	0	0	0
chr1	94285414	94291353	5940	DEL	2	0	0	0	0
chr1	107654927	107663501	8575	DEL	8	0	1	0	0
chr1	108730328	108737394	7067	DEL	13	0	0	0	0
chr1	110184762	110191004	6243	DEL	3	0	0	0	0
chr1	110219664	110241437	21774	DEL	20	0	0	0	0
chr1	116227068	116232947	5880	DEL	5	0	0	0	0
chr1	147388285	147394472	6188	DUP	2	124	0	1	1
chr1	147394680	147711965	317286	DUP	268	82	0	1	6
chr1	149216815	149226705	9891	DUP	22	124	0	0	11
chr1	149229420	149239591	10172	DUP	7	32	0	0	14
chr1	152757449	152770825	13377	DEL	7	0	0	0	0
chr1	158865270	158869854	4585	DEL	10	0	0	0	0
chr1	158959557	158966173	6617	DEL	6	0	0	0	0
chr1	161501730	161592330	90601	DUP	320	6	1	2	20
chr1	169226324	169242643	16320	DEL	0	0	11	0	1
chr1	180747522	180756056	8535	DEL	5	0	9	0	0
chr1	187715383	187722490	7108	DEL	0	0	0	0	0
chr1	189704543	189781265	76723	DEL	74	0	100	1	2
chr1	194448416	194452990	4575	DEL	4	0	0	0	0
chr1	199107412	199113812	6401	DEL	4	0	0	0	0
chr1	206280016	206288242	8227	DUP	11	0	0	1	1
chr1	207539433	207545404	5972	DEL	5	0	0	0	0
chr1	210075953	210085794	9842	DEL	7	0	4	0	0
chr1	222371299	222380903	9605	DEL	5	8	4	0	0
chr1	228253104	228259470	6367	DEL	7	0	0	3	0
chr1	229811975	229820528	8554	DEL	3	0	0	0	0
chr1	230526229	230532539	6311	DEL	29	0	0	5	1
chr1	248602489	248646741	44253	DUP	112	5	0	1	46
chr1	248686977	248822932	135956	DEL	221	7	0	0	21
chr2	1523845	1542080	18236	DEL	62	42	1	9	12
chr2	3729770	3738133	8364	DEL	8	0	3	0	0
chr2	4211792	4222828	11037	DEL	18	0	0	0	1
chr2	14704933	14709417	4485	DEL	2	0	1	0	0
chr2	25290023	25298775	8753	DUP	6	0	0	0	1
chr2	34697558	34737861	40304	DEL	2	0	57	0	1
chr2	35972516	35992199	19684	DEL	16	0	0	0	0
chr2	37957822	38003457	45636	DUP	62	0	0	0	940
chr2	48849358	48857792	8435	DEL	14	0	6	0	1
chr2	52746022	52785146	39125	DEL	2	0	0	0	1
chr2	53166328	53182088	15761	DEL	0	0	15	1	0
chr2	59621394	59630708	9315	DEL	1	0	10	0	1
chr2	76771150	76775345	4196	DEL	5	0	0	0	0
chr2	79073174	79081142	7969	DEL	3	0	0	2	1
chr2	89073185	89083868	10684	DUP	11	200	0	0	5
chr2	89097306	89104174	6869	DUP	7	50	0	0	0
chr2	89425240	89453111	27872	DEL	1	0	0	0	1
chr2	89830601	89853049	22449	DUP	18	51	0	2	1
chr2	89885113	89890657	5545	DUP	3	3	0	0	0
chr2	91954673	91961093	6421	DUP	1	47	0	0	2
chr2	92262976	92283172	20197	DUP	33	129	0	1	14
chr2	96678444	96734629	56186	DUP	65	11	0	0	1
chr2	97811644	97877509	65866	DUP	92	460	0	1	31
chr2	106877196	106883896	6701	DEL	11	0	0	0	0
chr2	109687058	109695098	8041	DEL	7	0	7	0	1
chr2	126441977	126451804	9828	DEL	4	0	0	0	0
chr2	127673156	127676972	3817	DEL	3	0	0	0	0
chr2	129636355	129646141	9787	DEL	3	0	0	0	0
chr2	130243388	130249781	6394	DEL	6	0	1	0	0
chr2	132863045	132983767	120723	DUP	85	398	0	7	80
chr2	132986686	133004045	17360	DUP	3	160	0	1	11
chr2	133035113	133065900	30788	DUP	26	618	0	1	23
chr2	133098947	133118323	19377	DUP	2	260	0	1	4
chr2	146860077	146876906	16830	DEL	8	0	0	0	0
chr2	151028718	151038865	10148	DEL	7	0	1	0	0
chr2	154893082	154899052	5971	DEL	10	0	2	0	0
chr2	155817203	155829010	11808	DEL	5	0	15	0	0
chr2	167494109	167500802	6694	DUP	25	0	0	0	0
chr2	173002156	173007581	5426	DEL	9	0	1	0	0
chr2	177262877	177272254	9378	DEL	6	0	0	0	0
chr2	180058578	180080767	22190	DEL	17	0	0	0	2
chr2	184082890	184090799	7910	DEL	11	0	1	0	0
chr2	194687453	194696014	8562	DEL	3	0	0	0	0
chr2	204180240	204190886	10647	DEL	8	0	2	0	1
chr2	208350699	208358460	7762	DEL	3	0	21	0	0
chr2	220049939	220056222	6284	DEL	7	0	0	1	0
chr2	227163310	227170838	7529	DEL	7	0	0	0	0
chr3	226881	234334	7454	DEL	5	0	0	0	1
chr3	612994	663866	50873	DUP	13	173	0	3	19
chr3	5532695	5538936	6242	DEL	18	0	5	0	0
chr3	6650630	6653522	2893	DEL	0	0	4	0	0
chr3	11104992	11111791	6800	DEL	12	0	0	0	0
chr3	16237516	16240994	3479	DEL	7	0	0	0	0
chr3	26033542	26166114	132573	DEL	182	1	9	1	2
chr3	32098121	32107820	9700	DEL	6	0	0	0	0
chr3	43708557	43719234	10678	DUP	4	0	0	1	0
chr3	47485875	47493144	7270	DEL	10	0	0	0	0
chr3	53024559	53038809	14251	DEL	12	1	15	0	1
chr3	65187365	65215077	27713	DEL	9	1	50	0	0
chr3	68739552	68747824	8273	DEL	0	0	0	0	0
chr3	75269955	75274983	5029	DUP	3	115	0	0	3
chr3	75560537	75604166	43630	DEL	394	1	30	6	21
chr3	75779832	75793544	13713	DUP	17	299	0	2	44
chr3	75793984	75800784	6801	DUP	25	69	0	0	8
chr3	75830326	75850426	20101	DUP	34	200	0	5	62
chr3	75980274	75995693	15420	DUP	11	196	0	2	12
chr3	89667403	89677824	10422	DEL	3	0	3	0	0
chr3	98407048	98414620	7573	DEL	2	2	0	1	7
chr3	98896524	98903157	6634	DEL	9	0	0	0	0
chr3	98941837	98949315	7479	DEL	15	0	6	0	0
chr3	101355037	101359828	4792	DEL	2	2	1	0	0
chr3	111242403	111248162	5760	DEL	7	0	0	0	9
chr3	128406048	128413073	7026	DUP	17	0	0	0	0
chr3	129759036	129802608	43573	DEL	119	0	0	0	1
chr3	131986434	131993027	6594	DEL	9	0	6	0	0
chr3	133129725	133136911	7187	DEL	13	4	0	2	4
chr3	136019652	136026089	6438	DEL	3	0	0	0	0
chr3	146382195	146390343	8149	DEL	18	0	0	0	0
chr3	162564442	162625904	61463	DEL	4	0	78	3	0
chr3	162718744	162722000	3257	DEL	0	0	0	0	0
chr3	177291918	177297523	5606	DEL	8	0	14	0	0
chr3	189365205	189370623	5419	DEL	7	0	23	1	0
chr3	189736898	189740307	3410	DEL	6	0	0	1	0
chr3	192874685	192885072	10388	DEL	4	0	0	0	0
chr3	195339144	195424833	85690	DUP	366	155	0	4	59
chr3	195468294	195476520	8227	DUP	32	0	0	0	5
chr3	195947038	195951605	4568	DEL	4	0	3	0	1
chr3	196932428	196938415	5988	DEL	5	0	0	0	0
chr3	197842399	197897124	54726	DUP	35	187	0	3	21
chr4	3568460	3635885	67426	DUP	134	1221	0	2	22
chr4	4109518	4152337	42820	DEL	110	0	0	0	7
chr4	6892646	6899568	6923	DEL	16	0	0	0	0
chr4	10208557	10234476	25920	DEL	12	0	0	0	0
chr4	10390838	10401792	10955	DEL	12	0	8	0	0
chr4	31445740	31450373	4634	DEL	6	0	3	1	0
chr4	33833114	33845789	12676	DUP	1	165	0	1	10
chr4	33855107	33860341	5235	DUP	0	87	0	0	4
chr4	34683084	34688152	5069	DUP	38	0	0	0	0
chr4	34777234	34792633	15400	DEL	12	0	0	0	0
chr4	34819405	34828737	9333	DEL	0	0	0	0	0
chr4	46201152	46204761	3610	DEL	2	0	0	0	0
chr4	48711630	48721837	10208	DEL	24	0	2	1	1
chr4	61936524	61942206	5683	DEL	7	0	0	0	0
chr4	63664825	63676161	11337	DEL	29	0	10	0	0
chr4	69372732	69490974	118243	DEL	8	0	1	0	2
chr4	70121443	70231873	110431	DEL	85	31	176	1	9
chr4	86975661	86980040	4380	DEL	1	0	4	0	0
chr4	91930743	91935851	5109	DEL	3	0	0	0	0
chr4	112238375	112241570	3196	DEL	1	0	2	0	0
chr4	116168209	116176495	8287	DEL	0	0	1	1	0
chr4	130064436	130068367	3932	DEL	3	0	0	0	0
chr4	135430926	135435406	4481	DEL	10	0	6	0	0
chr4	161040541	161072281	31741	DEL	8	0	38	0	1
chr4	161878673	161884816	6144	DEL	2	0	9	1	0
chr4	163391320	163396360	5041	DEL	4	0	0	0	0
chr4	186439412	186443908	4497	DEL	6	0	0	0	0
chr4	190467555	190473518	5964	DUP	5	62	0	0	6
chr4	190662635	190684208	21574	DUP	25	328	0	0	39
chr4	190793687	190802350	8664	DUP	15	84	0	0	8
chr4	191027474	191033716	6243	DUP	0	6	0	0	11
chr5	692016	778172	86157	DEL	131	1	132	4	19
chr5	756422	834887	78466	DUP	158	7	38	3	25
chr5	1175066	1180725	5660	DEL	4	0	0	0	0
chr5	12810515	12820477	9963	DEL	1	0	0	0	0
chr5	21447294	21452376	5083	DEL	5	0	0	0	0
chr5	21452116	21572887	120772	DUP	160	821	0	10	40
chr5	23900360	23905274	4915	DEL	5	0	0	0	0
chr5	26797829	26801390	3562	DEL	0	0	0	0	0
chr5	29420280	29433948	13669	DUP	30	222	0	1	3
chr5	37251766	37257160	5395	DEL	3	0	2	0	0
chr5	42626001	42630994	4994	DEL	13	0	0	0	0
chr5	46319186	46327831	8646	DUP	11	106	0	0	15
chr5	57322343	57333638	11296	DEL	4	0	0	1	0
chr5	59999626	60003484	3859	DEL	5	0	0	0	0
chr5	70305385	70310972	5588	DEL	2	0	2	0	0
chr5	78107525	78111930	4406	DEL	5	0	2	0	0
chr5	83950321	83954835	4515	DEL	0	0	0	0	0
chr5	90497255	90502055	4801	DEL	4	0	0	0	0
chr5	98343615	98347546	3932	DEL	8	0	0	0	0
chr5	104431947	104503551	71605	DEL	19	1	17	1	0
chr5	117384867	117393739	8873	DEL	10	0	5	0	0
chr5	119377586	119382666	5081	DEL	28	0	0	0	0
chr5	135113470	135120715	7246	DEL	5	2	0	0	0
chr5	137804953	137816362	11410	DEL	3	0	1	0	0
chr5	140552019	140558803	6785	DUP	15	0	0	0	0
chr5	142860197	142866080	5884	DEL	0	0	4	1	0
chr5	147550838	147554889	4052	DEL	6	0	0	0	0
chr5	155472687	155488403	15717	DEL	3	0	0	0	0
chr5	164601877	164607191	5315	DUP	10	0	0	0	0
chr5	175345993	175349315	3323	DUP	2	22	0	0	5
chr5	178105183	178113545	8363	DEL	20	0	0	0	0
chr5	180175950	180192624	16675	DUP	44	1	0	1	0
chr5	180373474	180430982	57509	DEL	17	0	51	1	1
chr6	254099	259761	5663	DUP	0	11	0	0	0
chr6	23741747	23745940	4194	DEL	15	0	0	0	0
chr6	26666622	26739700	73079	DUP	84	57	0	1	10
chr6	29840566	29848425	7860	DEL	64	0	0	0	0
chr6	33935529	33942718	7190	DEL	5	0	2	0	0
chr6	35624088	35629165	5078	DEL	6	0	0	0	0
chr6	35750910	35766676	15767	DUP	74	1	0	0	9
chr6	48932378	48937111	4734	DEL	0	0	5	0	0
chr6	53927416	53934777	7362	DEL	1	0	0	0	0
chr6	55824892	55846125	21234	DEL	22	1	0	1	0
chr6	57197187	57248997	51811	DUP	40	615	0	0	12
chr6	67008443	67048841	40399	DEL	24	0	84	4	0
chr6	72862204	72867445	5242	DEL	7	0	4	0	0
chr6	74589346	74602462	13117	DEL	5	0	0	0	0
chr6	74613211	74619885	6675	DEL	3	0	0	0	0
chr6	77095590	77100500	4911	DEL	7	0	0	0	0
chr6	77435182	77453255	18074	DEL	24	0	32	0	0
chr6	78966187	79036260	70074	DEL	1	0	0	0	0
chr6	86633895	86640274	6380	DUP	10	0	0	0	0
chr6	101935350	101938747	3398	DEL	0	0	0	0	0
chr6	103758371	103762789	4419	DEL	0	0	0	0	0
chr6	126182459	126186720	4262	DEL	1	0	2	0	0
chr6	132104306	132108775	4470	DEL	0	0	2	0	0
chr6	132111374	132118199	6826	DEL	12	0	6	0	0
chr6	132372790	132378655	5866	DEL	6	0	4	0	0
chr6	165723339	165731987	8649	DEL	12	0	0	0	0
chr6	170205524	170209742	4219	DEL	4	0	0	1	1
chr7	1853874	1863332	9459	DEL	8	0	16	0	3
chr7	13018999	13028309	9311	DEL	1	0	2	0	0
chr7	22432912	22436596	3685	DEL	2	0	0	0	0
chr7	24034820	24039978	5159	DEL	17	0	0	0	0
chr7	26134921	26145593	10673	DEL	23	0	0	0	1
chr7	29668788	29686836	18049	DEL	5	19	21	0	3
chr7	31312852	31318791	5940	DEL	10	0	0	0	0
chr7	31588045	31591708	3664	DEL	3	0	0	0	0
chr7	38383528	38397041	13514	DEL	23	0	0	0	0
chr7	47087093	47092748	5656	DEL	7	0	0	0	0
chr7	51591451	51598343	6893	DEL	8	0	0	0	0
chr7	56763550	56769837	6288	DEL	2	0	0	0	0
chr7	57603668	57627388	23721	DUP	49	438	0	2	19
chr7	57644958	57707998	63041	DUP	63	644	0	3	63
chr7	57721070	57747478	26409	DUP	26	458	0	4	52
chr7	57885689	57921703	36015	DUP	19	302	0	13	54
chr7	57987122	57997768	10647	DUP	14	211	0	1	19
chr7	61064007	61088671	24665	DUP	48	232	0	4	72
chr7	61662004	61801917	139914	DUP	231	1332	0	10	151
chr7	61835762	61846652	10891	DUP	30	56	0	1	11
chr7	61851766	61905698	53933	DUP	83	404	0	1	84
chr7	62830668	62835378	4711	DEL	4	0	2	0	0
chr7	64714189	64722353	8165	DEL	14	43	0	2	1
chr7	65263332	65285490	22159	DUP	495	0	0	0	4
chr7	70418897	70426265	7369	DEL	9	0	0	0	0
chr7	75662702	75667727	5026	DEL	4	0	0	0	0
chr7	76142454	76146213	3760	DEL	12	0	0	0	0
chr7	96541962	96546371	4410	DEL	2	0	0	0	0
chr7	97385704	97402463	16760	DEL	20	0	3	0	0
chr7	100327302	100337369	10068	DEL	7	0	1	0	0
chr7	110179706	110188329	8624	DEL	6	0	0	0	0
chr7	118829699	118834672	4974	DEL	4	0	3	0	0
chr7	127214019	127217528	3510	DEL	1	0	0	0	0
chr7	141765585	141795021	29437	DEL	0	0	0	0	0
chr7	142042079	142047331	5253	DUP	27	1	0	0	81
chr7	142456994	142462583	5590	DUP	10	148	0	0	9
chr7	142473213	142486250	13038	DEL	62	127	0	3	21
chr7	143437927	143547163	109237	DUP	116	19	0	0	24
chr7	144767950	144774577	6628	DEL	5	0	0	0	0
chr7	148069414	148076269	6856	DEL	16	0	0	0	0
chr7	152071675	152082117	10443	DUP	2	44	0	2	9
chr7	156385458	156393859	8402	DEL	10	0	20	0	0
chr7	157269067	157275793	6727	DEL	44	8	0	0	1
chr8	595447	599407	3961	DEL	0	0	0	0	0
chr8	2179506	2203083	23578	DUP	69	30	0	0	28
chr8	4121038	4124970	3933	DEL	15	0	0	0	0
chr8	11990850	12247988	257139	DEL	645	28	1	2	102
chr8	24970670	24990817	20148	DEL	12	0	0	0	0
chr8	25063646	25070590	6945	DEL	6	0	0	0	0
chr8	39230177	39254222	24046	DEL	8	0	9	0	0
chr8	39365186	39387128	21943	DEL	3	1	44	0	0
chr8	40773510	40779451	5942	DEL	1	0	0	0	0
chr8	42188295	42194136	5842	DEL	2	0	0	0	0
chr8	47521608	47539231	17624	DUP	17	0	0	0	0
chr8	51032606	51037278	4673	DEL	2	0	1	0	0
chr8	52728200	52732120	3921	DUP	6	10	0	0	1
chr8	75360348	75367009	6662	DEL	8	0	0	0	0
chr8	91702919	91733295	30377	DUP	19	1	0	1	0
chr8	94071349	94075981	4633	DEL	5	0	2	0	0
chr8	96873152	96879498	6347	DEL	2	0	0	0	0
chr8	112292660	112296903	4244	DEL	0	0	0	0	0
chr8	120151844	120161222	9379	DEL	8	0	1	0	0
chr8	127190729	127194564	3836	DEL	4	0	0	0	0
chr8	129754792	129765305	10514	DEL	45	0	4	0	0
chr8	137157420	137163977	6558	DEL	1	0	0	0	0
chr8	140602046	140606454	4409	DUP	35	0	0	0	0
chr8	144698849	144714574	15726	DEL	10	0	10	0	0
chr9	22493063	22502834	9772	DEL	10	0	0	0	0
chr9	23362522	23377651	15130	DEL	0	0	0	0	0
chr9	29091264	29097928	6665	DEL	10	0	0	0	0
chr9	38772422	39159411	386990	DUP	828	116	1	8	68
chr9	71735784	71743369	7586	DEL	1	0	0	1	0
chr9	78001144	78011811	10668	DEL	10	0	5	0	0
chr9	79768012	79777244	9233	DUP	13	0	0	0	0
chr9	83965849	83970400	4552	DEL	2	0	1	0	0
chr9	101306441	101311581	5141	DEL	3	0	0	0	0
chr9	104715493	104724368	8876	DEL	0	0	0	0	0
chr9	113023901	113028429	4529	DEL	6	0	6	0	1
chr9	130889491	130900433	10943	DUP	18	171	0	0	4
chr9	133028815	133034224	5410	DEL	13	0	4	0	0
chr9	138215238	138217558	2321	DEL	0	0	0	0	0
chr9	140775227	140785349	10123	DUP	15	43	0	0	2
chr10	4706074	4710469	4396	DEL	2	0	0	0	0
chr10	31244195	31251864	7670	DEL	5	0	0	0	0
chr10	42646108	42658286	12179	DUP	19	149	0	0	5
chr10	47132116	47149312	17197	DUP	35	75	0	0	28
chr10	53202913	53214033	11121	DEL	4	0	17	1	0
chr10	54012890	54018470	5581	DEL	7	0	0	0	0
chr10	54782336	54788721	6386	DEL	7	0	4	0	1
chr10	71279347	71290506	11160	DEL	7	0	17	0	0
chr10	72443481	72451284	7804	DEL	11	0	0	1	2
chr10	78253993	78260992	7000	DEL	7	0	0	0	0
chr10	90796083	90801213	5131	DUP	9	1	0	0	0
chr10	92461245	92465088	3844	DEL	1	0	3	0	0
chr10	100684612	100696647	12036	DEL	4	0	0	0	0
chr10	114110004	114116180	6177	DEL	10	0	0	0	0
chr10	118764460	118769091	4632	DEL	6	0	1	1	1
chr10	132633955	132638725	4771	DEL	11	0	0	0	0
chr10	132986808	132990952	4145	DEL	8	0	0	0	0
chr11	4968009	4978883	10875	DEL	11	0	1	0	0
chr11	5782137	5809252	27116	DEL	55	0	32	0	0
chr11	14872231	14904071	31841	DUP	19	0	0	2	0
chr11	29005298	29012906	7609	DEL	3	0	0	0	0
chr11	31391531	31397851	6321	DEL	7	0	0	0	0
chr11	42959882	42973256	13375	DUP	81	0	0	0	1
chr11	45427890	45431506	3617	DEL	3	0	0	0	0
chr11	47054753	47063529	8777	DEL	2	3	0	0	2
chr11	48337911	48388716	50806	DUP	89	1208	0	0	8
chr11	48598962	48604307	5346	DEL	7	0	0	0	0
chr11	49705594	49757649	52056	DEL	50	0	47	2	3
chr11	50072157	50124432	52276	DUP	184	8	0	1	4
chr11	50299417	50383649	84233	DUP	276	29	0	2	3
chr11	50691330	50700349	9020	DEL	15	44	2	1	19
chr11	50719692	50725951	6260	DUP	33	107	0	0	13
chr11	54954830	54972758	17929	DEL	21	56	5	1	15
chr11	55365842	55453102	87261	DEL	34	0	121	2	1
chr11	70072798	70083603	10806	DEL	7	0	12	0	0
chr11	81853339	81863469	10131	DEL	18	0	2	0	0
chr11	104265526	104273202	7677	DEL	3	0	0	0	0
chr11	114417070	114424593	7524	DUP	15	215	0	0	3
chr11	115015612	115019746	4135	DEL	11	1	0	1	1
chr11	134599282	134607909	8628	DEL	8	0	3	0	1
chr12	291161	297976	6816	DEL	2	0	4	0	0
chr12	374912	385502	10591	DEL	17	0	3	0	0
chr12	863962	874671	10710	DEL	4	0	0	0	1
chr12	2236925	2257139	20215	DEL	6	0	2	0	0
chr12	7992787	8121779	128993	DUP	447	1	0	1	34
chr12	10570806	10589063	18258	DEL	68	6	2	0	1
chr12	11217877	11250371	32495	DEL	54	12	0	0	234
chr12	11502315	11544664	42350	DEL	23	0	83	1	2
chr12	27646545	27655039	8495	DEL	3	0	1	0	0
chr12	30235591	30242386	6796	DEL	4	0	2	0	0
chr12	33293867	33307340	13474	DEL	3	0	0	0	0
chr12	34828837	34842880	14044	DUP	28	208	0	0	9
chr12	37987895	37994702	6808	DEL	12	54	0	0	18
chr12	38009614	38016713	7100	DEL	5	49	0	0	16
chr12	38024433	38029339	4907	DUP	12	9	0	0	2
chr12	45900027	45909897	9871	DEL	9	0	0	0	0
chr12	59932807	59946634	13828	DEL	4	0	0	0	12
chr12	70872096	70877954	5859	DEL	1	0	12	0	0
chr12	80152349	80161679	9331	DUP	4	0	0	1	0
chr12	84589095	84595833	6739	DEL	8	0	0	1	0
chr12	90482927	90491373	8447	DEL	7	0	0	0	0
chr12	98669417	98672091	2675	DEL	2	0	4	0	0
chr12	99793410	99802437	9028	DEL	0	0	3	0	0
chr12	100284917	100291628	6712	DEL	8	0	0	0	0
chr12	102102052	102107012	4961	DEL	0	0	2	0	0
chr12	111973828	111979711	5884	DEL	3	0	1	0	0
chr12	132127354	132137519	10166	DEL	8	0	0	0	0
chr13	19639773	19651702	11930	DUP	40	275	0	2	6
chr13	20823822	20828643	4822	DEL	10	0	1	0	1
chr13	23629747	23636964	7218	DEL	11	0	17	0	1
chr13	31701256	31705470	4215	DEL	1	0	2	0	0
chr13	39054750	39060181	5432	DEL	6	0	0	0	0
chr13	49530677	49536585	5909	DEL	2	0	0	0	0
chr13	51068858	51074566	5709	DEL	3	0	0	0	0
chr13	52787507	52895255	107749	DUP	213	0	0	5	4
chr13	63602353	63648950	46598	DUP	56	1267	0	1	26
chr13	67171739	67177397	5659	DEL	8	0	0	0	0
chr13	72474445	72480612	6168	DEL	8	0	0	0	0
chr13	83164872	83171898	7027	DEL	0	0	4	2	0
chr13	99252218	99257641	5424	DEL	4	0	0	0	0
chr13	101891495	101896330	4836	DEL	10	0	0	0	0
chr13	114502542	114506685	4144	DEL	6	0	0	0	0
chr14	19000000	19044020	44021	DUP	49	343	0	0	54
chr14	19112469	19125959	13491	DUP	11	53	0	2	10
chr14	19368440	19516127	147688	DUP	301	64	0	7	117
chr14	19475736	19496216	20481	DEL	49	2	0	1	15
chr14	20102086	20260723	158638	DUP	238	81	0	5	150
chr14	20300203	20334081	33879	DUP	46	0	0	0	84
chr14	20362378	20422759	60382	DUP	177	0	0	2	73
chr14	20548590	20555014	6425	DEL	7	3	0	0	0
chr14	24436341	24442865	6525	DEL	12	0	2	2	0
chr14	24445426	24464575	19150	DEL	8	0	16	1	0
chr14	35602645	35614591	11947	DEL	12	0	7	0	0
chr14	40607126	40617645	10520	DEL	2	0	0	0	0
chr14	41611227	41669598	58372	DEL	3	0	33	3	0
chr14	54709738	54713511	3774	DEL	2	0	4	0	0
chr14	59364380	59377169	12790	DEL	8	0	27	0	0
chr14	65706637	65712801	6165	DEL	4	0	1	0	0
chr14	73993714	74022499	28786	DUP	12	1	0	0	1
chr14	73994814	74023451	28638	DEL	10	1	0	0	1
chr14	74236867	74246182	9316	DEL	3	1	1	0	0
chr14	80102860	80115032	12173	DEL	0	0	0	1	0
chr14	82496638	82503253	6616	DEL	3	2	0	0	0
chr14	86285138	86312764	27627	DEL	12	0	10	0	1
chr14	106071669	106077355	5687	DEL	18	0	0	0	0
chr14	106084429	106092264	7836	DUP	41	1	0	0	4
chr14	106093204	106100567	7364	DUP	57	0	0	0	1
chr14	106205421	106311913	106493	DEL	57	10	0	18	34
chr14	106704323	107136422	432100	DEL	1568	44	1	162	284
chr14	106784148	106805460	21313	DUP	22	0	0	6	11
chr15	20055974	20149665	93692	DUP	122	691	0	12	198
chr15	20198408	20256185	57778	DUP	122	25	0	0	26
chr15	20218562	20232919	14358	DEL	40	0	0	0	6
chr15	20261015	20373472	112458	DUP	246	81	0	4	61
chr15	20389672	20432754	43083	DUP	119	19	0	1	32
chr15	20627260	20634169	6910	DUP	11	4	0	0	2
chr15	20629505	20710247	80743	DEL	89	7	0	2	10
chr15	20634205	20738559	104355	DUP	102	11	0	2	20
chr15	20748607	20798806	50200	DUP	38	8	0	1	13
chr15	20784316	20829975	45660	DEL	42	5	0	1	3
chr15	20802416	20809593	7178	DUP	9	1	0	0	0
chr15	20816447	20856192	39746	DUP	41	11	0	0	40
chr15	20960891	21183685	222795	DUP	471	101	1	0	89
chr15	21004294	21007977	3684	DEL	3	0	0	0	1
chr15	21173061	21182164	9104	DEL	13	16	0	0	2
chr15	21183693	21184233	541	DUP	2	0	0	0	1
chr15	21184362	21196853	12492	DEL	39	0	0	0	11
chr15	21187669	21205155	17487	DUP	51	0	0	0	11
chr15	22305824	22335957	30134	DUP	179	19	0	0	2
chr15	22340232	22379273	39042	DUP	247	1	0	1	6
chr15	22453072	22487100	34029	DUP	129	1	0	2	4
chr15	22689099	22696537	7439	DUP	0	0	0	0	0
chr15	28555031	28708524	153494	DUP	137	64	0	3	23
chr15	30446869	30456613	9745	DUP	17	1	0	0	3
chr15	30565654	30767235	201582	DEL	255	12	0	0	50
chr15	34701360	34705908	4549	DEL	10	10	0	0	1
chr15	65814111	65819188	5078	DEL	10	1	1	2	0
chr15	71705655	71713718	8064	DEL	9	0	6	0	0
chr15	72938592	72962548	23957	DUP	4	6	0	0	7
chr15	76881866	76895888	14023	DEL	2	0	0	0	1
chr15	77328125	77332636	4512	DEL	2	0	0	0	0
chr15	78238928	78245735	6808	DUP	15	6	0	0	2
chr15	82579171	82951225	372055	DEL	446	3	0	2	24
chr15	94884068	94888486	4419	DUP	9	0	0	0	4
chr15	100414195	100425221	11027	DEL	21	0	7	0	0
chr16	1278162	1287526	9365	DEL	18	12	0	2	2
chr16	12017242	12036299	19058	DEL	33	2	0	1	3
chr16	13291720	13296487	4768	DEL	3	0	0	1	0
chr16	14777792	14810705	32914	DEL	19	0	0	0	0
chr16	14988902	15052972	64071	DUP	43	9	0	1	8
chr16	15110880	15123373	12494	DUP	2	4	0	0	16
chr16	15257063	15262523	5461	DUP	6	2	0	0	0
chr16	15308166	15322870	14705	DUP	18	22	0	0	8
chr16	15359352	15372128	12777	DUP	21	0	0	0	2
chr16	16690167	16702414	12248	DUP	11	30	0	0	4
chr16	16715895	16720321	4427	DUP	10	0	0	1	1
chr16	16722821	16746645	23825	DUP	85	3	0	0	39
chr16	19946839	19966647	19809	DEL	0	0	0	0	0
chr16	22702663	22710452	7790	DUP	6	10	0	0	1
chr16	25337851	25343095	5245	DEL	2	0	0	0	0
chr16	29452689	29578410	125722	DUP	57	1	0	1	9
chr16	32562006	32616550	54545	DUP	16	305	0	2	22
chr16	32857090	32930808	73719	DUP	20	37	0	3	12
chr16	33619506	33632382	12877	DUP	4	37	0	0	2
chr16	33858012	33868099	10088	DUP	6	26	0	0	2
chr16	34457119	34757138	300020	DUP	171	22	0	15	1
chr16	35254946	35271065	16120	DUP	10	200	0	0	17
chr16	55792711	55822345	29635	DEL	42	0	137	1	4
chr16	55829826	55864873	35048	DUP	82	0	0	1	1
chr16	57722613	57727785	5173	DEL	3	0	0	0	0
chr16	58643935	58649954	6020	DEL	18	0	0	0	0
chr16	61907408	61914386	6979	DEL	5	0	3	0	0
chr16	62544621	62550447	5827	DEL	9	0	0	0	0
chr16	70196023	70231637	35615	DUP	31	1	0	2	19
chr16	70882151	70888966	6816	DUP	1	43	0	0	7
chr16	74361777	74407347	45571	DUP	94	8	0	0	9
chr16	76536087	76543815	7729	DEL	5	0	0	0	0
chr16	78290902	78295760	4859	DEL	5	0	4	0	1
chr16	80973341	80983191	9851	DEL	4	0	1	0	1
chr17	190912	197137	6226	DEL	7	0	2	0	0
chr17	15534168	15545810	11643	DEL	0	0	0	3	3
chr17	16061801	16070422	8622	DUP	5	36	0	1	10
chr17	16654056	16748015	93960	DUP	196	7	0	4	27
chr17	16708498	16737373	28876	DEL	57	0	0	2	13
chr17	16744590	16749609	5020	DEL	13	0	0	0	4
chr17	18333926	18405073	71148	DEL	137	7	0	2	20
chr17	18361105	18405155	44051	DUP	82	4	0	1	7
chr17	18972153	19141976	169824	DUP	78	2	0	1	10
chr17	20765019	20784664	19646	DUP	16	329	0	1	16
chr17	21504830	21529899	25070	DUP	37	407	0	0	18
chr17	21671503	21684223	12721	DUP	11	357	0	0	9
chr17	25307462	25335630	28169	DUP	83	244	0	1	25
chr17	34436924	34503721	66798	DUP	184	2	1	0	23
chr17	34501577	34568973	67397	DEL	54	0	0	0	10
chr17	34565827	34573172	7346	DUP	2	0	0	0	0
chr17	34776674	34783068	6395	DUP	13	0	0	0	1
chr17	35752391	35758956	6566	DEL	7	0	0	0	0
chr17	39419703	39432176	12474	DEL	6	0	0	0	0
chr17	43570032	43590561	20530	DEL	29	0	2	0	2
chr17	43610819	43619235	8417	DUP	5	1	0	0	0
chr17	43629398	43636517	7120	DUP	3	0	0	0	0
chr17	43636597	43650083	13487	DEL	3	0	0	0	1
chr17	43647295	43662318	15024	DUP	9	48	0	0	2
chr17	43671468	43676257	4790	DEL	9	0	0	0	0
chr17	43676055	43680589	4535	DUP	9	0	0	0	0
chr17	44163221	44183304	20084	DUP	103	1	0	0	5
chr17	44210784	44238353	27570	DUP	125	1	0	1	6
chr17	44266623	44297503	30881	DUP	159	0	0	0	5
chr17	44361942	44396631	34690	DUP	71	2	1	0	6
chr17	44365822	44566365	200544	DEL	226	0	1	0	8
chr17	51854091	51859556	5466	DEL	2	0	7	0	0
chr17	54156134	54172769	16636	DEL	34	0	11	0	0
chr17	77492522	77528661	36140	DEL	31	0	0	3	0
chr18	14178245	14187395	9151	DUP	16	108	0	1	34
chr18	14282623	14294957	12335	DEL	7	3	12	1	1
chr18	14717426	14723981	6556	DEL	35	0	0	0	2
chr18	15333211	15405345	72135	DUP	32	322	0	3	57
chr18	30494147	30501064	6918	DEL	2	0	1	0	0
chr18	38257407	38266685	9279	DEL	13	0	0	1	0
chr18	38861440	38868453	7014	DEL	10	0	0	0	0
chr18	44540177	44546498	6322	DUP	20	0	0	0	1
chr18	47692511	47698338	5828	DEL	3	0	0	0	0
chr18	51205669	51209765	4097	DEL	0	0	4	0	0
chr18	54944546	54948523	3978	DEL	4	1	0	0	0
chr18	63721400	63732260	10861	DEL	14	0	6	0	0
chr18	63764784	63769214	4431	DEL	4	0	7	0	0
chr18	76658339	76666416	8078	DEL	14	0	1	1	0
chr19	4119591	4123430	3840	DEL	4	0	0	2	1
chr19	7025398	7030573	5176	DUP	2	1	0	0	1
chr19	8334162	8351479	17318	DEL	72	0	1	0	1
chr19	8846314	8856126	9813	DUP	23	1	0	0	3
chr19	12692479	12698506	6028	DEL	3	0	0	0	0
chr19	15043190	15049380	6191	DEL	18	0	0	0	0
chr19	20505006	20717277	212272	DEL	328	74	57	2	20
chr19	21746926	21756746	9821	DUP	23	1	0	0	92
chr19	24595460	24605339	9880	DUP	12	84	0	0	3
chr19	27834460	27898014	63555	DUP	90	1058	0	2	29
chr19	30000240	30005312	5073	DEL	19	0	0	4	13
chr19	35658620	35665566	6947	DEL	25	0	0	0	0
chr19	35849057	35861286	12230	DEL	8	0	42	1	0
chr19	36837156	36847004	9849	DEL	6	0	6	0	0
chr19	40365450	40374592	9143	DUP	31	15	0	1	2
chr19	40374285	40383362	9078	DEL	19	0	0	0	0
chr19	43520626	43574630	54005	DUP	184	0	0	6	3
chr19	43663096	43677044	13949	DEL	19	0	23	0	0
chr19	46622173	46627522	5350	DEL	2	0	1	0	0
chr19	48404293	48412032	7740	DUP	7	0	0	0	1
chr19	50583113	50640042	56930	DUP	37	2	0	2	7
chr19	51074952	51082250	7299	DEL	10	0	0	0	0
chr19	51330514	51334876	4363	DEL	2	0	5	0	0
chr19	52131534	52149090	17557	DEL	4	0	0	0	2
chr19	54555257	54560612	5356	DEL	8	0	7	0	3
chr19	54726268	54743463	17196	DUP	153	1	2	0	1
chr19	54798028	54807615	9588	DEL	15	0	14	0	0
chr19	55246343	55256527	10185	DUP	96	5	0	1	48
chr19	55255661	55283415	27755	DEL	132	5	20	7	59
chr19	55342615	55355038	12424	DEL	15	0	4	5	28
chr20	1551183	1566735	15553	DEL	24	0	3	0	0
chr20	14071379	14076119	4741	DEL	3	0	0	0	0
chr20	15299472	15303750	4279	DEL	4	0	0	0	0
chr20	25731541	25766418	34878	DUP	23	331	0	2	56
chr20	25859193	25873707	14515	DUP	29	122	0	2	28
chr20	25930622	25946280	15659	DUP	33	160	0	0	14
chr20	26074403	26111159	36757	DUP	59	508	0	1	48
chr20	26118313	26149647	31335	DUP	33	603	0	3	23
chr20	26196363	26208801	12439	DUP	4	209	0	1	6
chr20	26234182	26250146	15965	DUP	24	156	0	2	42
chr20	29471524	29505995	34472	DUP	50	338	13	3	21
chr20	31522733	31528823	6091	DEL	5	0	0	0	0
chr20	37004823	37015131	10309	DEL	12	0	4	0	0
chr20	44201710	44207200	5491	DEL	8	0	3	0	0
chr20	52473614	52484092	10479	DUP	15	224	0	0	2
chr20	52646519	52657851	11333	DEL	2	0	12	0	0
chr21	14338201	14362373	24173	DUP	4	360	0	2	54
chr21	21957174	21960569	3396	DEL	19	6	0	0	0
chr21	43348135	43353533	5399	DEL	7	0	3	0	0
chr21	44969220	44973197	3978	DEL	1	0	0	0	0
chr22	17038492	17046120	7629	DEL	7	72	0	0	8
chr22	17768036	17774262	6227	DEL	2	0	0	0	0
chr22	18656177	18682633	26457	DUP	22	1	0	0	14
chr22	20310706	20491778	181073	DEL	126	36	0	3	84
chr22	20484702	20494018	9317	DUP	10	0	0	0	3
chr22	22764545	23180655	416111	DEL	486	6	12	60	285
chr22	23206607	23243726	37120	DEL	28	1	1	121	17
chr22	23766904	23774296	7393	DUP	2	0	0	0	46
chr22	24054330	24061748	7419	DUP	10	0	0	0	0
chr22	24271091	24312177	41087	DEL	97	0	0	0	3
chr22	24337234	24397268	60035	DEL	71	2	5	2	0
chr22	31774007	31780396	6390	DEL	4	0	0	0	0
chr22	37140080	37147639	7560	DEL	5	0	0	0	3
chr22	42523688	42538933	15246	DUP	67	0	0	0	2
chr22	50772975	50779134	6160	DEL	32	4	0	0	0
