# Supplementary material for: A reference data set of 5.4 million phased human variants validated by genetic inheritance from sequencing a three-generation 17-member pedigree
Source: HighWire-hosted journal article supplement (doi:10.1101/gr.210500.116), 2016-11-30
Supplement: Supplemental_Table_S16.xlsx [file Supplemental_Table_S16.xlsx]

## Sheet: Sheet
Chrom	Position	GC-Group	Sample	Expected_GT	Observed_GT	Reads Supporting Ref Allele	Reads Supporting Alt Allele	Paternal GC	Maternal GC
chr1	5439068	1	NA12888	0/0	0/1	54	13	FALSE	TRUE
chr1	6134990	2	NA12882	1/1	0/1	28	23	TRUE	TRUE
chr1	19470662	3	NA12893	0/0	0/1	25	39	FALSE	TRUE
chr1	21809175	4	NA12881	0/0	0/1	37	16	FALSE	TRUE
chr1	39985259	5	NA12884	1/1	0/1	24	38	TRUE	TRUE
chr1	40236973	6	NA12887	0/0	0/1	41	14	FALSE	TRUE
chr1	51712779	7	NA12888	0/1	0/0	52	0	FALSE	TRUE
chr1	58197487	8	NA12880	0/0	0/1	27	22	TRUE	TRUE
chr1	61751927	9	NA12882	1/1	0/1	24	20	TRUE	TRUE
chr1	79745635	10	NA12880	0/1	0/0	36	2	TRUE	FALSE
chr1	90322384	11	NA12884	0/1	0/0	70	0	TRUE	FALSE
chr1	98725017	12	NA12880	1/1	0/1	31	33	FALSE	TRUE
chr1	148002272	13	NA12880	1/1	0/1	13	45	TRUE	TRUE
chr1	168513109	14	NA12888	0/0	0/1	29	28	FALSE	TRUE
chr1	183468291	15	NA12893	0/0	0/1	30	29	FALSE	TRUE
chr1	202129196	16	NA12885	0/1	1/1	0	53	FALSE	TRUE
chr1	212345520	17	NA12884	0/1	1/1	0	50	FALSE	TRUE
chr1	214192133	18	NA12884	0/0	0/1	23	15	TRUE	TRUE
chr1	232107823	19	NA12880	0/0	0/1	28	21	FALSE	TRUE
chr1	232185635	20	NA12880	0/1	0/0	46	0	FALSE	TRUE
chr1	232187102	20	NA12880	0/1	0/0	49	0	FALSE	TRUE
chr1	232200012	21	NA12880	0/1	0/0	47	0	FALSE	TRUE
chr1	232200235	21	NA12880	0/1	0/0	47	0	FALSE	TRUE
chr1	232201400	21	NA12880	0/1	0/0	62	0	FALSE	TRUE
chr1	232202423	21	NA12880	1/1	0/1	13	24	FALSE	TRUE
chr1	232202737	21	NA12880	0/1	0/0	48	0	FALSE	TRUE
chr1	232203020	21	NA12880	0/1	0/0	63	0	FALSE	TRUE
chr1	232203923	21	NA12880	0/1	0/0	69	0	FALSE	TRUE
chr1	232203960	21	NA12880	0/1	0/0	58	0	FALSE	TRUE
chr1	232204309	21	NA12880	0/1	0/0	38	0	FALSE	TRUE
chr1	232205035	21	NA12880	0/1	0/0	55	0	FALSE	TRUE
chr1	232208705	21	NA12880	0/1	1/1	0	63	FALSE	TRUE
chr1	232210339	21	NA12880	0/0	0/1	22	33	FALSE	TRUE
chr1	232210350	21	NA12880	0/1	1/1	0	54	FALSE	TRUE
chr1	232210866	21	NA12880	0/1	1/1	0	58	FALSE	TRUE
chr1	232210903	21	NA12880	0/1	1/1	0	48	FALSE	TRUE
chr1	232217111	21	NA12880	0/1	1/1	0	55	FALSE	TRUE
chr1	246606951	22	NA12883	0/1	0/0	47	0	TRUE	FALSE
chr1	246633822	23	NA12893	0/1	0/0	32	0	TRUE	FALSE
chr1	246687057	24	NA12893	0/1	0/0	45	0	FALSE	TRUE
chr1	247032440	25	NA12887	0/0	0/1	19	26	TRUE	FALSE
chr2	3914727	26	NA12880	0/0	0/1	27	29	FALSE	TRUE
chr2	3975409	27	NA12882	0/1	0/0	41	0	TRUE	FALSE
chr2	48968677	28	NA12887	0/0	0/1	47	15	TRUE	TRUE
chr2	64085809	29	NA12881	0/0	0/1	27	33	FALSE	TRUE
chr2	82221837	30	NA12887	1/1	0/1	16	37	TRUE	TRUE
chr2	88835687	31	NA12879	0/0	0/1	22	19	TRUE	TRUE
chr2	101191844	32	NA12893	0/1	1/1	0	45	TRUE	FALSE
chr2	114283387	33	NA12879	1/1	0/1	18	38	TRUE	TRUE
chr2	128965925	34	NA12880	0/1	0/0	33	1	TRUE	FALSE
chr2	132286061	35	NA12885	1/1	0/1	10	30	TRUE	TRUE
chr2	132528889	36	NA12885	1/1	0/1	14	22	TRUE	TRUE
chr2	132553993	37	NA12885	1/1	0/1	20	27	TRUE	TRUE
chr2	137669905	38	NA12885	1/1	0/1	14	29	TRUE	TRUE
chr2	157592784	39	NA12883	1/1	0/1	25	28	TRUE	TRUE
chr2	157593517	39	NA12883	0/1	0/0	34	0	FALSE	TRUE
chr2	205799904	40	NA12886	0/1	0/0	45	0	FALSE	TRUE
chr2	212998131	41	NA12881	1/1	0/1	13	46	TRUE	TRUE
chr2	230252237	42	NA12886	0/1	0/0	69	0	FALSE	TRUE
chr2	231878362	43	NA12879	0/0	0/1	17	18	TRUE	FALSE
chr2	233245090	44	NA12887	0/0	0/1	38	14	TRUE	TRUE
chr2	239174693	45	NA12880	0/1	0/0	40	0	TRUE	FALSE
chr3	732458	46	NA12888	0/1	0/0	56	0	FALSE	TRUE
chr3	4025573	47	NA12883	0/1	1/1	0	50	TRUE	FALSE
chr3	10090747	48	NA12884	0/0	0/1	58	17	TRUE	TRUE
chr3	16665719	49	NA12893	1/1	0/1	22	29	TRUE	FALSE
chr3	24527952	50	NA12886	0/1	0/0	63	0	TRUE	FALSE
chr3	24529750	50	NA12886	0/1	0/0	72	0	TRUE	FALSE
chr3	56955255	51	NA12880	0/1	0/0	46	0	FALSE	TRUE
chr3	60407864	52	NA12883	0/0	0/1	27	23	FALSE	TRUE
chr3	65258292	53	NA12893	1/1	0/1	28	36	FALSE	TRUE
chr3	78623502	54	NA12888	0/0	0/1	40	11	TRUE	FALSE
chr3	94521327	55	NA12893	0/1	0/0	50	0	FALSE	TRUE
chr3	94832102	56	NA12879	1/1	0/1	30	27	TRUE	TRUE
chr3	165722425	57	NA12893	0/0	0/1	28	26	TRUE	TRUE
chr3	168814767	58	NA12893	0/1	0/0	39	2	TRUE	FALSE
chr3	176808976	59	NA12879	0/0	0/1	24	36	TRUE	FALSE
chr3	189718756	60	NA12883	0/1	0/0	55	0	FALSE	TRUE
chr3	195597549	61	NA12884	1/1	0/1	19	22	TRUE	TRUE
chr3	195775142	62	NA12883	1/1	0/1	24	23	TRUE	TRUE
chr4	11701193	63	NA12885	0/0	0/1	38	15	TRUE	FALSE
chr4	76329462	64	NA12882	1/1	0/1	34	27	TRUE	TRUE
chr4	87870334	65	NA12893	0/1	0/0	45	0	TRUE	FALSE
chr4	111797773	66	NA12880	0/0	0/1	25	11	FALSE	TRUE
chr4	117760963	67	NA12893	0/1	0/0	45	2	FALSE	TRUE
chr4	119530749	68	NA12879	0/0	0/1	54	15	FALSE	TRUE
chr4	119532807	68	NA12879	0/0	0/1	54	17	FALSE	TRUE
chr4	133694656	69	NA12888	0/0	0/1	49	10	FALSE	TRUE
chr4	162755097	70	NA12882	0/0	0/1	24	36	FALSE	TRUE
chr4	187408091	71	NA12887	1/1	0/1	37	26	TRUE	TRUE
chr4	188928942	72	NA12888	0/0	0/1	20	18	TRUE	TRUE
chr4	188937545	73	NA12887	1/1	0/1	13	29	TRUE	TRUE
chr4	190467069	74	NA12880	1/1	0/1	33	25	TRUE	TRUE
chr4	190467071	74	NA12880	1/1	0/1	33	24	TRUE	TRUE
chr5	217182	75	NA12879	0/1	0/0	58	0	TRUE	FALSE
chr5	294801	76	NA12879	0/1	0/0	51	0	TRUE	FALSE
chr5	294811	76	NA12879	0/1	0/0	55	0	TRUE	FALSE
chr5	3679673	77	NA12893	0/0	0/1	21	13	TRUE	FALSE
chr5	8074295	78	NA12882	0/1	1/1	0	61	TRUE	FALSE
chr5	25504811	79	NA12893	0/1	1/1	0	47	TRUE	FALSE
chr5	34993759	80	NA12884	1/1	0/1	15	32	TRUE	TRUE
chr5	40588364	81	NA12885	1/1	0/1	15	37	TRUE	FALSE
chr5	86235292	82	NA12885	0/1	0/0	42	0	TRUE	FALSE
chr5	98827134	83	NA12893	0/1	0/0	66	0	TRUE	FALSE
chr5	122958318	84	NA12883	1/1	0/1	10	22	TRUE	TRUE
chr5	122958325	84	NA12883	1/1	0/1	10	18	TRUE	TRUE
chr5	122958329	84	NA12883	1/1	0/1	10	15	TRUE	TRUE
chr5	126109705	85	NA12893	0/0	0/1	24	24	TRUE	TRUE
chr5	166825833	86	NA12888	0/0	0/1	39	11	FALSE	TRUE
chr6	936018	87	NA12885	0/1	0/0	49	0	TRUE	FALSE
chr6	1529302	88	NA12879	0/1	0/0	65	0	TRUE	FALSE
chr6	2208822	89	NA12893	0/0	0/1	18	27	TRUE	FALSE
chr6	4659888	90	NA12886	0/1	1/1	0	49	TRUE	FALSE
chr6	4660043	90	NA12886	0/1	1/1	0	34	TRUE	FALSE
chr6	4660075	90	NA12886	0/1	1/1	0	46	TRUE	FALSE
chr6	11722265	91	NA12887	0/0	0/1	55	11	FALSE	TRUE
chr6	114519972	92	NA12893	0/1	0/0	38	1	FALSE	TRUE
chr6	143721211	93	NA12880	0/1	0/0	49	0	FALSE	TRUE
chr6	166361604	94	NA12882	1/1	0/1	32	23	FALSE	TRUE
chr6	167616285	95	NA12888	1/1	0/1	12	53	TRUE	TRUE
chr6	167617073	95	NA12888	1/1	0/1	18	58	TRUE	TRUE
chr6	167617944	95	NA12888	1/1	0/1	16	56	TRUE	TRUE
chr6	167621703	95	NA12888	1/1	0/1	29	46	TRUE	TRUE
chr6	167803553	96	NA12888	0/0	0/1	44	23	TRUE	TRUE
chr6	169359664	97	NA12885	0/1	1/1	0	33	FALSE	TRUE
chr7	5415194	98	NA12881	0/0	0/1	30	29	FALSE	TRUE
chr7	11504410	99	NA12884	0/0	0/1	38	12	FALSE	TRUE
chr7	11523163	100	NA12881	0/0	0/1	37	27	TRUE	FALSE
chr7	13444864	101	NA12888	0/0	0/1	26	25	FALSE	TRUE
chr7	13535606	102	NA12888	1/1	0/1	20	27	TRUE	TRUE
chr7	13538276	102	NA12888	1/1	0/1	26	28	TRUE	TRUE
chr7	13542897	102	NA12888	0/0	0/1	27	24	FALSE	TRUE
chr7	13543273	102	NA12888	1/1	0/1	31	31	TRUE	TRUE
chr7	13548173	102	NA12888	0/0	0/1	33	35	FALSE	TRUE
chr7	13549136	102	NA12888	1/1	0/1	16	17	TRUE	TRUE
chr7	13554525	102	NA12888	1/1	0/1	34	26	TRUE	TRUE
chr7	13573781	103	NA12888	1/1	0/1	28	24	TRUE	TRUE
chr7	13576424	103	NA12888	1/1	0/1	27	27	FALSE	TRUE
chr7	13576455	103	NA12888	1/1	0/1	30	24	FALSE	TRUE
chr7	13576932	103	NA12888	1/1	0/1	18	24	TRUE	TRUE
chr7	13577359	103	NA12888	1/1	0/1	22	19	TRUE	TRUE
chr7	13577494	103	NA12888	1/1	0/1	23	29	TRUE	TRUE
chr7	13577587	103	NA12888	1/1	0/1	32	28	TRUE	TRUE
chr7	13577880	103	NA12888	1/1	0/1	33	28	FALSE	TRUE
chr7	13577911	103	NA12888	1/1	0/1	30	28	FALSE	TRUE
chr7	13578100	103	NA12888	1/1	0/1	30	32	FALSE	TRUE
chr7	13578129	103	NA12888	1/1	0/1	32	28	TRUE	TRUE
chr7	13578340	103	NA12888	1/1	0/1	27	28	TRUE	TRUE
chr7	13578609	103	NA12888	1/1	0/1	30	34	FALSE	TRUE
chr7	13578757	103	NA12888	1/1	0/1	20	34	TRUE	TRUE
chr7	13578829	103	NA12888	1/1	0/1	27	31	FALSE	TRUE
chr7	13578950	103	NA12888	1/1	0/1	26	28	TRUE	TRUE
chr7	13578984	103	NA12888	1/1	0/1	24	31	TRUE	TRUE
chr7	13579016	103	NA12888	1/1	0/1	20	31	TRUE	TRUE
chr7	13579051	103	NA12888	1/1	0/1	22	31	TRUE	TRUE
chr7	13579287	103	NA12888	1/1	0/1	26	18	TRUE	TRUE
chr7	13579328	103	NA12888	1/1	0/1	32	18	TRUE	TRUE
chr7	13579371	103	NA12888	1/1	0/1	30	23	TRUE	TRUE
chr7	13579389	103	NA12888	1/1	0/1	35	23	TRUE	TRUE
chr7	13579414	103	NA12888	1/1	0/1	36	22	TRUE	TRUE
chr7	13579421	103	NA12888	1/1	0/1	36	22	TRUE	TRUE
chr7	13579436	103	NA12888	1/1	0/1	37	22	FALSE	TRUE
chr7	13579595	103	NA12888	1/1	0/1	24	23	TRUE	TRUE
chr7	13579615	103	NA12888	1/1	0/1	22	21	FALSE	TRUE
chr7	13579874	103	NA12888	1/1	0/1	23	29	FALSE	TRUE
chr7	13580065	103	NA12888	1/1	0/1	23	27	FALSE	TRUE
chr7	13580341	103	NA12888	1/1	0/1	28	20	FALSE	TRUE
chr7	13580522	103	NA12888	1/1	0/1	25	31	TRUE	TRUE
chr7	13580566	103	NA12888	1/1	0/1	25	29	FALSE	TRUE
chr7	13581020	103	NA12888	1/1	0/1	32	19	FALSE	TRUE
chr7	13590910	103	NA12888	1/1	0/1	19	21	FALSE	TRUE
chr7	13591095	103	NA12888	1/1	0/1	31	26	TRUE	TRUE
chr7	13591197	103	NA12888	1/1	0/1	33	25	TRUE	TRUE
chr7	13591674	103	NA12888	1/1	0/1	18	31	TRUE	TRUE
chr7	13592464	103	NA12888	1/1	0/1	29	26	TRUE	TRUE
chr7	13606329	104	NA12888	1/1	0/1	19	28	FALSE	TRUE
chr7	13609269	104	NA12888	1/1	0/1	25	25	TRUE	TRUE
chr7	13611486	104	NA12888	1/1	0/1	31	32	FALSE	TRUE
chr7	13614013	104	NA12888	1/1	0/1	18	22	FALSE	TRUE
chr7	13614348	104	NA12888	1/1	0/1	27	21	TRUE	TRUE
chr7	13616970	104	NA12888	1/1	0/1	40	33	FALSE	TRUE
chr7	13623212	104	NA12888	0/0	0/1	18	26	FALSE	TRUE
chr7	13627736	104	NA12888	1/1	0/1	25	16	TRUE	TRUE
chr7	13631132	104	NA12888	1/1	0/1	26	19	TRUE	TRUE
chr7	13632228	104	NA12888	1/1	0/1	21	21	TRUE	TRUE
chr7	13632242	104	NA12888	0/1	0/0	42	0	FALSE	TRUE
chr7	13632436	104	NA12888	0/1	1/1	0	42	FALSE	TRUE
chr7	13635699	104	NA12888	0/1	0/0	45	0	FALSE	TRUE
chr7	13635955	104	NA12888	0/1	1/1	0	48	FALSE	TRUE
chr7	13644424	104	NA12888	0/1	0/0	37	0	FALSE	TRUE
chr7	22622138	105	NA12880	1/1	0/1	20	45	FALSE	TRUE
chr7	34704229	106	NA12893	0/0	0/1	20	41	FALSE	TRUE
chr7	37356776	107	NA12885	0/0	0/1	20	28	TRUE	FALSE
chr7	45419158	108	NA12880	1/1	0/1	22	36	TRUE	TRUE
chr7	57008674	109	NA12880	1/1	0/1	17	29	TRUE	TRUE
chr7	57011078	109	NA12880	1/1	0/1	16	28	TRUE	TRUE
chr7	57012996	109	NA12880	1/1	0/1	24	31	TRUE	TRUE
chr7	57013007	109	NA12880	1/1	0/1	27	28	TRUE	TRUE
chr7	57013448	109	NA12880	1/1	0/1	19	26	TRUE	TRUE
chr7	57013522	109	NA12880	1/1	0/1	19	26	TRUE	TRUE
chr7	57021607	109	NA12880	1/1	0/1	20	33	TRUE	TRUE
chr7	57021821	109	NA12880	1/1	0/1	24	47	TRUE	TRUE
chr7	57022392	109	NA12880	1/1	0/1	24	24	TRUE	TRUE
chr7	57022745	109	NA12880	1/1	0/1	21	37	TRUE	TRUE
chr7	57024573	109	NA12880	1/1	0/1	16	28	TRUE	TRUE
chr7	57026006	109	NA12880	1/1	0/1	23	33	TRUE	TRUE
chr7	57029538	109	NA12880	1/1	0/1	21	39	TRUE	TRUE
chr7	57030079	109	NA12880	1/1	0/1	15	27	TRUE	TRUE
chr7	57031174	109	NA12880	1/1	0/1	18	41	TRUE	TRUE
chr7	63015742	110	NA12880	1/1	0/1	20	26	TRUE	TRUE
chr7	63019432	110	NA12880	1/1	0/1	18	36	TRUE	TRUE
chr7	63023528	110	NA12880	1/1	0/1	33	24	TRUE	TRUE
chr7	63027611	110	NA12880	1/1	0/1	35	28	TRUE	TRUE
chr7	63028446	110	NA12880	1/1	0/1	27	31	TRUE	TRUE
chr7	63052095	111	NA12880	1/1	0/1	29	21	TRUE	TRUE
chr7	63053639	111	NA12880	1/1	0/1	26	28	TRUE	TRUE
chr7	63084547	112	NA12880	1/1	0/1	37	34	TRUE	TRUE
chr7	63095368	113	NA12880	1/1	0/1	41	27	TRUE	TRUE
chr7	66719183	114	NA12882	0/1	0/0	37	0	TRUE	FALSE
chr7	68458888	115	NA12893	0/1	1/1	0	44	TRUE	FALSE
chr7	72062572	116	NA12880	1/1	0/1	26	30	TRUE	TRUE
chr7	72360838	117	NA12884	1/1	0/1	33	17	TRUE	TRUE
chr7	74344705	118	NA12880	1/1	0/1	34	21	TRUE	TRUE
chr7	74373826	119	NA12880	1/1	0/1	28	32	TRUE	TRUE
chr7	74632406	120	NA12880	1/1	0/1	35	27	TRUE	TRUE
chr7	75142551	121	NA12880	1/1	0/1	10	54	TRUE	TRUE
chr7	109648674	122	NA12879	0/0	0/1	23	20	FALSE	TRUE
chr7	129666975	123	NA12886	0/1	0/0	49	0	TRUE	FALSE
chr7	129932122	124	NA12879	0/1	1/1	0	48	FALSE	TRUE
chr7	139035666	125	NA12886	0/0	0/1	21	33	TRUE	FALSE
chr7	143476141	126	NA12883	1/1	0/1	14	23	TRUE	TRUE
chr7	149617625	127	NA12880	0/0	0/1	39	14	TRUE	FALSE
chr7	149701102	128	NA12888	1/1	0/1	20	35	TRUE	TRUE
chr7	149701104	128	NA12888	1/1	0/1	18	36	TRUE	TRUE
chr7	149870860	129	NA12884	0/0	0/1	41	17	FALSE	TRUE
chr7	149877416	129	NA12884	0/0	0/1	44	14	FALSE	TRUE
chr7	152469908	130	NA12884	0/1	0/0	51	0	FALSE	TRUE
chr7	153433549	131	NA12880	0/0	0/1	62	11	TRUE	FALSE
chr7	153462052	132	NA12880	0/0	0/1	43	13	TRUE	FALSE
chr7	153513289	133	NA12880	0/0	0/1	52	18	TRUE	FALSE
chr7	153686443	134	NA12884	0/0	0/1	28	20	FALSE	TRUE
chr7	153686452	134	NA12884	0/0	0/1	27	18	FALSE	TRUE
chr7	153688189	134	NA12884	0/0	0/1	37	12	FALSE	TRUE
chr7	153698706	135	NA12884	1/1	0/1	13	48	FALSE	TRUE
chr7	153698712	135	NA12884	0/0	0/1	45	12	FALSE	TRUE
chr7	153793153	136	NA12884	0/0	0/1	30	17	FALSE	TRUE
chr7	154511129	137	NA12883	1/1	0/1	36	33	TRUE	TRUE
chr7	155059445	138	NA12879	1/1	0/1	25	19	TRUE	TRUE
chr7	156701593	139	NA12887	0/0	0/1	34	13	FALSE	TRUE
chr8	2034457	140	NA12886	0/0	0/1	20	18	TRUE	FALSE
chr8	2210907	141	NA12885	1/1	0/1	32	40	TRUE	TRUE
chr8	7189358	142	NA12886	1/1	0/1	15	48	TRUE	TRUE
chr8	17321564	143	NA12885	0/1	1/1	0	40	FALSE	TRUE
chr8	18317788	144	NA12880	0/0	0/1	35	25	TRUE	FALSE
chr8	22081708	145	NA12884	0/1	0/0	60	0	FALSE	TRUE
chr8	22086018	145	NA12884	0/0	0/1	27	24	FALSE	TRUE
chr8	22086491	145	NA12884	0/1	0/0	54	0	FALSE	TRUE
chr8	22086830	145	NA12884	0/1	0/0	49	0	FALSE	TRUE
chr8	22087184	145	NA12884	0/0	0/1	19	15	FALSE	TRUE
chr8	22099989	146	NA12884	0/0	0/1	34	22	FALSE	TRUE
chr8	22131979	147	NA12884	0/0	0/1	27	19	FALSE	TRUE
chr8	22132033	147	NA12884	0/0	0/1	27	20	FALSE	TRUE
chr8	22145319	148	NA12884	0/0	0/1	23	21	FALSE	TRUE
chr8	22145728	148	NA12884	0/1	0/0	56	0	FALSE	TRUE
chr8	22148518	148	NA12884	0/0	0/1	29	24	FALSE	TRUE
chr8	22149476	148	NA12884	0/0	0/1	29	17	FALSE	TRUE
chr8	22151533	148	NA12884	0/0	0/1	24	24	FALSE	TRUE
chr8	22151661	148	NA12884	0/0	0/1	24	24	FALSE	TRUE
chr8	22151947	148	NA12884	0/0	0/1	26	15	FALSE	TRUE
chr8	22167613	149	NA12884	0/0	0/1	24	29	FALSE	TRUE
chr8	22169087	149	NA12884	0/0	0/1	23	28	FALSE	TRUE
chr8	22178742	149	NA12884	0/0	0/1	19	26	FALSE	TRUE
chr8	22179763	149	NA12884	0/0	0/1	25	21	FALSE	TRUE
chr8	22180347	149	NA12884	0/0	0/1	25	18	FALSE	TRUE
chr8	22181652	149	NA12884	0/0	0/1	26	23	FALSE	TRUE
chr8	22183817	149	NA12884	0/0	0/1	17	23	FALSE	TRUE
chr8	22192614	149	NA12884	0/0	0/1	23	28	FALSE	TRUE
chr8	22192847	149	NA12884	0/0	0/1	25	37	FALSE	TRUE
chr8	22198981	149	NA12884	0/0	0/1	26	21	FALSE	TRUE
chr8	22203003	149	NA12884	0/0	0/1	25	15	FALSE	TRUE
chr8	22203184	149	NA12884	0/0	0/1	23	15	FALSE	TRUE
chr8	22204421	149	NA12884	0/1	0/0	48	0	FALSE	TRUE
chr8	22214508	150	NA12884	0/0	0/1	17	25	FALSE	TRUE
chr8	22364445	151	NA12893	0/0	0/1	22	30	TRUE	FALSE
chr8	31739177	152	NA12893	0/0	0/1	35	27	FALSE	TRUE
chr8	62144588	153	NA12879	1/1	0/1	36	23	TRUE	TRUE
chr8	70543613	154	NA12879	0/1	0/0	44	0	TRUE	FALSE
chr8	70555245	155	NA12886	1/1	0/1	14	44	TRUE	FALSE
chr8	78551413	156	NA12893	1/1	0/1	28	27	TRUE	TRUE
chr8	88719933	157	NA12879	1/1	0/1	43	21	TRUE	TRUE
chr8	104931609	158	NA12879	0/1	0/0	49	0	FALSE	TRUE
chr8	121631552	159	NA12879	0/0	0/1	27	30	TRUE	FALSE
chr8	125683183	160	NA12888	0/1	0/0	59	0	TRUE	FALSE
chr8	135305502	161	NA12883	0/0	0/1	23	29	TRUE	FALSE
chr8	141704996	162	NA12893	0/1	1/1	0	38	TRUE	FALSE
chr8	145741765	163	NA12882	0/1	0/0	72	0	TRUE	FALSE
chr9	791218	164	NA12880	0/0	0/1	33	11	TRUE	FALSE
chr9	4966178	165	NA12886	0/1	1/1	0	62	FALSE	TRUE
chr9	4972397	165	NA12886	0/1	0/0	52	0	FALSE	TRUE
chr9	4985388	166	NA12886	0/1	0/0	56	0	FALSE	TRUE
chr9	4995097	166	NA12886	0/0	0/1	36	38	FALSE	TRUE
chr9	6974143	167	NA12884	0/0	0/1	24	25	TRUE	FALSE
chr9	10362794	168	NA12888	1/1	0/1	31	13	FALSE	TRUE
chr9	10375429	169	NA12888	1/1	0/1	38	29	FALSE	TRUE
chr9	33589125	170	NA12879	0/0	0/1	23	30	FALSE	TRUE
chr9	33589647	170	NA12879	1/1	0/1	29	20	FALSE	TRUE
chr9	33589676	170	NA12879	0/0	0/1	22	28	FALSE	TRUE
chr9	33592043	170	NA12879	1/1	0/1	22	32	FALSE	TRUE
chr9	33592095	170	NA12879	1/1	0/1	26	33	FALSE	TRUE
chr9	33592512	170	NA12879	0/0	0/1	39	30	FALSE	TRUE
chr9	33593586	170	NA12879	0/0	0/1	24	27	FALSE	TRUE
chr9	33593783	170	NA12879	0/0	0/1	24	21	FALSE	TRUE
chr9	33593937	170	NA12879	0/0	0/1	16	19	FALSE	TRUE
chr9	33594325	170	NA12879	1/1	0/1	14	20	FALSE	TRUE
chr9	33594705	170	NA12879	0/0	0/1	22	14	FALSE	TRUE
chr9	71847192	171	NA12888	0/1	0/0	60	0	TRUE	FALSE
chr9	85175793	172	NA12887	0/1	0/0	46	0	FALSE	TRUE
chr9	94554651	173	NA12882	0/0	0/1	18	13	TRUE	FALSE
chr9	121311833	174	NA12883	0/0	0/1	29	17	TRUE	FALSE
chr9	135962585	175	NA12885	1/1	0/1	11	39	TRUE	TRUE
chr9	136641605	176	NA12888	0/1	1/1	0	40	TRUE	FALSE
chr9	136879488	177	NA12885	1/1	0/1	27	21	TRUE	TRUE
chr9	140617535	178	NA12879	1/1	0/1	13	32	TRUE	TRUE
chr9	140693548	179	NA12879	1/1	0/1	24	28	TRUE	TRUE
chr10	1508048	180	NA12880	0/0	0/1	25	24	TRUE	FALSE
chr10	1746770	181	NA12883	0/0	0/1	20	18	TRUE	FALSE
chr10	3484416	182	NA12879	0/0	0/1	20	24	TRUE	FALSE
chr10	7670540	183	NA12885	1/1	0/1	25	26	TRUE	TRUE
chr10	7670547	183	NA12885	1/1	0/1	25	29	TRUE	TRUE
chr10	8911579	184	NA12881	0/0	0/1	15	16	TRUE	FALSE
chr10	25031798	185	NA12880	1/1	0/1	11	29	TRUE	TRUE
chr10	27159990	186	NA12887	0/1	0/0	55	0	FALSE	TRUE
chr10	27979252	187	NA12879	0/1	0/0	58	0	TRUE	FALSE
chr10	30056518	188	NA12879	0/1	0/0	52	0	FALSE	TRUE
chr10	34837272	189	NA12888	0/0	0/1	48	12	TRUE	TRUE
chr10	44854587	190	NA12882	0/1	1/1	0	39	TRUE	FALSE
chr10	59306418	191	NA12883	0/1	1/1	0	54	FALSE	TRUE
chr10	79712789	192	NA12886	0/1	0/0	50	0	FALSE	TRUE
chr10	89034494	193	NA12886	1/1	0/1	30	33	TRUE	TRUE
chr10	89244957	194	NA12886	1/1	0/1	42	22	TRUE	TRUE
chr10	102623730	195	NA12893	0/0	0/1	23	16	TRUE	FALSE
chr10	119523207	196	NA12885	0/1	0/0	46	0	FALSE	TRUE
chr10	124236684	197	NA12886	0/0	0/1	18	31	FALSE	TRUE
chr11	4322405	198	NA12887	0/0	0/1	57	14	TRUE	TRUE
chr11	4346014	199	NA12887	1/1	0/1	18	20	TRUE	TRUE
chr11	18737095	200	NA12881	0/1	0/0	49	0	FALSE	TRUE
chr11	44286176	201	NA12883	0/0	0/1	13	28	FALSE	TRUE
chr11	60973311	202	NA12888	1/1	0/1	38	22	TRUE	TRUE
chr11	65018730	203	NA12882	0/1	0/0	61	2	TRUE	FALSE
chr11	72261615	204	NA12893	0/0	0/1	25	10	FALSE	TRUE
chr11	86165187	205	NA12893	1/1	0/1	26	26	TRUE	FALSE
chr11	90977566	206	NA12886	1/1	0/1	12	47	FALSE	TRUE
chr11	105814611	207	NA12893	0/1	0/0	56	0	FALSE	TRUE
chr11	116562288	208	NA12881	0/0	0/1	33	16	FALSE	TRUE
chr12	1730930	209	NA12886	0/0	0/1	22	25	TRUE	FALSE
chr12	1731068	209	NA12886	0/1	0/0	62	0	TRUE	FALSE
chr12	1731370	209	NA12886	0/1	0/0	47	0	TRUE	FALSE
chr12	1731391	209	NA12886	0/0	0/1	25	22	TRUE	FALSE
chr12	1731432	209	NA12886	0/1	0/0	50	0	TRUE	FALSE
chr12	1731440	209	NA12886	0/1	0/0	50	0	TRUE	FALSE
chr12	1732295	209	NA12886	0/0	0/1	29	22	TRUE	FALSE
chr12	1732310	209	NA12886	0/1	0/0	45	0	TRUE	FALSE
chr12	3272657	210	NA12880	0/0	0/1	23	21	TRUE	FALSE
chr12	11220335	211	NA12885	0/0	0/1	49	24	TRUE	TRUE
chr12	11222391	211	NA12885	0/0	0/1	50	21	TRUE	TRUE
chr12	11222426	211	NA12885	0/0	0/1	46	24	TRUE	TRUE
chr12	11222558	211	NA12885	0/0	0/1	50	19	TRUE	TRUE
chr12	11222616	211	NA12885	0/0	0/1	44	17	TRUE	TRUE
chr12	11222646	211	NA12885	0/0	0/1	39	16	TRUE	TRUE
chr12	11222657	211	NA12885	0/0	0/1	40	19	TRUE	TRUE
chr12	11222832	211	NA12885	0/0	0/1	58	14	TRUE	TRUE
chr12	11222980	211	NA12885	0/0	0/1	42	13	TRUE	TRUE
chr12	11222981	211	NA12885	0/0	0/1	43	13	TRUE	TRUE
chr12	11223797	211	NA12885	0/0	0/1	36	24	TRUE	TRUE
chr12	11223849	211	NA12885	0/0	0/1	40	23	TRUE	TRUE
chr12	11224867	211	NA12885	0/0	0/1	49	19	TRUE	TRUE
chr12	11226054	211	NA12885	0/0	0/1	47	16	TRUE	TRUE
chr12	11226059	211	NA12885	0/0	0/1	45	16	TRUE	TRUE
chr12	11226072	211	NA12885	0/0	0/1	44	17	TRUE	TRUE
chr12	11226093	211	NA12885	0/0	0/1	44	18	TRUE	TRUE
chr12	11226750	211	NA12885	0/0	0/1	44	22	TRUE	TRUE
chr12	11226753	211	NA12885	0/0	0/1	46	22	TRUE	TRUE
chr12	11226788	211	NA12885	0/0	0/1	50	11	TRUE	TRUE
chr12	11226789	211	NA12885	0/0	0/1	50	11	TRUE	TRUE
chr12	11226790	211	NA12885	0/0	0/1	46	11	TRUE	TRUE
chr12	11228890	211	NA12885	0/0	0/1	58	17	TRUE	TRUE
chr12	11228900	211	NA12885	0/0	0/1	56	17	TRUE	TRUE
chr12	11228932	211	NA12885	0/0	0/1	46	12	TRUE	TRUE
chr12	11230261	211	NA12885	0/0	0/1	60	11	TRUE	TRUE
chr12	11230269	211	NA12885	0/0	0/1	60	11	TRUE	TRUE
chr12	11230867	211	NA12885	0/0	0/1	54	20	TRUE	TRUE
chr12	11231606	211	NA12885	0/0	0/1	55	15	TRUE	TRUE
chr12	11237076	211	NA12885	0/0	0/1	48	23	TRUE	TRUE
chr12	11237857	211	NA12885	0/0	0/1	48	18	TRUE	TRUE
chr12	11237914	211	NA12885	0/0	0/1	31	19	TRUE	TRUE
chr12	11239114	211	NA12885	0/0	0/1	49	18	TRUE	TRUE
chr12	11239115	211	NA12885	0/0	0/1	52	17	TRUE	TRUE
chr12	11239125	211	NA12885	0/0	0/1	52	16	TRUE	TRUE
chr12	11239127	211	NA12885	0/0	0/1	54	16	TRUE	TRUE
chr12	11239151	211	NA12885	0/0	0/1	51	12	TRUE	TRUE
chr12	11239158	211	NA12885	0/0	0/1	49	12	TRUE	TRUE
chr12	11239160	211	NA12885	0/0	0/1	50	11	TRUE	TRUE
chr12	11239161	211	NA12885	0/0	0/1	52	11	TRUE	TRUE
chr12	11665492	212	NA12886	0/1	0/0	36	0	TRUE	FALSE
chr12	25599858	213	NA12885	0/0	0/1	14	20	TRUE	FALSE
chr12	31515383	214	NA12885	0/1	0/0	49	0	FALSE	TRUE
chr12	43981759	215	NA12880	0/0	0/1	28	30	FALSE	TRUE
chr12	65926937	216	NA12888	0/0	0/1	29	18	FALSE	TRUE
chr12	90314878	217	NA12885	0/0	0/1	27	19	TRUE	TRUE
chr12	117991894	218	NA12882	0/0	0/1	27	35	TRUE	TRUE
chr12	125000246	219	NA12883	0/1	1/1	0	39	FALSE	TRUE
chr12	125003705	219	NA12883	0/1	0/0	45	0	FALSE	TRUE
chr12	127630079	220	NA12893	0/1	0/0	61	1	FALSE	TRUE
chr12	128500911	221	NA12879	0/1	1/1	0	50	TRUE	FALSE
chr12	128500923	221	NA12879	0/1	0/0	56	0	TRUE	FALSE
chr12	130312069	222	NA12880	0/0	0/1	21	27	TRUE	FALSE
chr12	132067683	223	NA12883	1/1	0/1	24	32	TRUE	TRUE
chr13	23517047	224	NA12882	0/0	0/1	47	11	TRUE	FALSE
chr13	75816823	225	NA12883	0/0	0/1	23	31	FALSE	TRUE
chr13	80940830	226	NA12887	0/1	0/0	49	0	TRUE	FALSE
chr13	86203146	227	NA12884	0/0	0/1	26	17	TRUE	TRUE
chr13	96086711	228	NA12886	0/1	0/0	58	0	TRUE	FALSE
chr14	27190748	229	NA12887	0/1	1/1	0	70	TRUE	FALSE
chr14	27199509	229	NA12887	0/1	0/0	59	0	TRUE	FALSE
chr14	27213499	230	NA12887	0/0	0/1	21	30	TRUE	FALSE
chr14	27242189	231	NA12887	0/0	0/1	28	19	TRUE	FALSE
chr14	27242877	231	NA12887	0/0	0/1	22	20	TRUE	TRUE
chr14	27244342	231	NA12887	1/1	0/1	27	20	TRUE	TRUE
chr14	27245961	231	NA12887	0/0	0/1	21	21	TRUE	FALSE
chr14	27250298	231	NA12887	0/0	0/1	25	26	TRUE	TRUE
chr14	52816916	232	NA12885	0/1	0/0	33	0	FALSE	TRUE
chr14	77007594	233	NA12885	0/0	0/1	30	38	FALSE	TRUE
chr14	77007737	233	NA12885	0/1	0/0	52	0	FALSE	TRUE
chr14	77062591	234	NA12879	0/1	1/1	0	41	FALSE	TRUE
chr14	93336874	235	NA12885	0/0	0/1	41	17	TRUE	TRUE
chr14	101579494	236	NA12884	0/1	0/0	35	0	FALSE	TRUE
chr14	101650955	237	NA12885	1/1	0/1	20	23	FALSE	TRUE
chr14	107084710	238	NA12881	0/1	0/0	34	0	TRUE	FALSE
chr14	107084730	238	NA12881	0/1	0/0	31	1	TRUE	FALSE
chr15	23161050	239	NA12887	0/1	0/0	59	0	FALSE	TRUE
chr15	23181559	240	NA12887	0/0	0/1	19	25	FALSE	TRUE
chr15	23187620	240	NA12887	0/0	0/1	37	32	FALSE	TRUE
chr15	23205619	241	NA12887	0/0	0/1	28	30	FALSE	TRUE
chr15	23208270	241	NA12887	0/1	0/0	53	0	FALSE	TRUE
chr15	23224177	242	NA12887	0/0	0/1	22	26	FALSE	TRUE
chr15	23226468	242	NA12887	0/1	0/0	63	0	FALSE	TRUE
chr15	23230383	242	NA12887	0/1	1/1	0	45	FALSE	TRUE
chr15	23231628	242	NA12887	0/1	1/1	0	45	FALSE	TRUE
chr15	23232224	242	NA12887	0/1	1/1	0	64	FALSE	TRUE
chr15	23233623	242	NA12887	0/1	1/1	0	55	FALSE	TRUE
chr15	23233751	242	NA12887	0/1	0/0	56	0	FALSE	TRUE
chr15	23233839	242	NA12887	0/1	1/1	0	48	FALSE	TRUE
chr15	23234108	242	NA12887	0/1	1/1	0	30	FALSE	TRUE
chr15	23234412	242	NA12887	0/1	1/1	0	40	FALSE	TRUE
chr15	23235428	242	NA12887	0/1	1/1	0	35	FALSE	TRUE
chr15	23235886	242	NA12887	0/0	0/1	28	21	FALSE	TRUE
chr15	23235901	242	NA12887	0/0	0/1	25	19	FALSE	TRUE
chr15	23276306	243	NA12887	0/0	0/1	30	22	FALSE	TRUE
chr15	23281801	243	NA12887	0/0	0/1	26	17	FALSE	TRUE
chr15	23283460	243	NA12887	1/1	0/1	31	24	TRUE	TRUE
chr15	23317085	244	NA12887	0/0	0/1	38	13	FALSE	TRUE
chr15	23428838	245	NA12887	0/0	0/1	39	20	FALSE	TRUE
chr15	23457481	246	NA12887	1/1	0/1	18	25	FALSE	TRUE
chr15	23458521	246	NA12887	1/1	0/1	27	24	FALSE	TRUE
chr15	23461403	246	NA12887	1/1	0/1	14	22	FALSE	TRUE
chr15	23464114	246	NA12887	1/1	0/1	13	24	FALSE	TRUE
chr15	28986430	247	NA12886	0/0	0/1	55	11	FALSE	TRUE
chr15	30462538	248	NA12888	1/1	0/1	11	27	TRUE	TRUE
chr15	32649679	249	NA12888	1/1	0/1	20	30	TRUE	TRUE
chr15	32651741	249	NA12888	1/1	0/1	13	35	TRUE	TRUE
chr15	32660819	249	NA12888	1/1	0/1	25	36	TRUE	TRUE
chr15	33559300	250	NA12879	1/1	0/1	30	23	TRUE	TRUE
chr15	45116468	251	NA12893	1/1	0/1	39	31	TRUE	TRUE
chr15	45116632	251	NA12893	1/1	0/1	27	30	TRUE	TRUE
chr15	45366166	252	NA12893	1/1	0/1	40	30	TRUE	TRUE
chr15	45366439	252	NA12893	1/1	0/1	42	34	TRUE	TRUE
chr15	45366583	252	NA12893	1/1	0/1	27	43	TRUE	TRUE
chr15	45368583	252	NA12893	1/1	0/1	29	27	TRUE	TRUE
chr15	45368879	252	NA12893	1/1	0/1	25	27	TRUE	TRUE
chr15	45369003	252	NA12893	1/1	0/1	37	36	TRUE	TRUE
chr15	45369043	252	NA12893	1/1	0/1	41	34	TRUE	TRUE
chr15	57103754	253	NA12893	1/1	0/1	12	42	TRUE	TRUE
chr15	60375054	254	NA12885	0/1	1/1	0	39	TRUE	FALSE
chr15	78242998	255	NA12885	0/0	0/1	30	35	TRUE	TRUE
chr15	79901820	256	NA12884	0/1	1/1	0	49	FALSE	TRUE
chr15	79902267	256	NA12884	0/1	1/1	0	42	FALSE	TRUE
chr15	81219461	257	NA12880	1/1	0/1	19	18	FALSE	TRUE
chr15	90397752	258	NA12880	0/1	0/0	48	2	TRUE	FALSE
chr16	7460232	259	NA12879	0/0	0/1	27	22	TRUE	TRUE
chr16	8613561	260	NA12887	1/1	0/1	26	47	TRUE	TRUE
chr16	8613585	260	NA12887	1/1	0/1	26	42	TRUE	TRUE
chr16	10746745	261	NA12881	1/1	0/1	26	24	TRUE	TRUE
chr16	10746774	261	NA12881	1/1	0/1	42	18	TRUE	TRUE
chr16	15118254	262	NA12881	0/0	0/1	34	13	TRUE	TRUE
chr16	15313465	263	NA12881	1/1	0/1	16	30	TRUE	TRUE
chr16	15385224	264	NA12881	1/1	0/1	16	35	TRUE	TRUE
chr16	15396122	265	NA12881	1/1	0/1	18	38	TRUE	TRUE
chr16	15454089	266	NA12881	1/1	0/1	39	21	TRUE	TRUE
chr16	16620116	267	NA12881	1/1	0/1	29	23	TRUE	TRUE
chr16	16621600	267	NA12881	1/1	0/1	17	38	TRUE	TRUE
chr16	16627915	267	NA12881	1/1	0/1	27	24	TRUE	TRUE
chr16	16693337	268	NA12881	0/0	0/1	32	21	TRUE	TRUE
chr16	18238549	269	NA12881	0/0	0/1	47	22	TRUE	TRUE
chr16	18275254	270	NA12881	1/1	0/1	32	28	TRUE	TRUE
chr16	18276106	270	NA12881	1/1	0/1	32	26	TRUE	TRUE
chr16	18283489	270	NA12881	1/1	0/1	32	35	TRUE	TRUE
chr16	18774447	271	NA12881	1/1	0/1	24	17	TRUE	TRUE
chr16	18774457	271	NA12881	1/1	0/1	25	22	TRUE	TRUE
chr16	18774460	271	NA12881	1/1	0/1	27	22	TRUE	TRUE
chr16	22600299	272	NA12881	1/1	0/1	25	30	TRUE	TRUE
chr16	29343855	273	NA12884	1/1	0/1	15	30	TRUE	TRUE
chr16	31320298	274	NA12884	1/1	0/1	36	28	TRUE	TRUE
chr16	51150933	275	NA12883	1/1	0/1	28	31	TRUE	TRUE
chr16	69985383	276	NA12883	1/1	0/1	30	28	TRUE	TRUE
chr16	69987158	276	NA12883	1/1	0/1	27	36	TRUE	TRUE
chr16	69998874	277	NA12883	1/1	0/1	33	22	TRUE	TRUE
chr16	70115987	278	NA12883	1/1	0/1	11	48	TRUE	TRUE
chr16	70213414	279	NA12883	1/1	0/1	26	30	TRUE	TRUE
chr16	70215219	279	NA12883	1/1	0/1	13	32	TRUE	TRUE
chr16	71092288	280	NA12883	1/1	0/1	19	39	TRUE	TRUE
chr16	74087814	281	NA12893	1/1	0/1	28	30	TRUE	FALSE
chr16	76055857	282	NA12893	0/0	0/1	23	27	TRUE	FALSE
chr16	81802184	283	NA12882	0/1	0/0	54	0	FALSE	TRUE
chr17	35293520	284	NA12881	0/0	0/1	20	24	FALSE	TRUE
chr17	56113630	285	NA12893	0/1	1/1	0	39	TRUE	FALSE
chr17	56179482	286	NA12893	1/1	0/1	30	32	TRUE	TRUE
chr17	77766939	287	NA12885	0/1	0/0	29	0	TRUE	FALSE
chr17	78827615	288	NA12885	0/1	1/1	0	34	FALSE	TRUE
chr18	10614028	289	NA12883	0/1	0/0	63	0	TRUE	FALSE
chr18	10630676	290	NA12883	0/1	1/1	0	50	TRUE	FALSE
chr18	14673062	291	NA12888	1/1	0/1	18	40	TRUE	TRUE
chr18	20780496	292	NA12879	0/1	0/0	57	0	TRUE	FALSE
chr18	46551262	293	NA12885	1/1	0/1	26	24	FALSE	TRUE
chr18	49013731	294	NA12884	0/1	1/1	0	42	TRUE	FALSE
chr18	60120317	295	NA12882	0/1	1/1	0	37	FALSE	TRUE
chr18	71594438	296	NA12879	0/1	1/1	0	51	TRUE	FALSE
chr19	1261135	297	NA12885	0/1	0/0	57	0	TRUE	FALSE
chr19	8201986	298	NA12884	1/1	0/1	30	25	TRUE	TRUE
chr19	11257257	299	NA12888	0/1	1/1	0	41	TRUE	FALSE
chr19	54102618	300	NA12881	0/1	1/1	0	37	TRUE	FALSE
chr20	1908858	301	NA12886	0/1	0/0	34	0	FALSE	TRUE
chr20	1909906	301	NA12886	0/0	0/1	22	23	FALSE	TRUE
chr20	1909920	301	NA12886	0/0	0/1	25	28	FALSE	TRUE
chr20	1910382	301	NA12886	0/1	1/1	0	43	FALSE	TRUE
chr20	1910651	301	NA12886	0/1	0/0	36	0	FALSE	TRUE
chr20	1910774	301	NA12886	0/1	1/1	0	50	FALSE	TRUE
chr20	1910881	301	NA12886	0/1	0/0	60	0	FALSE	TRUE
chr20	1910898	301	NA12886	0/1	1/1	0	68	FALSE	TRUE
chr20	1912310	301	NA12886	0/1	1/1	0	63	FALSE	TRUE
chr20	21694022	302	NA12881	0/0	0/1	30	22	FALSE	TRUE
chr20	29428368	303	NA12879	0/0	0/1	23	22	TRUE	TRUE
chr20	29560006	304	NA12879	0/0	0/1	30	22	TRUE	TRUE
chr20	60255515	305	NA12888	0/1	1/1	0	44	TRUE	FALSE
chr20	62190345	306	NA12883	1/1	0/1	17	17	TRUE	FALSE
chr21	24852496	307	NA12893	0/1	1/1	0	55	FALSE	TRUE
chr21	33104957	308	NA12886	1/1	0/1	33	28	TRUE	TRUE
chr21	33106166	308	NA12886	1/1	0/1	17	26	TRUE	TRUE
chr21	33111339	308	NA12886	1/1	0/1	38	32	TRUE	TRUE
chr21	33111691	308	NA12886	1/1	0/1	28	25	TRUE	TRUE
chr21	33127978	309	NA12886	1/1	0/1	36	29	TRUE	TRUE
chr21	33131968	309	NA12886	1/1	0/1	23	32	TRUE	TRUE
chr21	33132402	309	NA12886	1/1	0/1	26	26	TRUE	TRUE
chr21	33132918	309	NA12886	1/1	0/1	32	25	TRUE	TRUE
chr21	44003072	310	NA12886	1/1	0/1	44	23	TRUE	TRUE
chr22	18843686	311	NA12888	0/0	0/1	48	16	TRUE	TRUE
chr22	20458830	312	NA12879	0/1	0/0	43	0	TRUE	FALSE
chr22	20710386	313	NA12888	1/1	0/1	28	26	TRUE	TRUE
chr22	20714003	313	NA12888	1/1	0/1	34	39	TRUE	TRUE
chr22	20714329	313	NA12888	1/1	0/1	17	36	TRUE	TRUE
chr22	22769943	314	NA12893	0/1	0/0	25	0	TRUE	FALSE
chr22	22776644	314	NA12893	0/1	0/0	30	0	TRUE	FALSE
chr22	22847484	315	NA12893	0/1	0/0	27	0	TRUE	FALSE
chr22	22879227	316	NA12893	0/1	0/0	27	0	TRUE	FALSE
chr22	22879791	316	NA12893	0/1	0/0	27	0	TRUE	FALSE
chr22	22879854	316	NA12893	0/1	0/0	34	1	TRUE	FALSE
chr22	22882732	316	NA12893	0/1	0/0	25	1	TRUE	FALSE
chr22	22883450	316	NA12893	0/1	0/0	25	1	TRUE	FALSE
chr22	22923333	317	NA12893	0/1	0/0	30	0	TRUE	FALSE
chr22	22925095	317	NA12893	0/1	0/0	28	1	TRUE	FALSE
chr22	31308109	318	NA12885	0/1	0/0	51	0	FALSE	TRUE
chr22	38676341	319	NA12883	0/1	0/0	44	0	TRUE	FALSE
chr22	49262800	320	NA12882	0/1	1/1	0	59	TRUE	FALSE
chr22	49642406	321	NA12885	0/0	0/1	22	24	TRUE	FALSE
chr22	49654501	322	NA12885	0/1	0/0	32	0	TRUE	FALSE
chr22	49656282	322	NA12885	0/1	0/0	47	0	TRUE	FALSE
chr22	49656334	322	NA12885	0/1	1/1	0	47	TRUE	FALSE
chr22	49656816	322	NA12885	0/1	0/0	31	0	TRUE	FALSE
chr22	49657071	322	NA12885	0/1	0/0	41	0	TRUE	FALSE
chr22	49657710	322	NA12885	0/1	1/1	0	49	TRUE	FALSE
